# Supplementary material for: Synthesis of 3-aryl-1H-indazoles via iridium-catalysed C–H borylation and Suzuki–Miyaura coupling
Source: Royal Society of Chemistry journal article supplement (doi:10.1039/c4ra04235b), 2014-01-01

## **Synthesis of 3-Aryl-1*H*-Indazoles via iridium-catalysed C-H borylation and Suzuki-Miyaura coupling**

Ben. A. Egan and Paul M. Burton

*Syngenta Ltd., Jealott's Hill International Research Centre, Bracknell,  
Berkshire RG42 6EY, U.K.*

Paul.Burton@syngenta.com

$^1\text{H}$  NMR (400 MHz,  $\text{DMSO}-d_6$ )  $\delta$  ppm 1.34 (12 H, s) 4.11 (3 H, s) 7.21 (1 H, t,  $J=7.2$  Hz) 7.40 (1 H, t,  $J=7.3$  Hz) 7.68 (1 H, d,  $J=8.4$  Hz) 7.90 (1 H, d,  $J=8.1$  Hz)

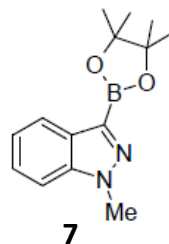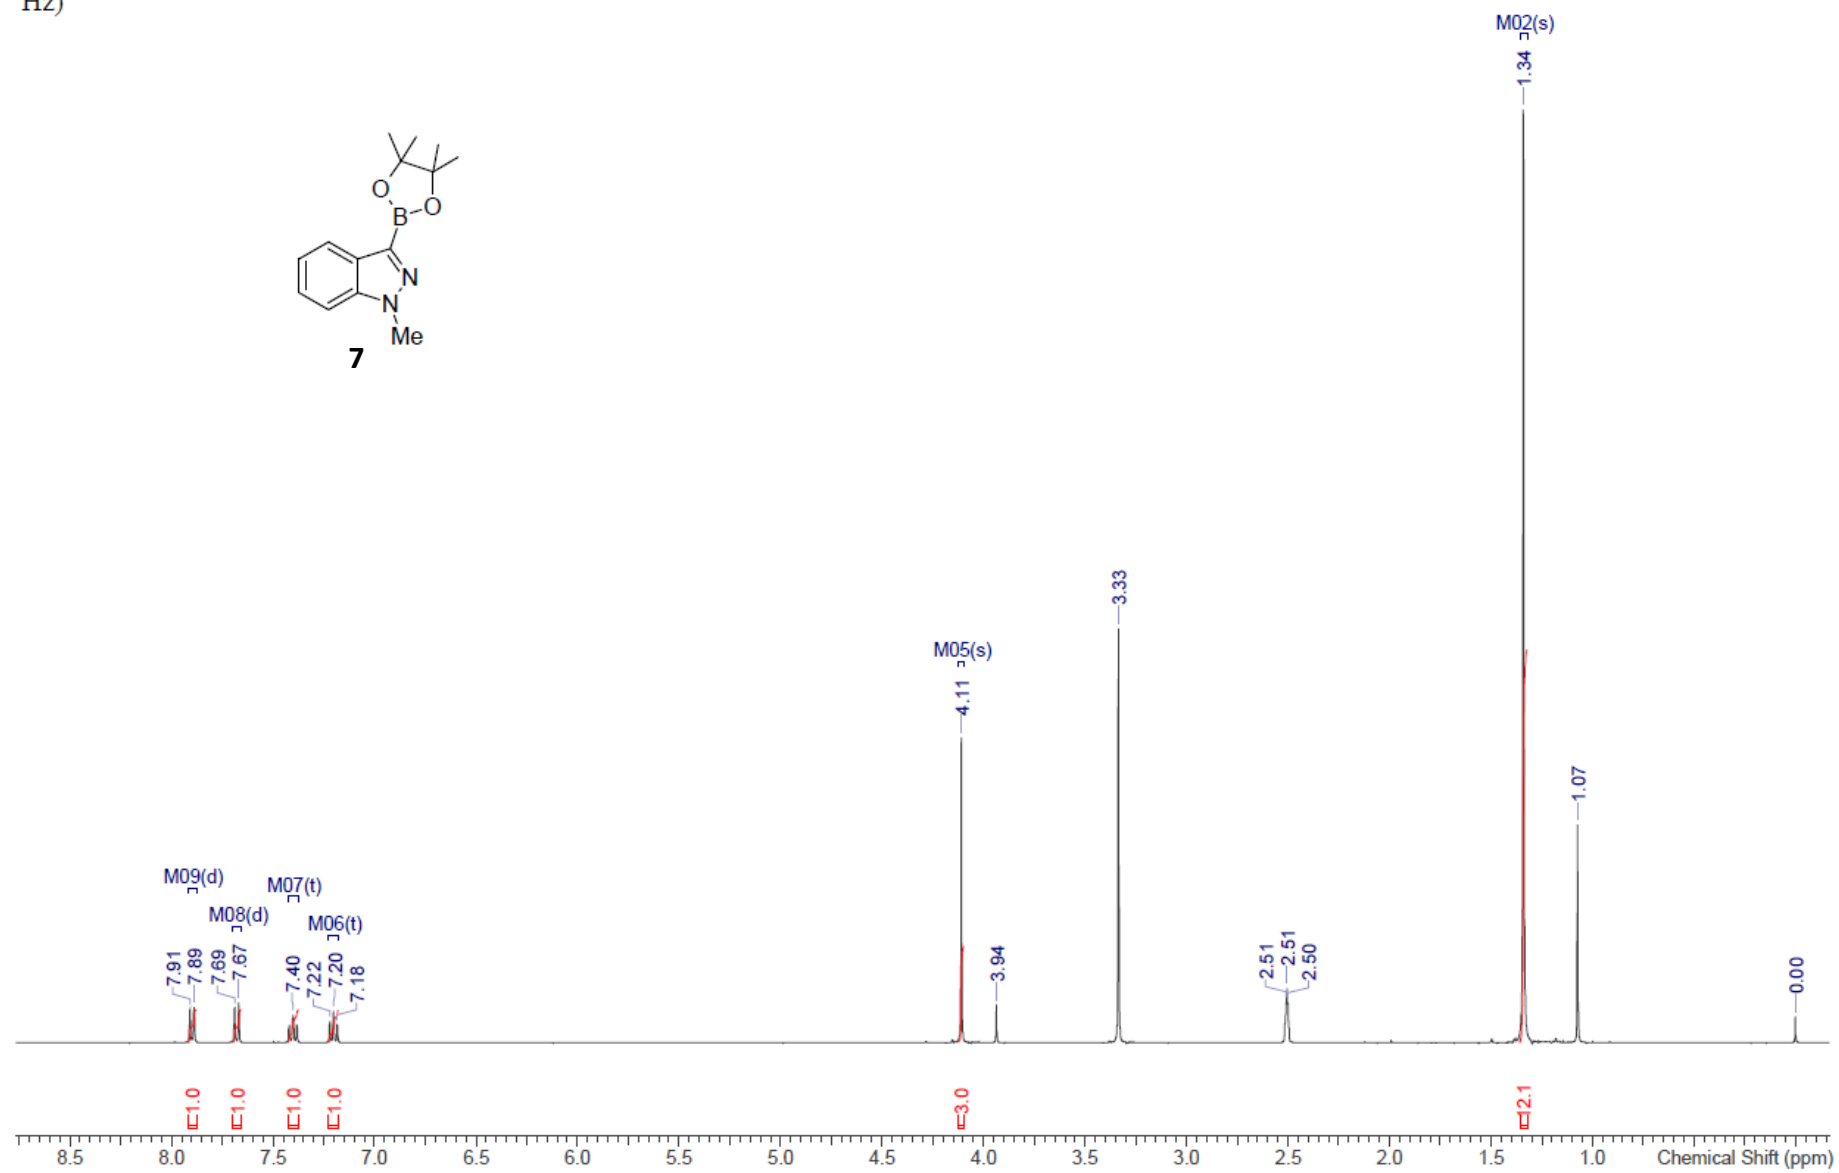

$^{13}\text{C}$  NMR (100 MHz,  $\text{DMSO-}d_6$ )

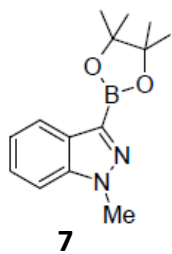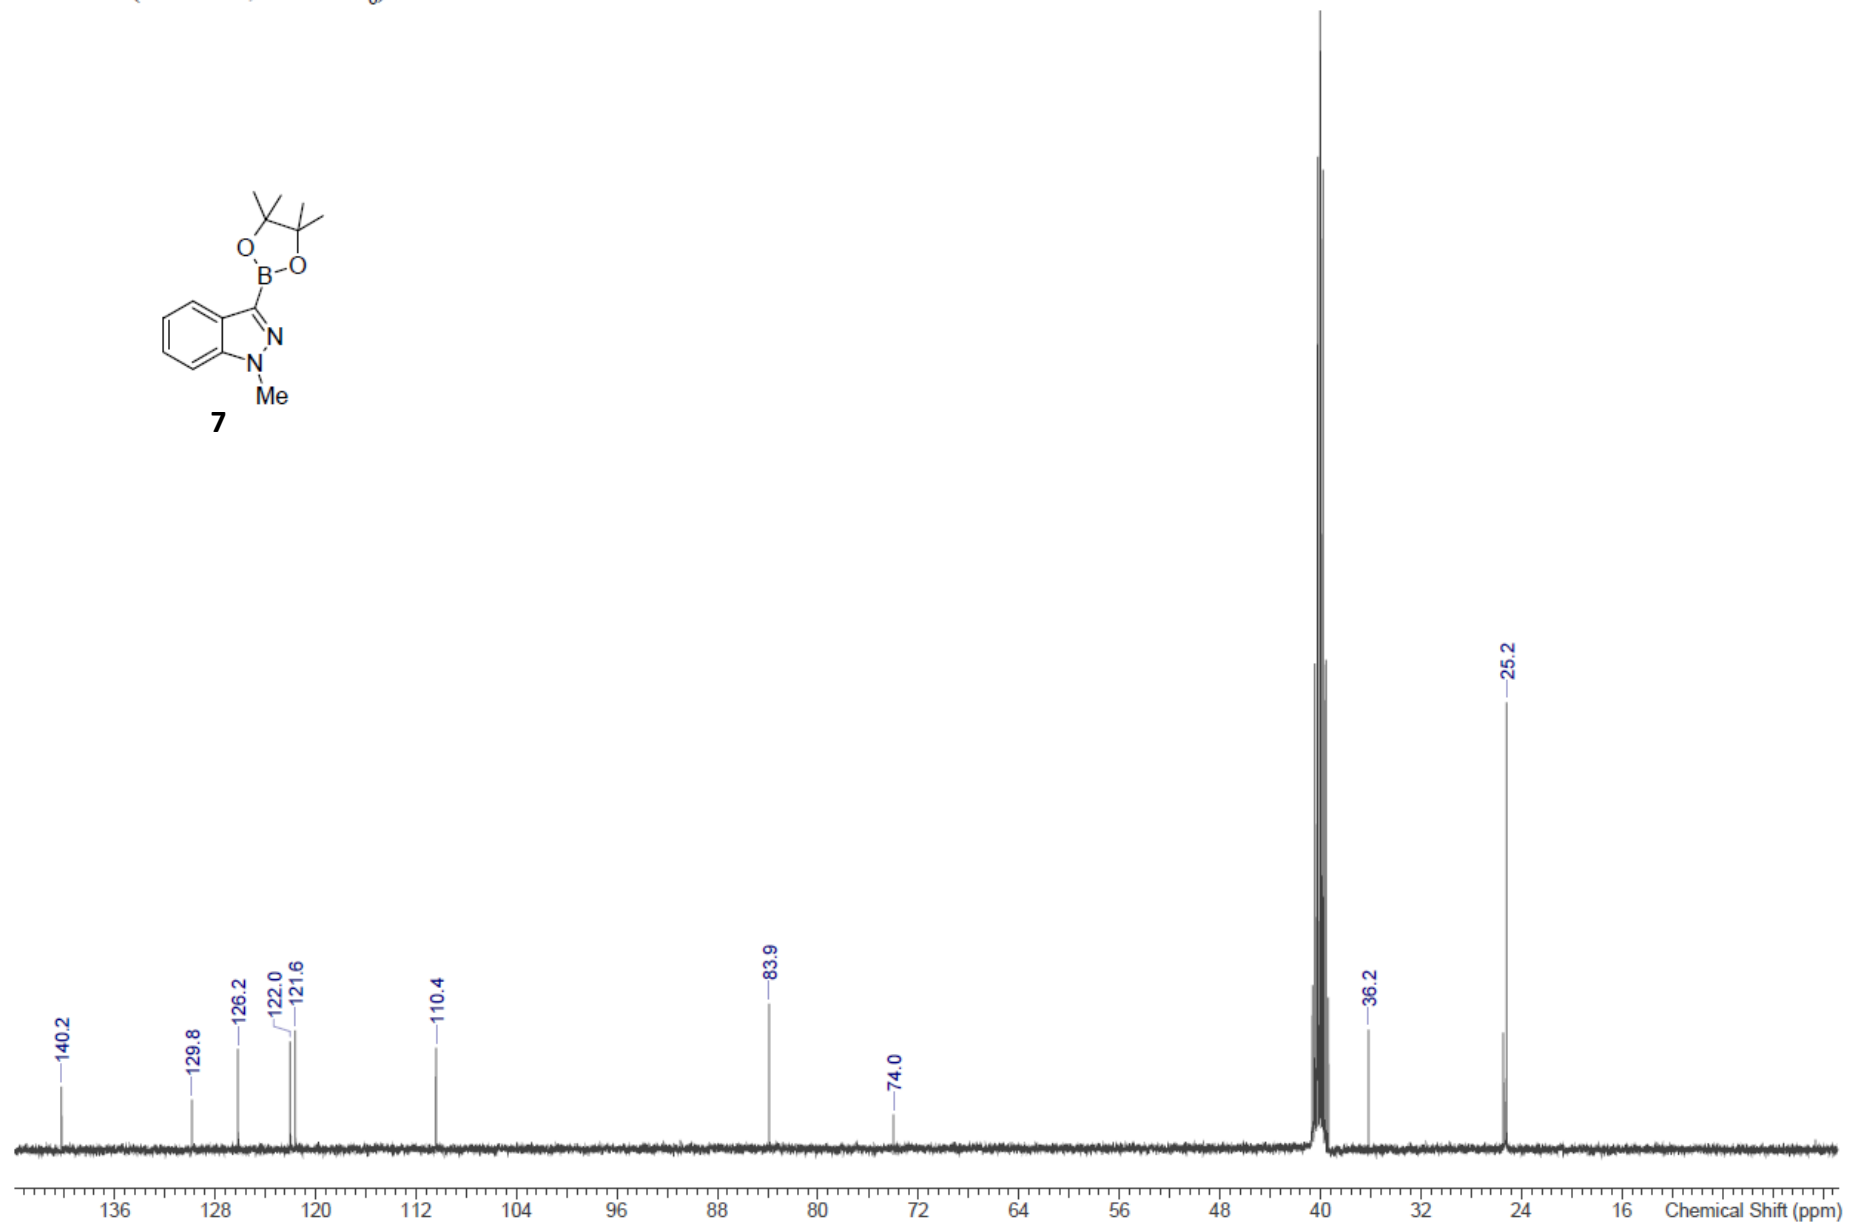

$^1\text{H}$  NMR (400 MHz,  $\text{DMSO}-d_6$ ): 4.12 (3 H, s) 7.24 (1 H, t,  $J=7.6$  Hz) 7.38 - 7.43 (1 H, m) 7.46 (1 H, t,  $J=7.6$  Hz) 7.52 (2 H, t,  $J=7.6$  Hz) 7.70 (1 H, d,  $J=8.3$  Hz) 7.98 (2 H, d,  $J=7.3$  Hz) 8.07 (1 H, d,  $J=8.3$  Hz)

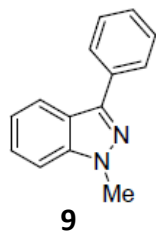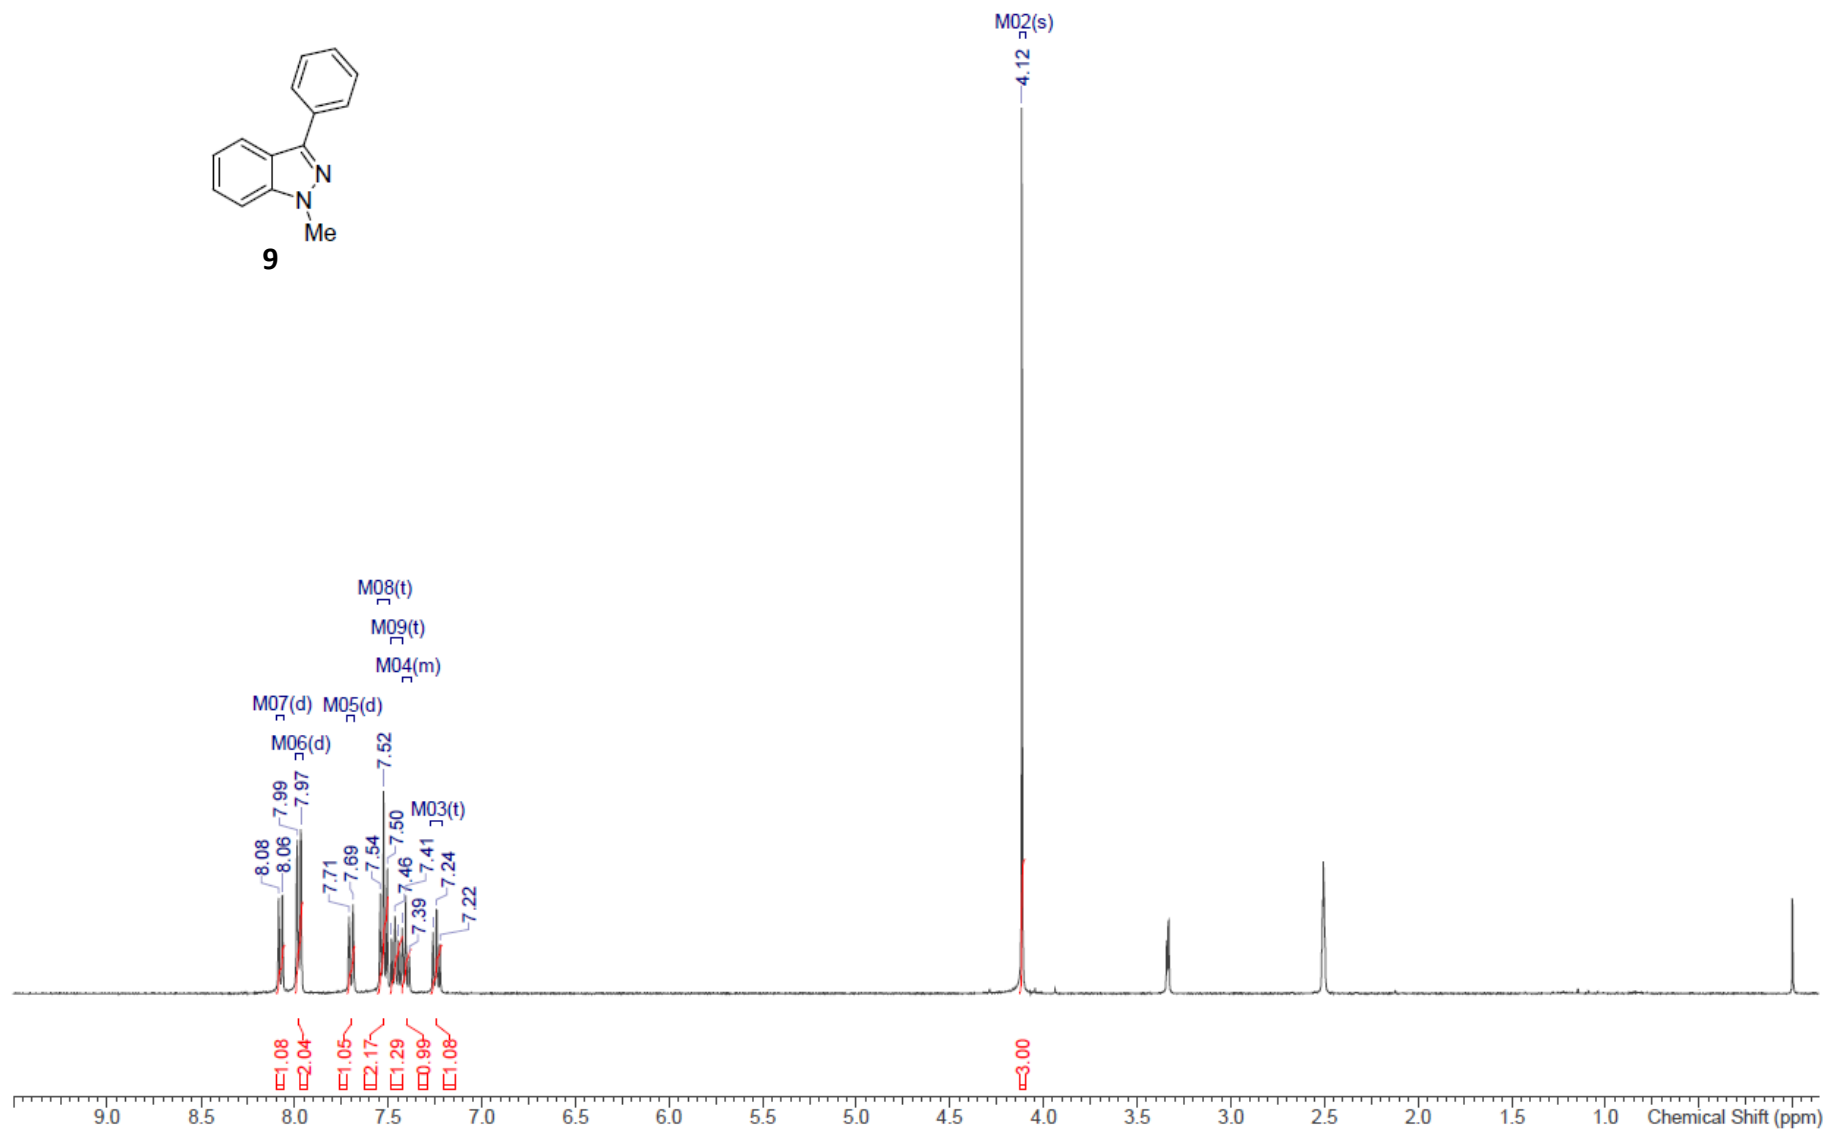

$^{13}\text{C}$  NMR (100 MHz, DMSO- $d_6$ )

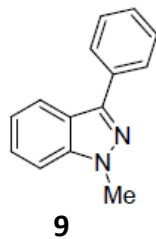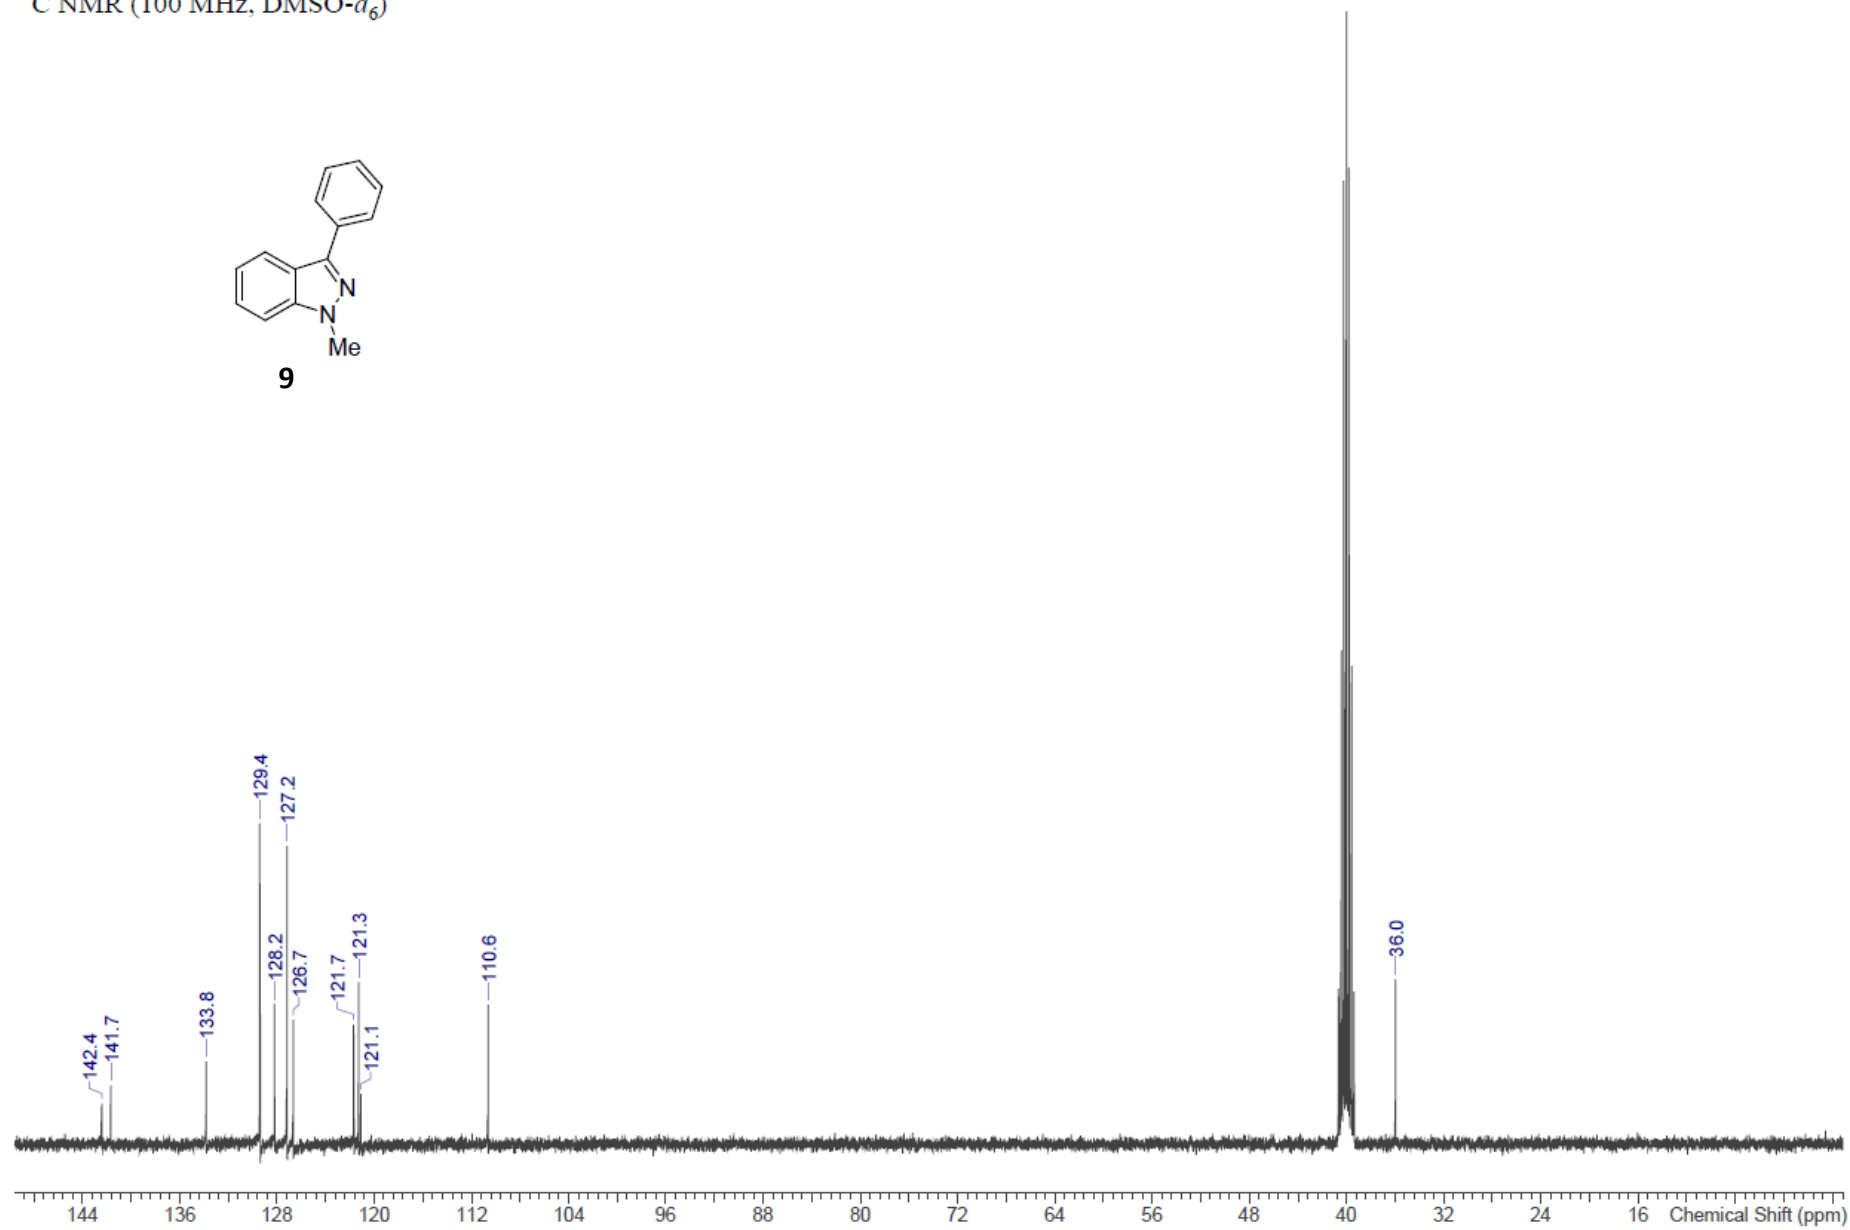

$^1\text{H}$  NMR (400 MHz,  $\text{DMSO-}d_6$ ): 4.20 (3 H, s) 7.20 (1 H, t,  $J=7.5$  Hz) 7.46 - 7.69 (5 H, m) 7.76 (2 H, d,  $J=7.7$  Hz) 8.04 (2 H, d,  $J=8.1$  Hz) 8.29 (1 H, d,  $J=8.3$  Hz)

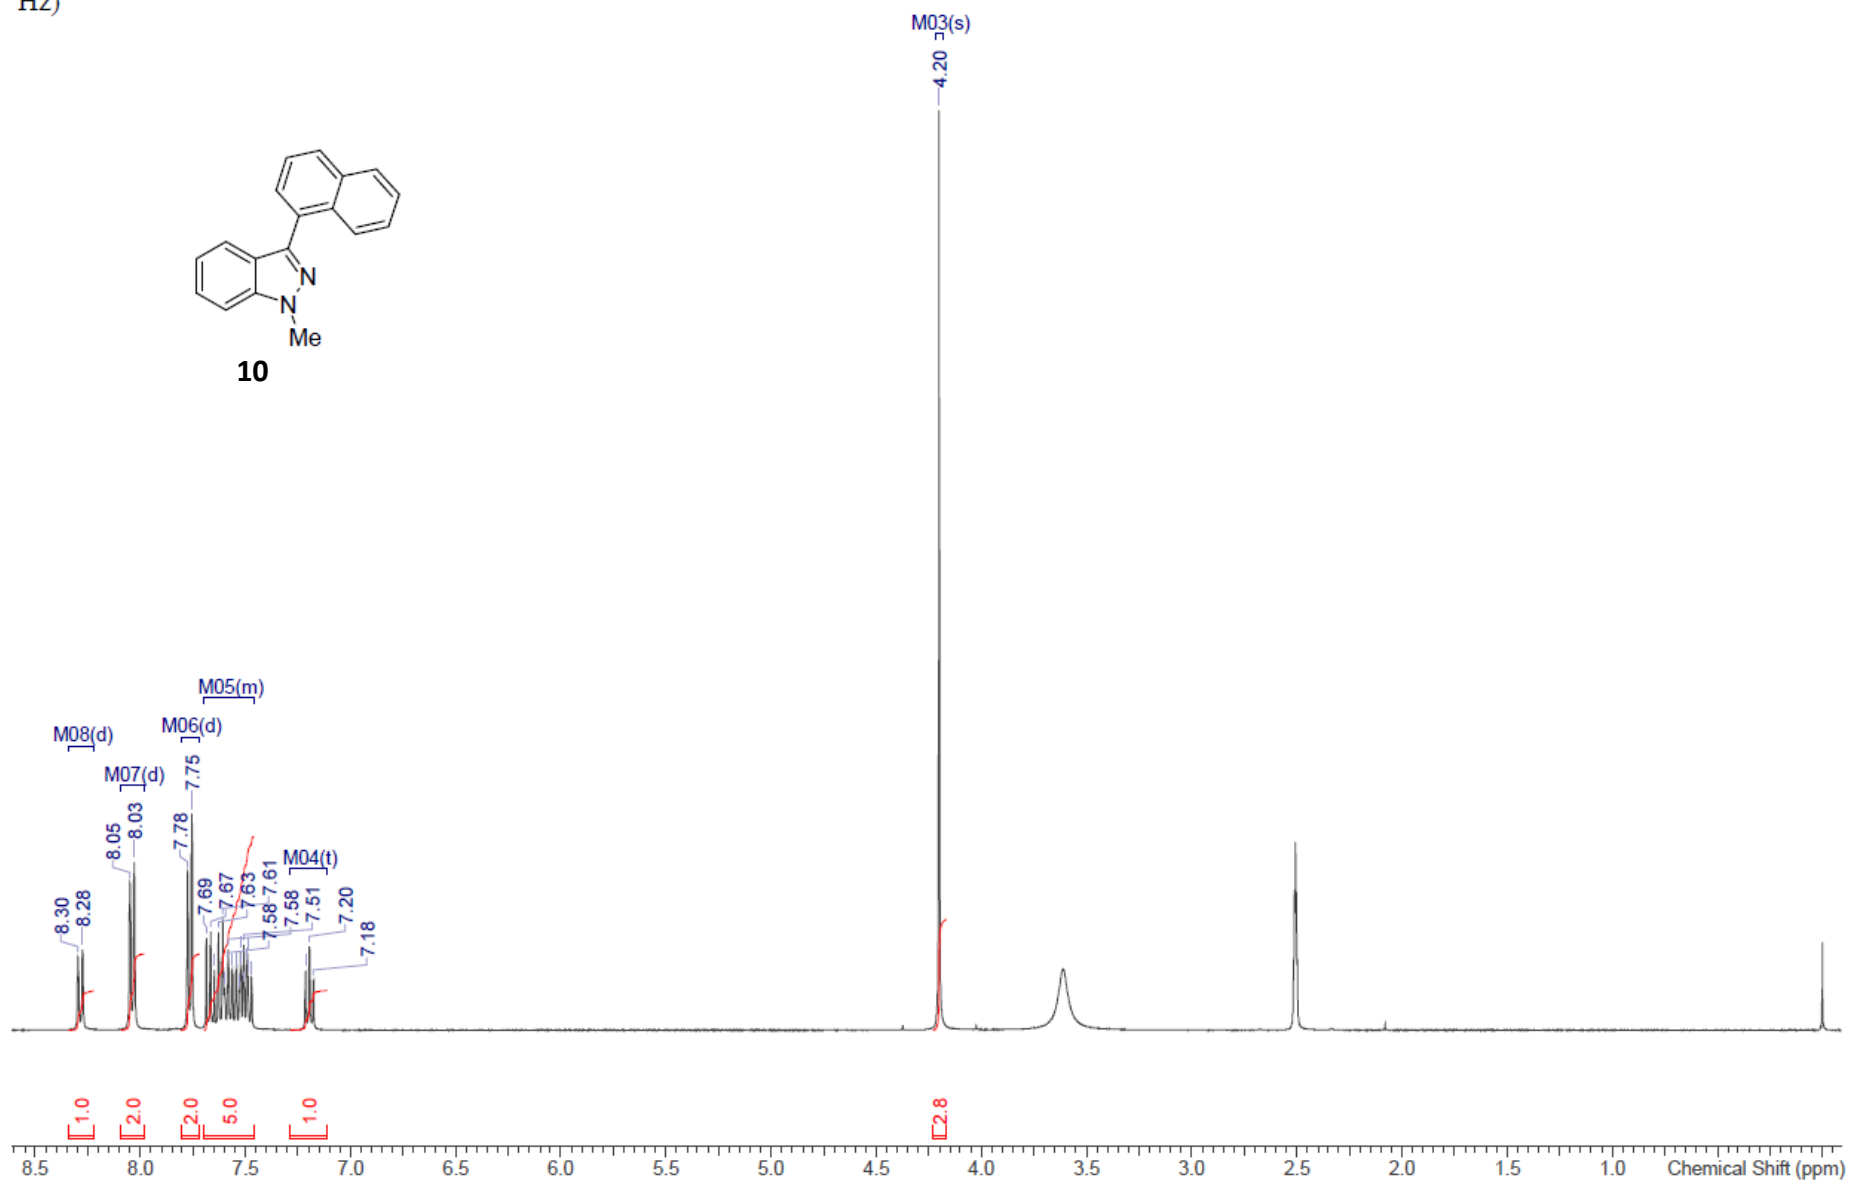

$^{13}\text{C}$  NMR (100 MHz,  $\text{DMSO-}d_6$ )

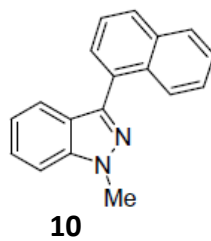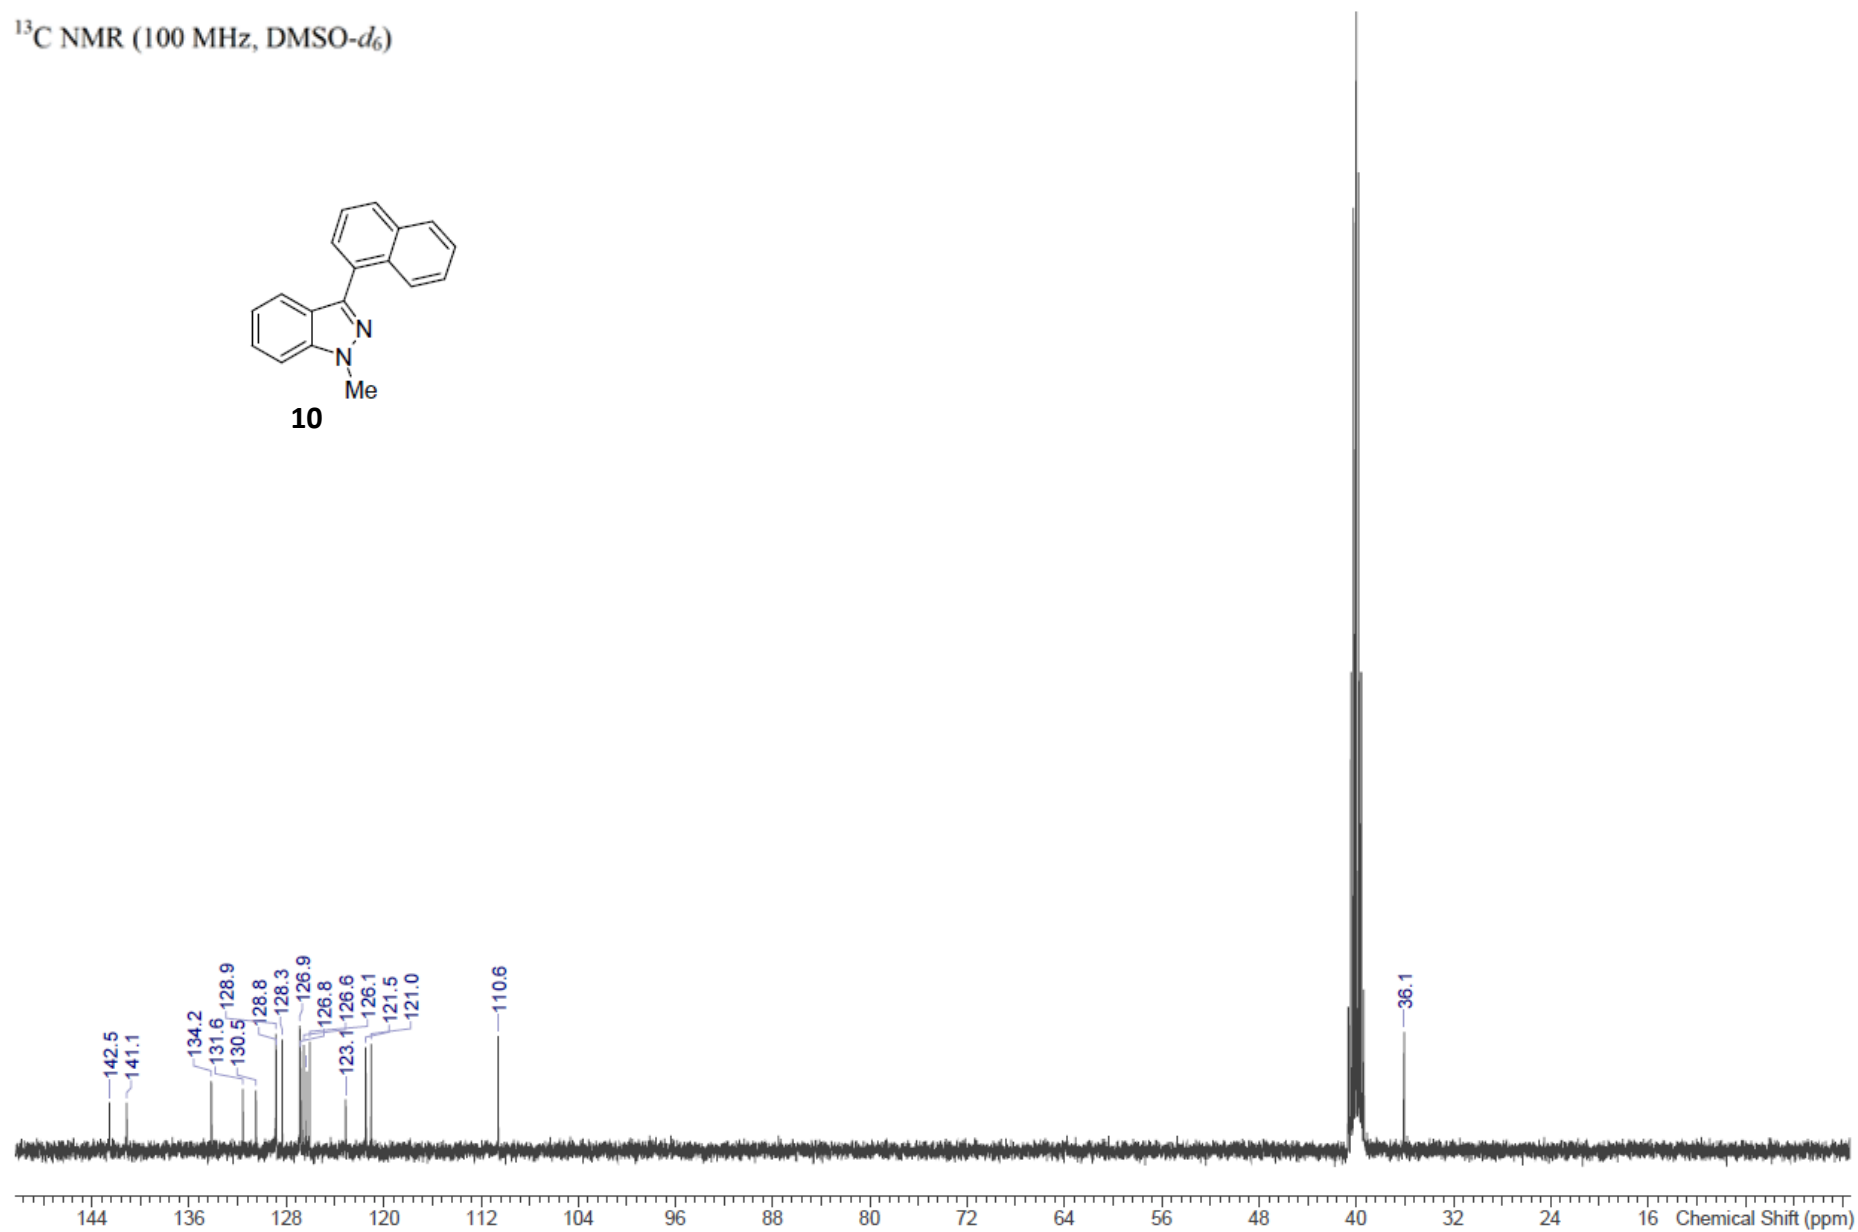

<sup>1</sup>H NMR (400 MHz, DMSO-*d*<sub>6</sub>): 0.90 (6 H, t, *J*=7.5 Hz) 2.15 - 2.24 (2 H, m) 2.24 - 2.34 (2 H, m) 4.10 (3 H, s) 7.10 (1 H, t, *J*=7.1 Hz) 7.20 (2 H, d, *J*=7.7 Hz) 7.26 (1 H, d, *J*=8.2 Hz) 7.36 (1 H, t, *J*=7.7 Hz) 7.40 - 7.44 (1 H, m) 7.68 (1 H, d, *J*=8.6 Hz)

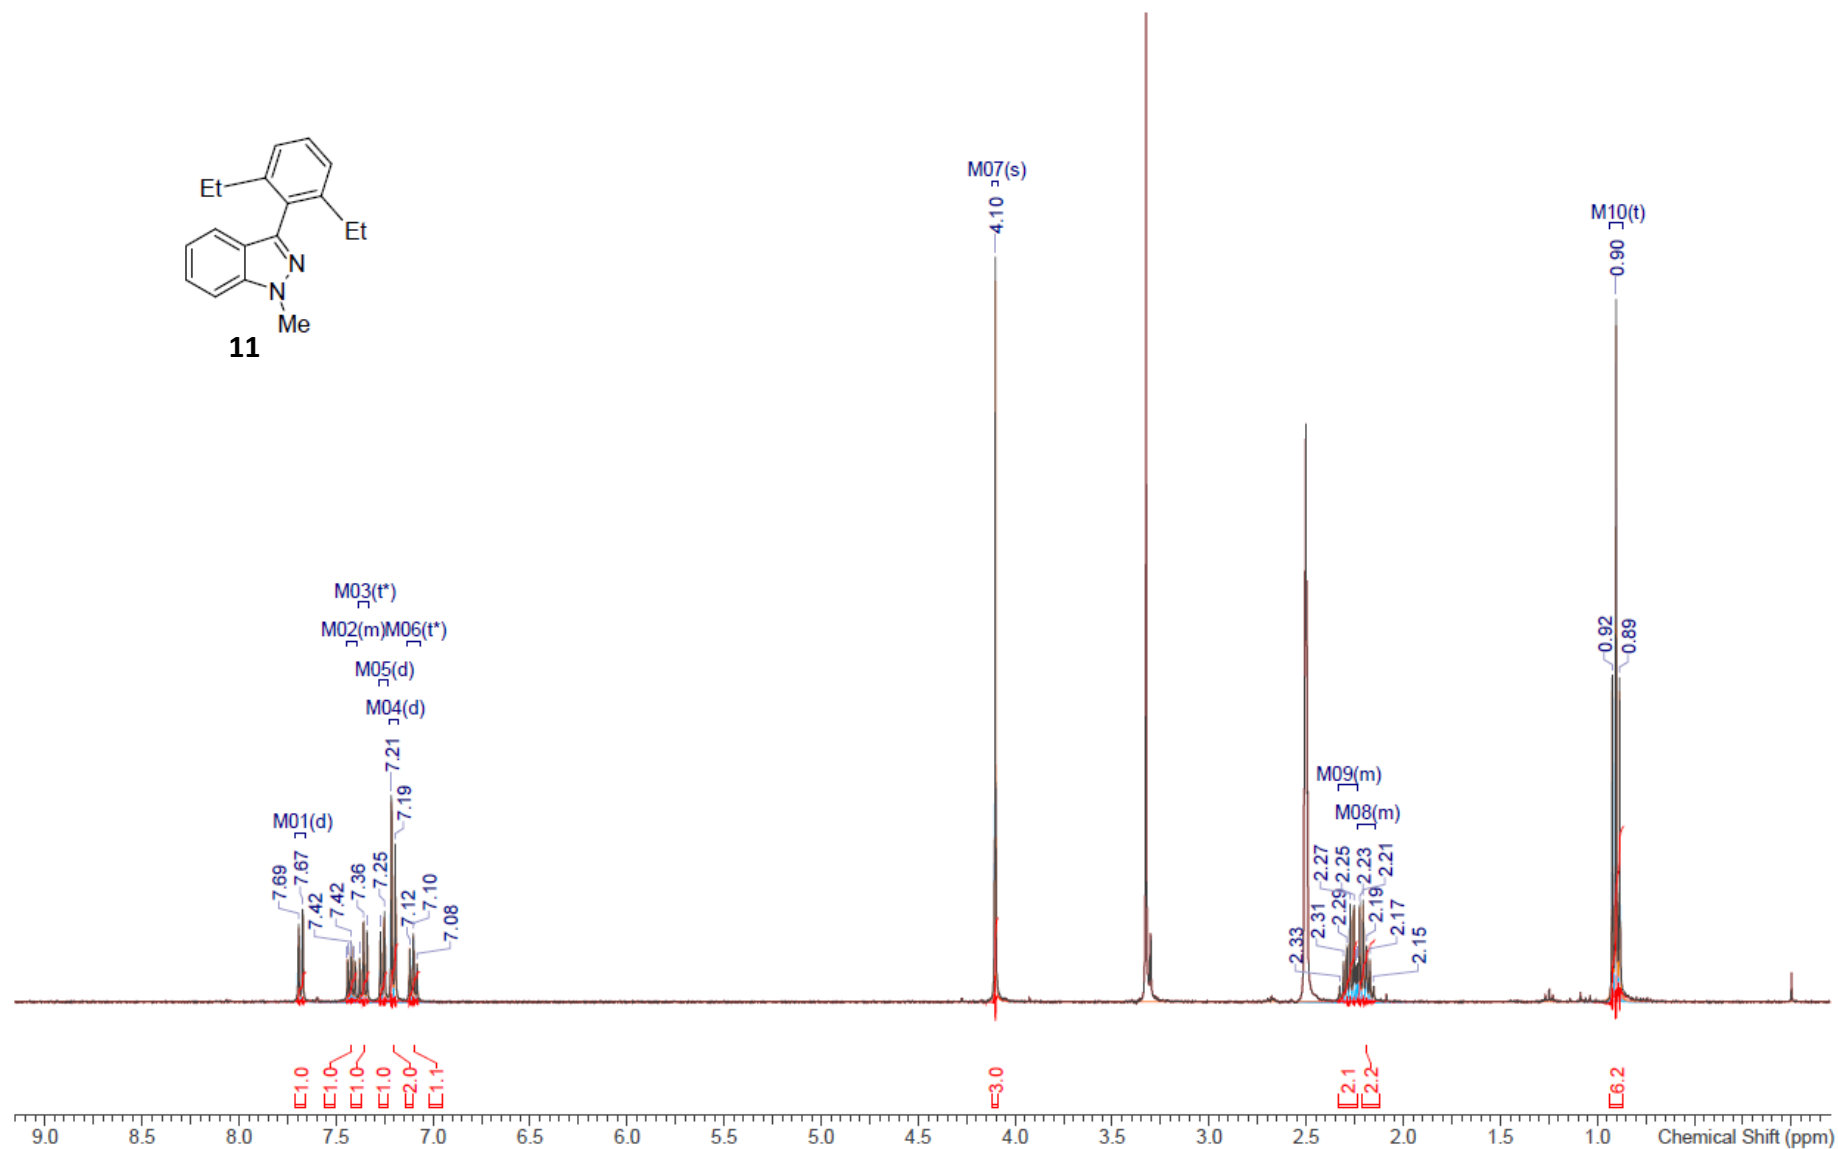



$^{13}\text{C}$  NMR (100 MHz,  $\text{DMSO-}d_6$ )

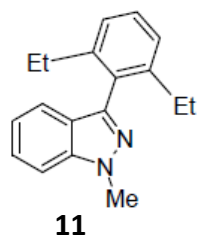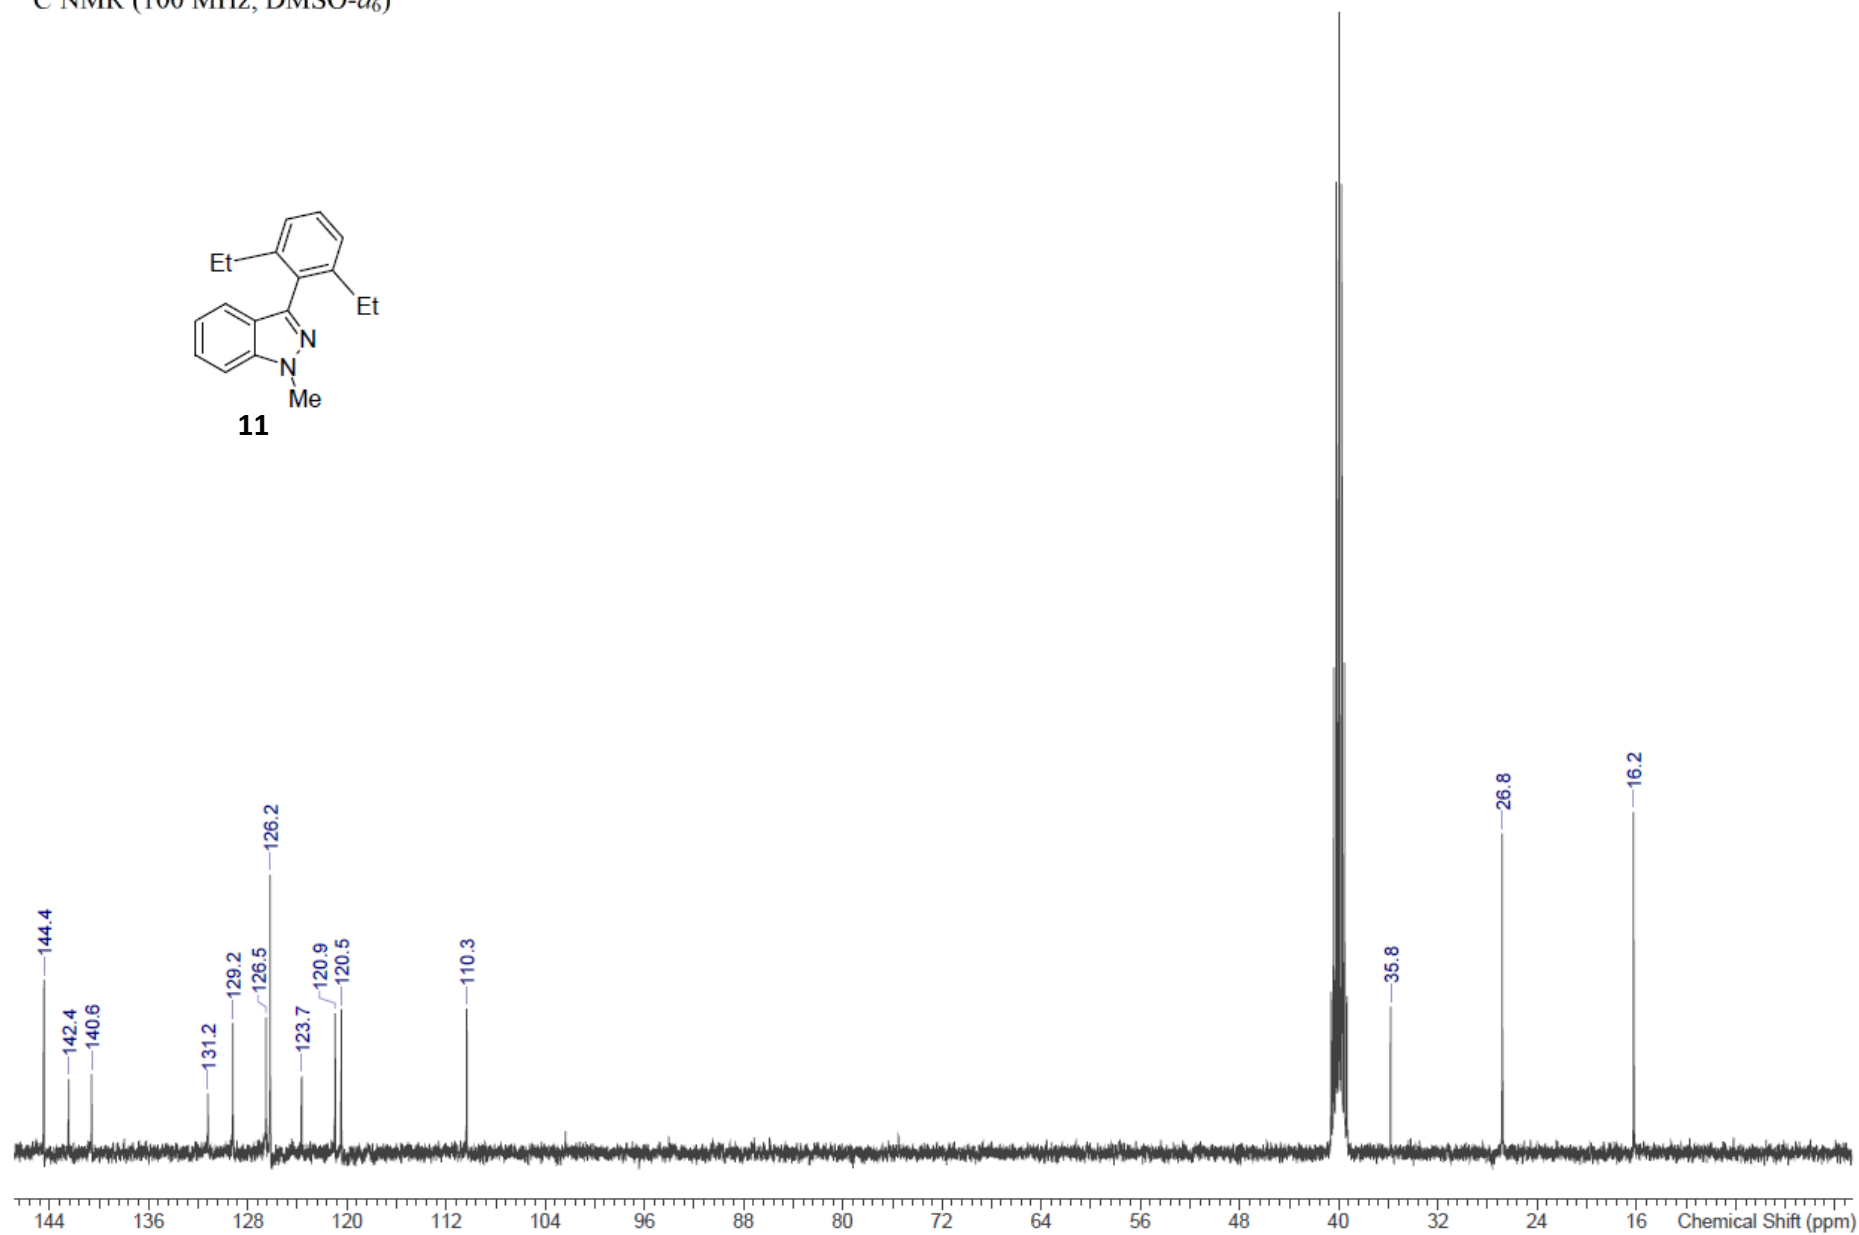

$^1\text{H}$  NMR (400 MHz,  $\text{DMSO}-d_6$ ): 3.83 (3 H, s) 4.09 (3 H, s) 7.03 - 7.14 (2 H, m) 7.21 (1 H, t,  $J=7.5$  Hz) 7.45 (1 H, t,  $J=7.5$  Hz) 7.67 (1 H, d,  $J=8.3$  Hz) 7.84 - 7.96 (2 H, m) 8.03 (1 H, d,  $J=7.8$  Hz).

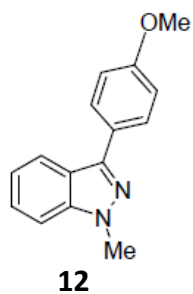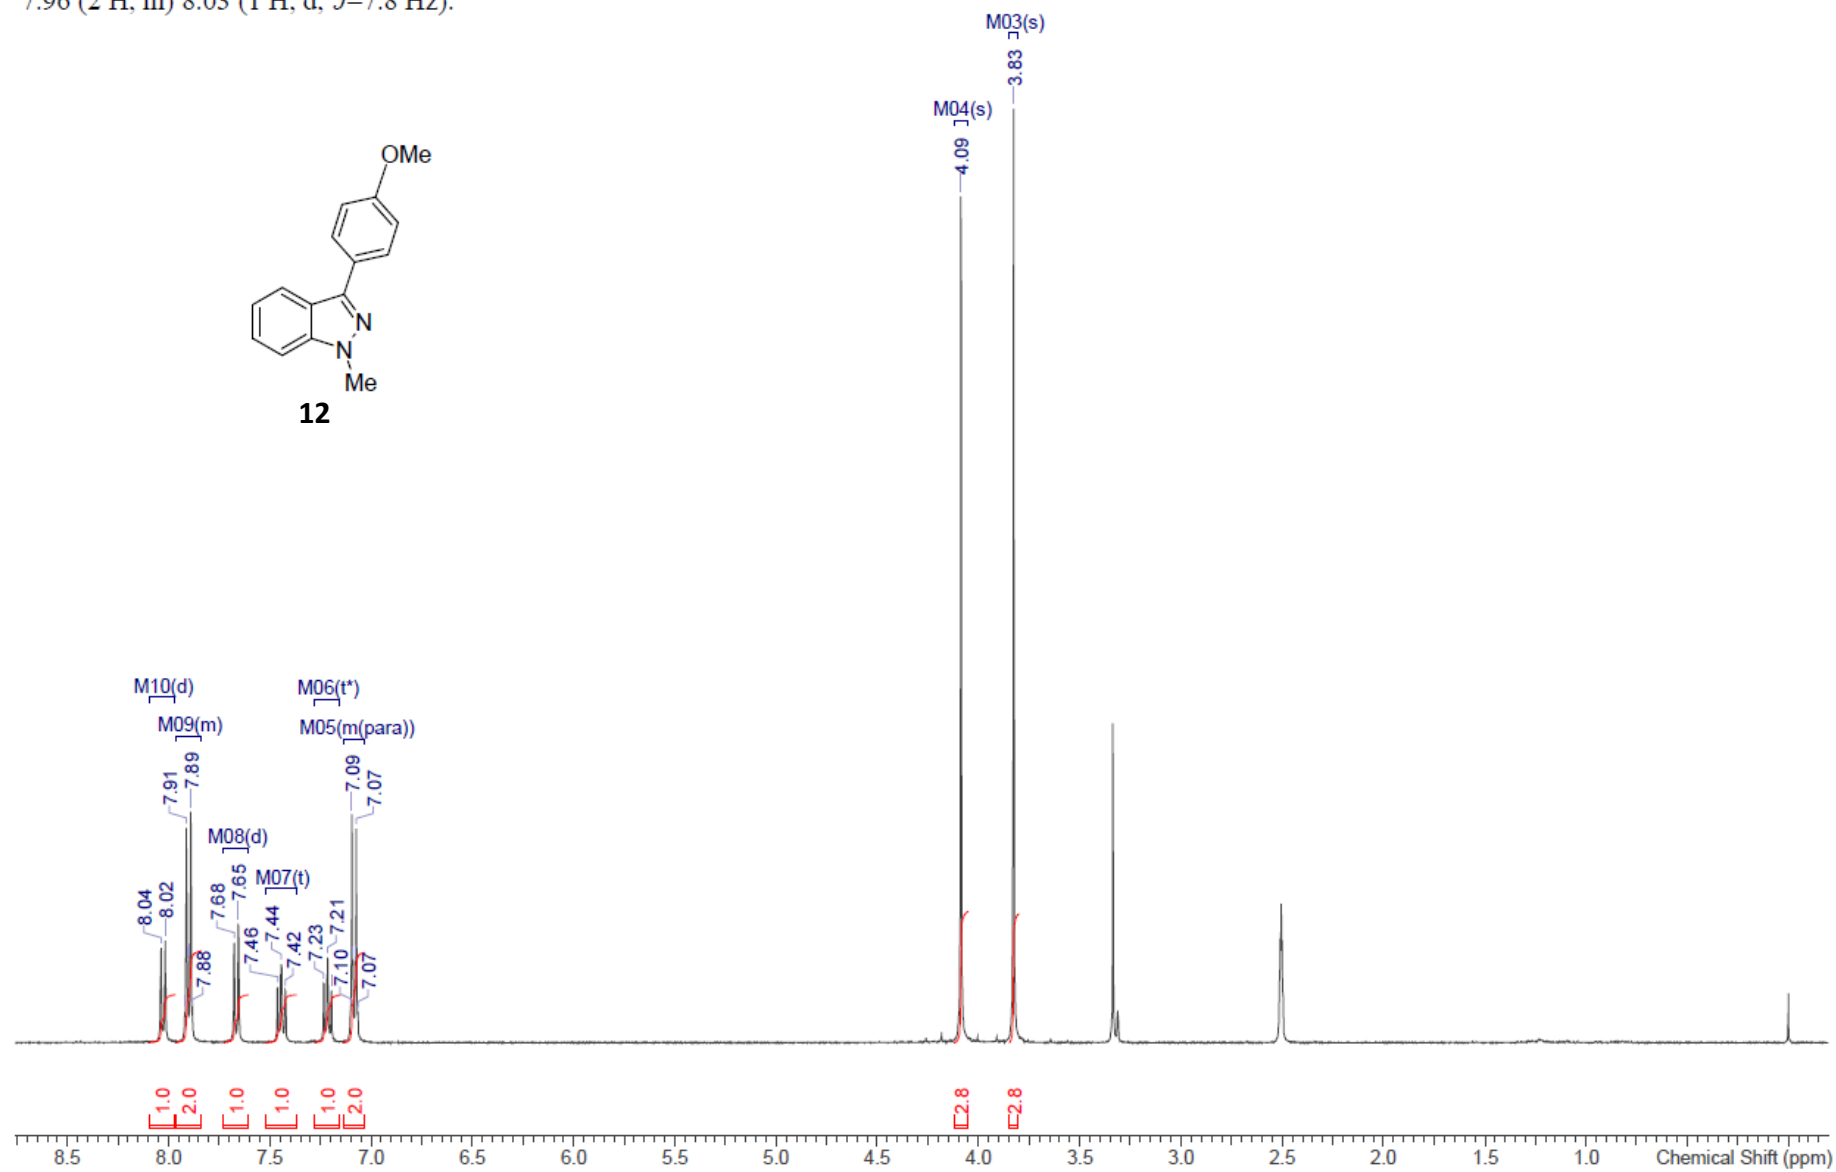

$^{13}\text{C}$  NMR (100 MHz,  $\text{DMSO-}d_6$ )

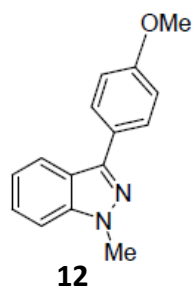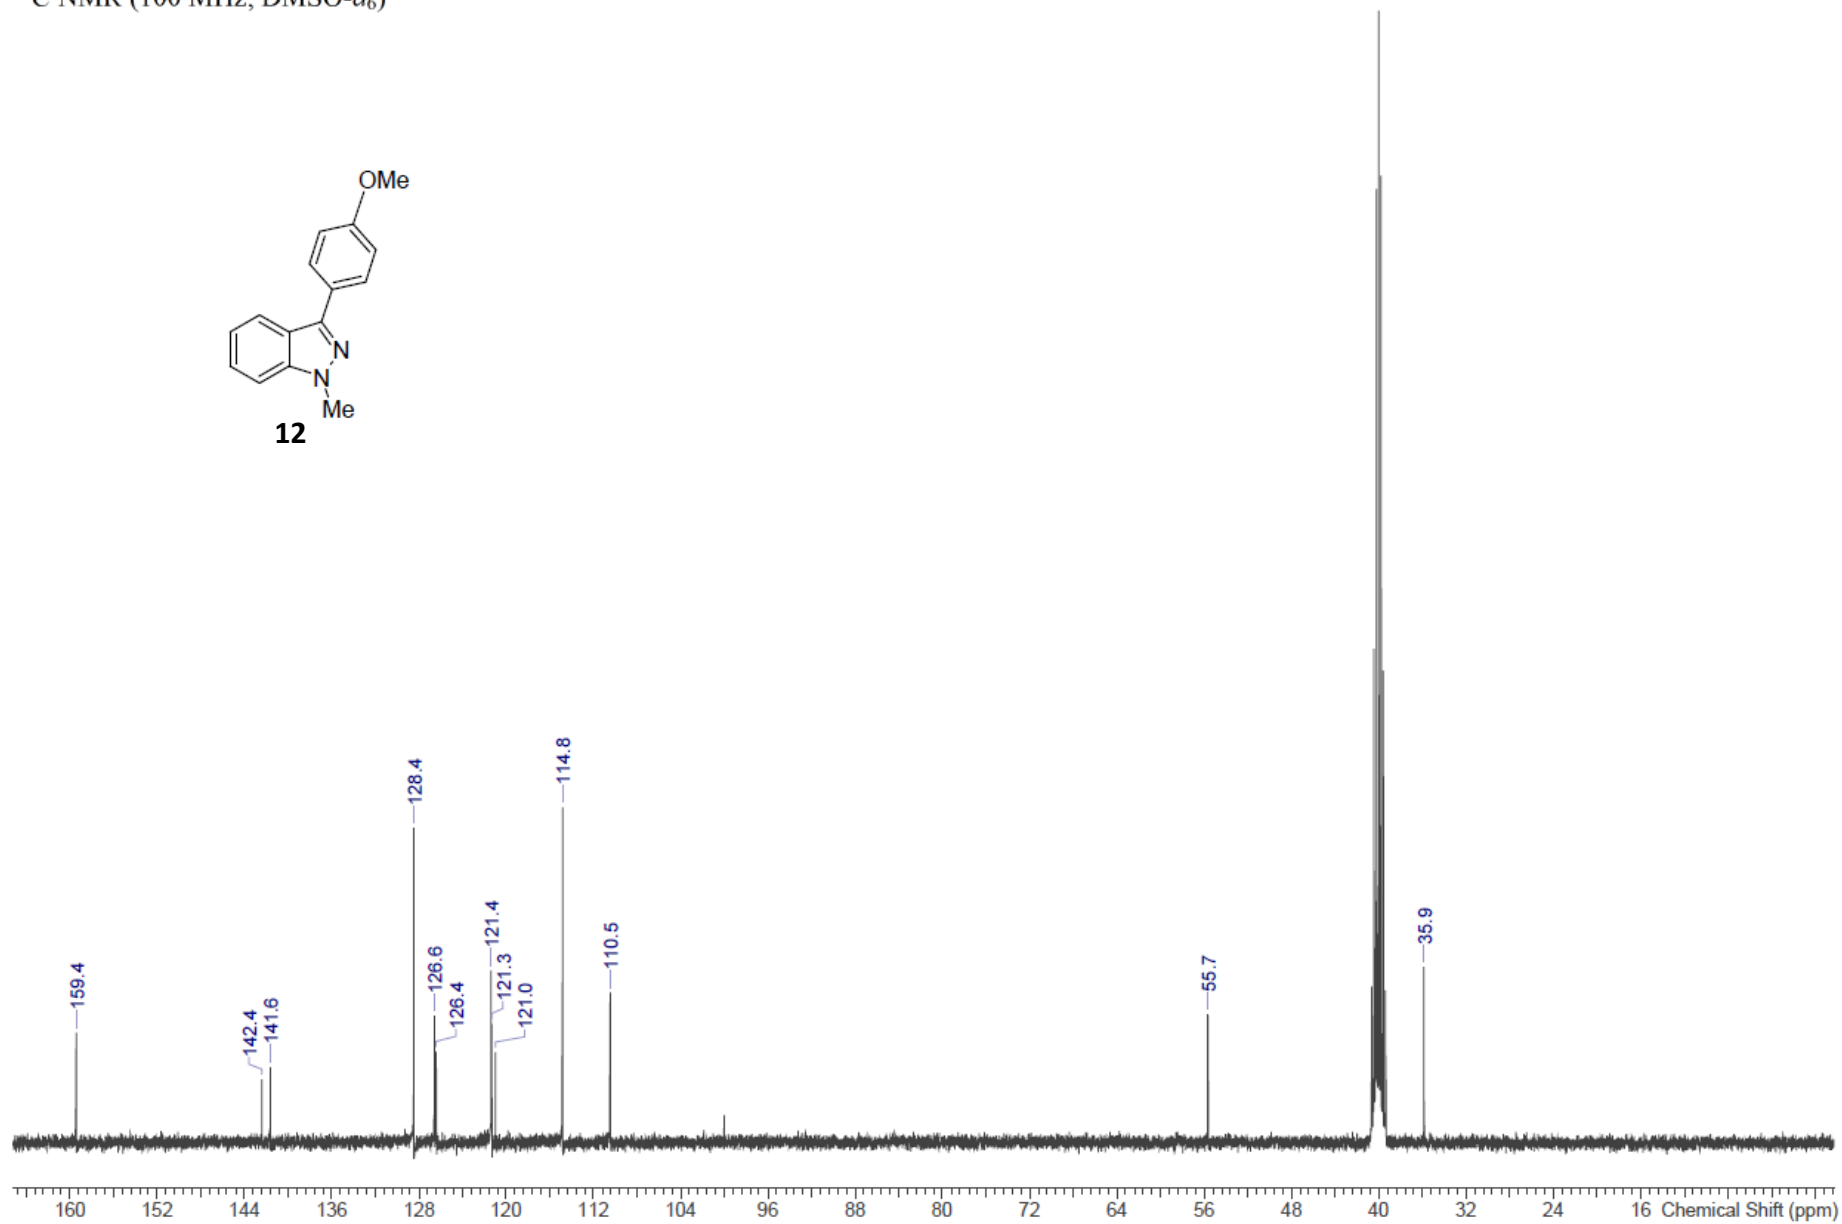

$^1\text{H}$  NMR (400 MHz,  $\text{DMSO-}d_6$ )  $\delta$  ppm 3.84 (6 H, s) 4.11 (3 H, s) 6.55 (1 H, t,  $J=2.2$  Hz) 7.06 (2 H, d,  $J=2.4$  Hz) 7.24 (1 H, t,  $J=7.6$  Hz) 7.42 - 7.50 (1 H, m) 7.70 (1 H, d,  $J=8.3$  Hz) 8.04 (1 H, d,  $J=7.8$  Hz)

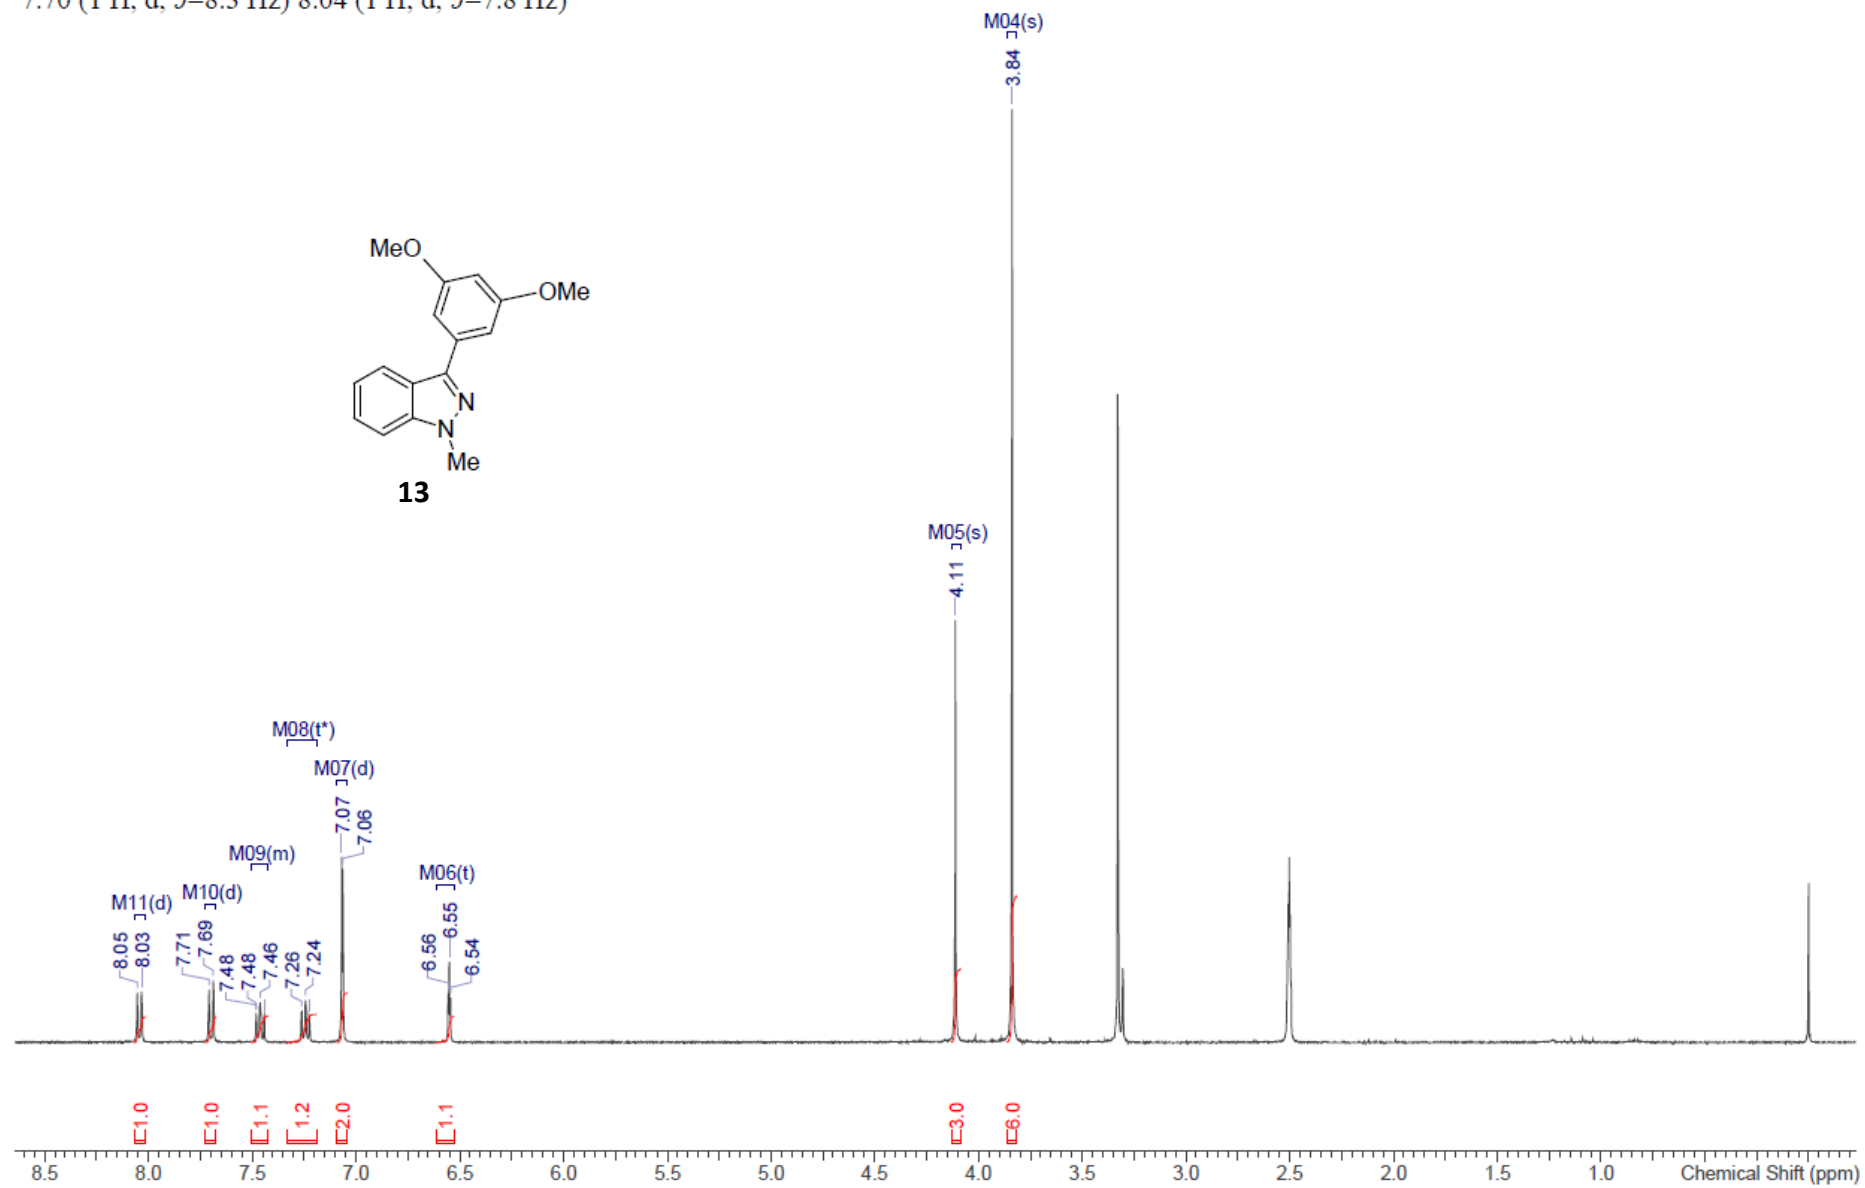

$^{13}\text{C}$  NMR (100 MHz,  $\text{DMSO-}d_6$ )

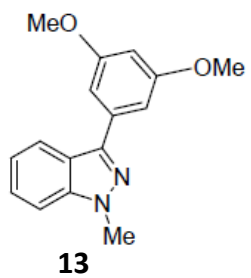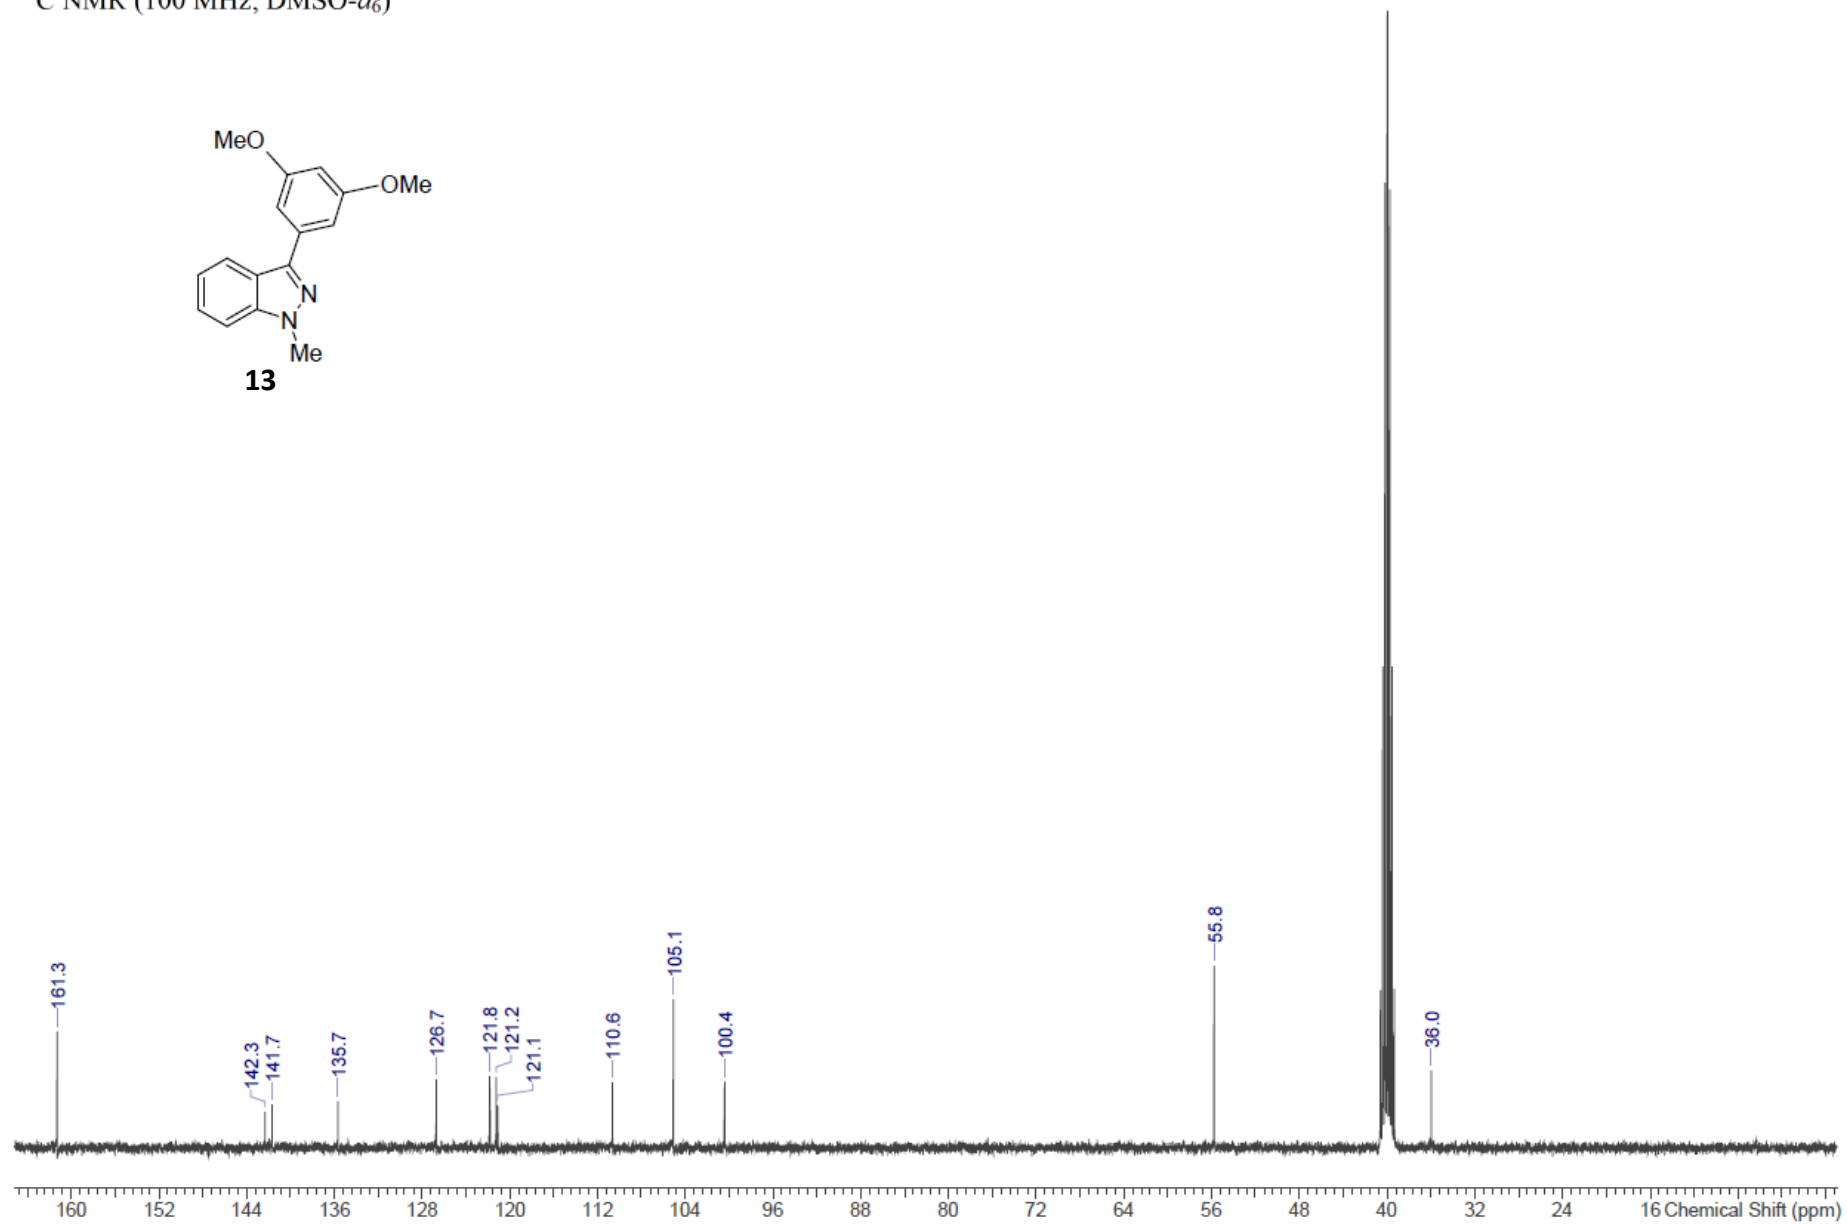

$^1\text{H}$  NMR (400 MHz,  $\text{DMSO}-d_6$ ): 4.06 (3 H, s) 6.93 (2 H, d,  $J=8.6$  Hz) 7.18 (1 H, t,  $J=7.5$  Hz) 7.42 (1 H, t,  $J=7.6$  Hz) 7.62 (1 H, d,  $J=8.6$  Hz) 7.80 (2 H, d,  $J=8.6$  Hz) 8.00 (1 H, d,  $J=8.2$  Hz) 9.65 (1 H, s).

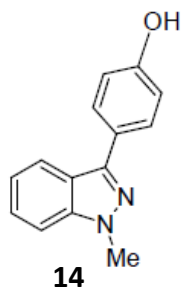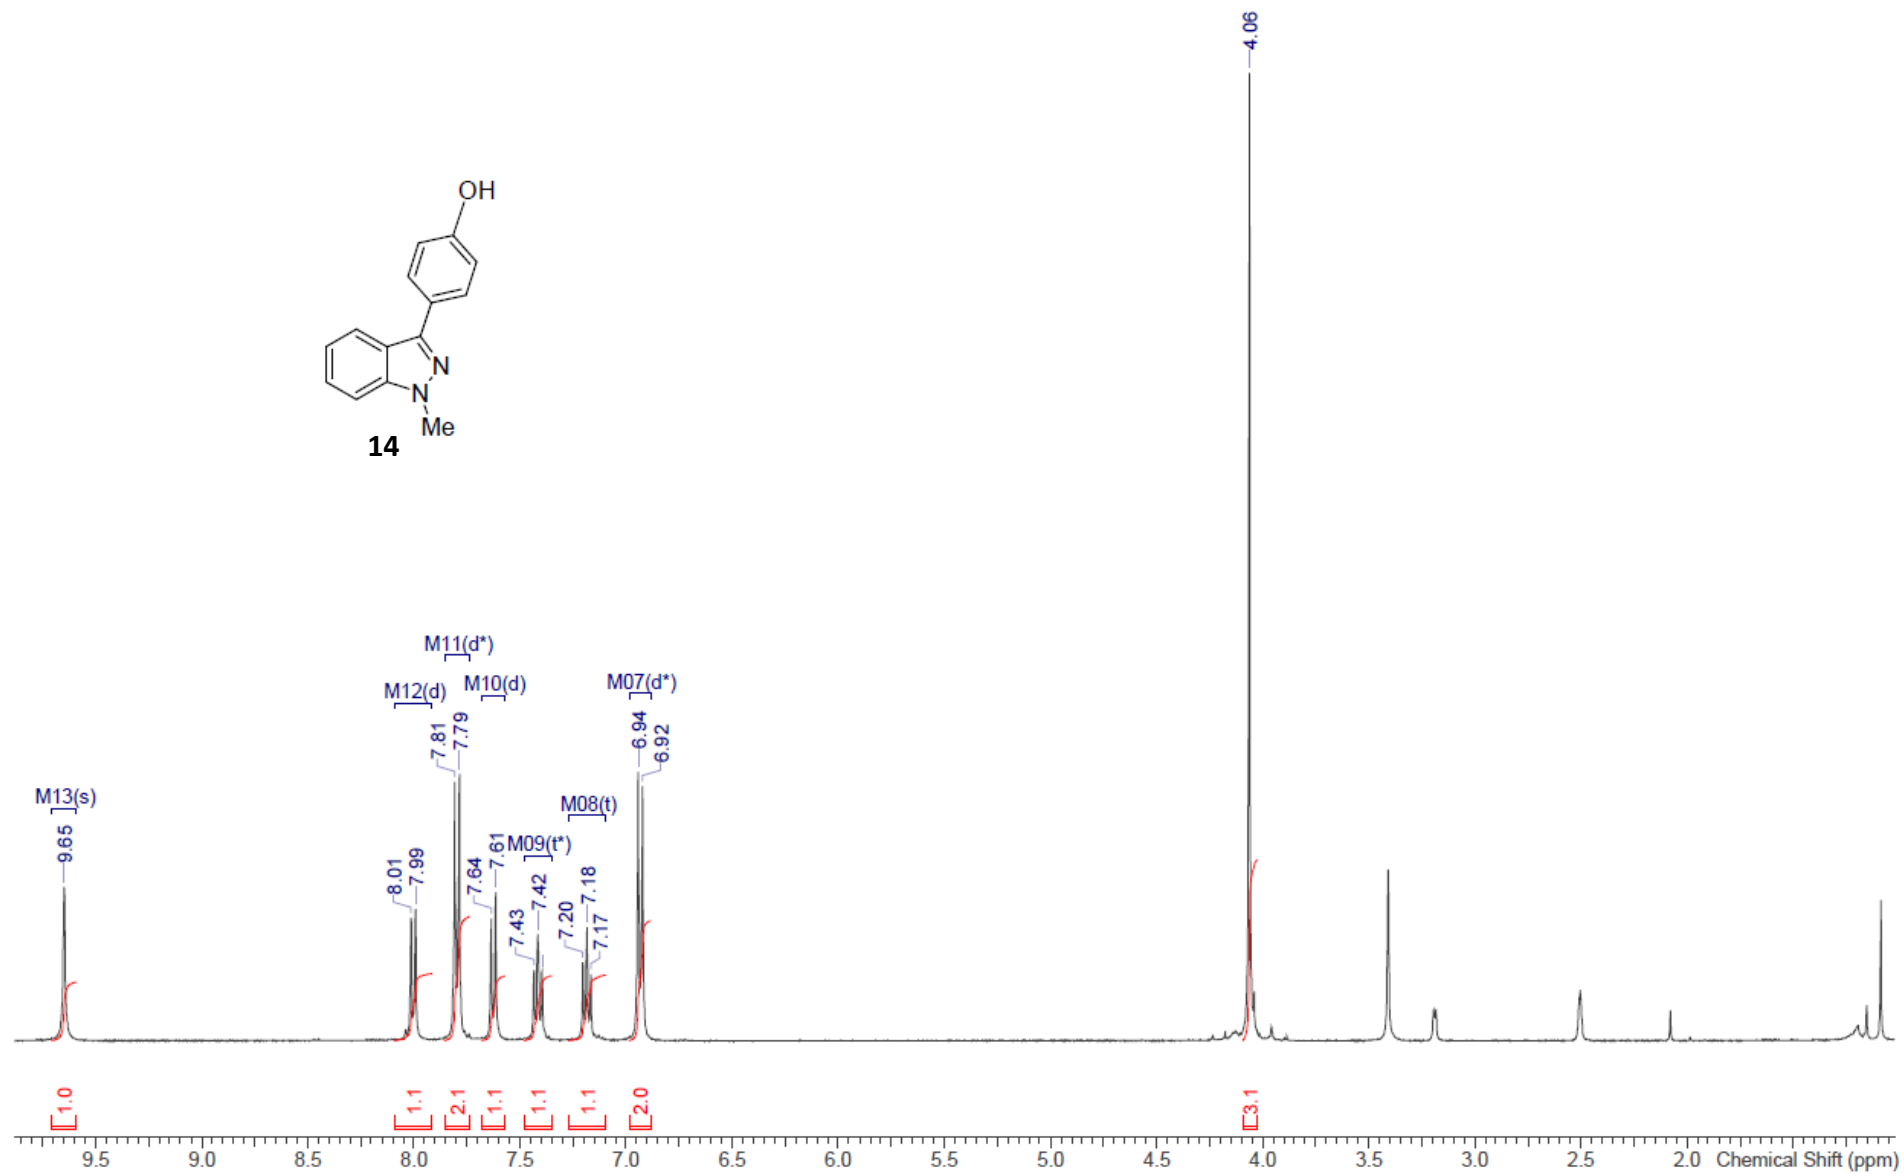

$^{13}\text{C}$  NMR (100 MHz,  $\text{DMSO-}d_6$ )

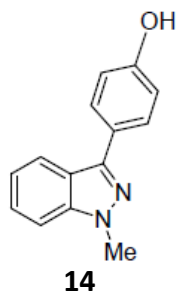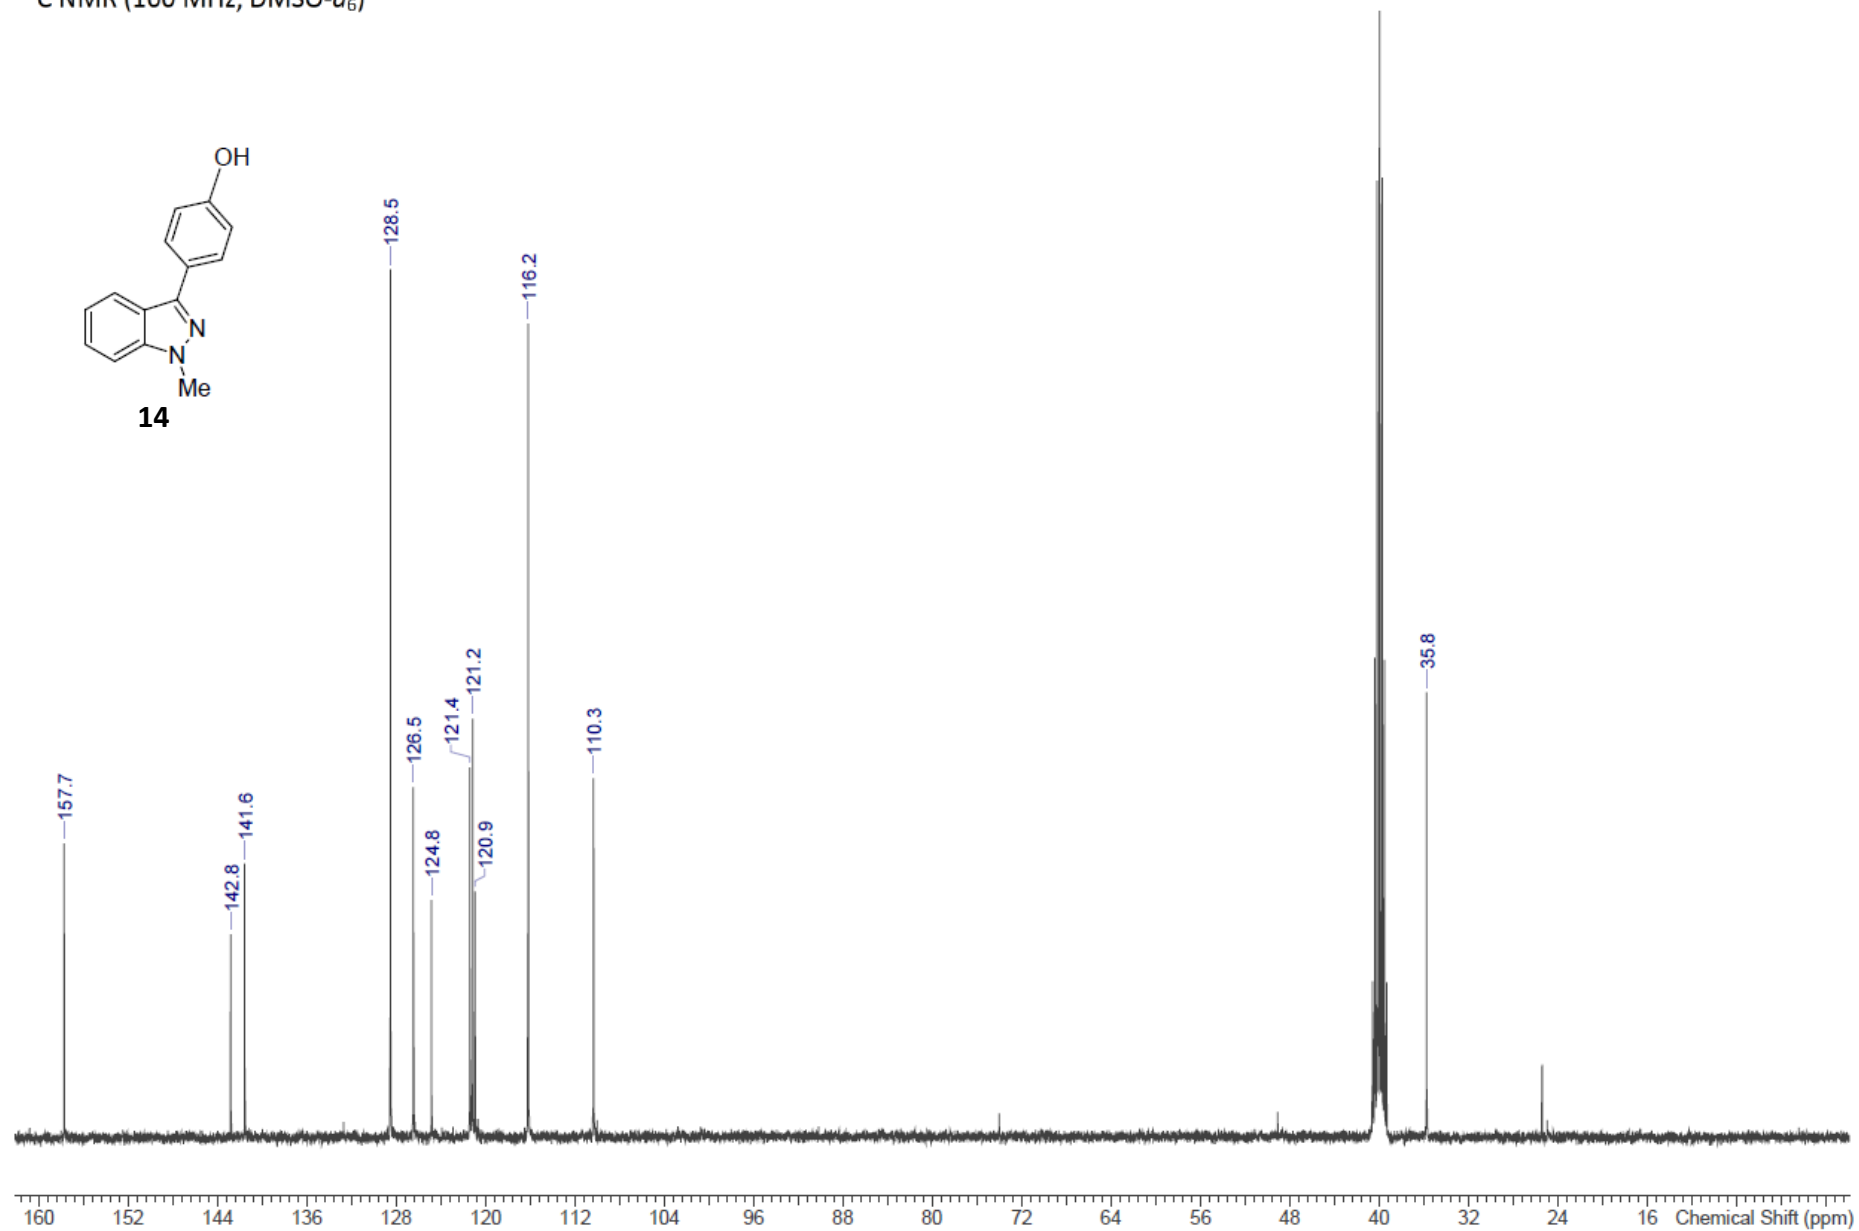

$^1\text{H}$  NMR (400 MHz,  $\text{DMSO-}d_6$ )  $\delta$  ppm 4.14 (3 H, s) 7.26 (1 H, t,  $J=7.5$  Hz) 7.35 (1 H, t,  $J=6.2$  Hz) 7.46 (1 H, t,  $J=7.6$  Hz) 7.69 (1 H, d,  $J=8.6$  Hz) 7.88 (1 H, td,  $J=7.8, 1.7$  Hz) 8.13 (1 H, d,  $J=7.9$  Hz) 8.59 (1 H, d,  $J=8.2$  Hz) 8.72 (1 H, d,  $J=4.8$  Hz)

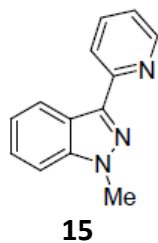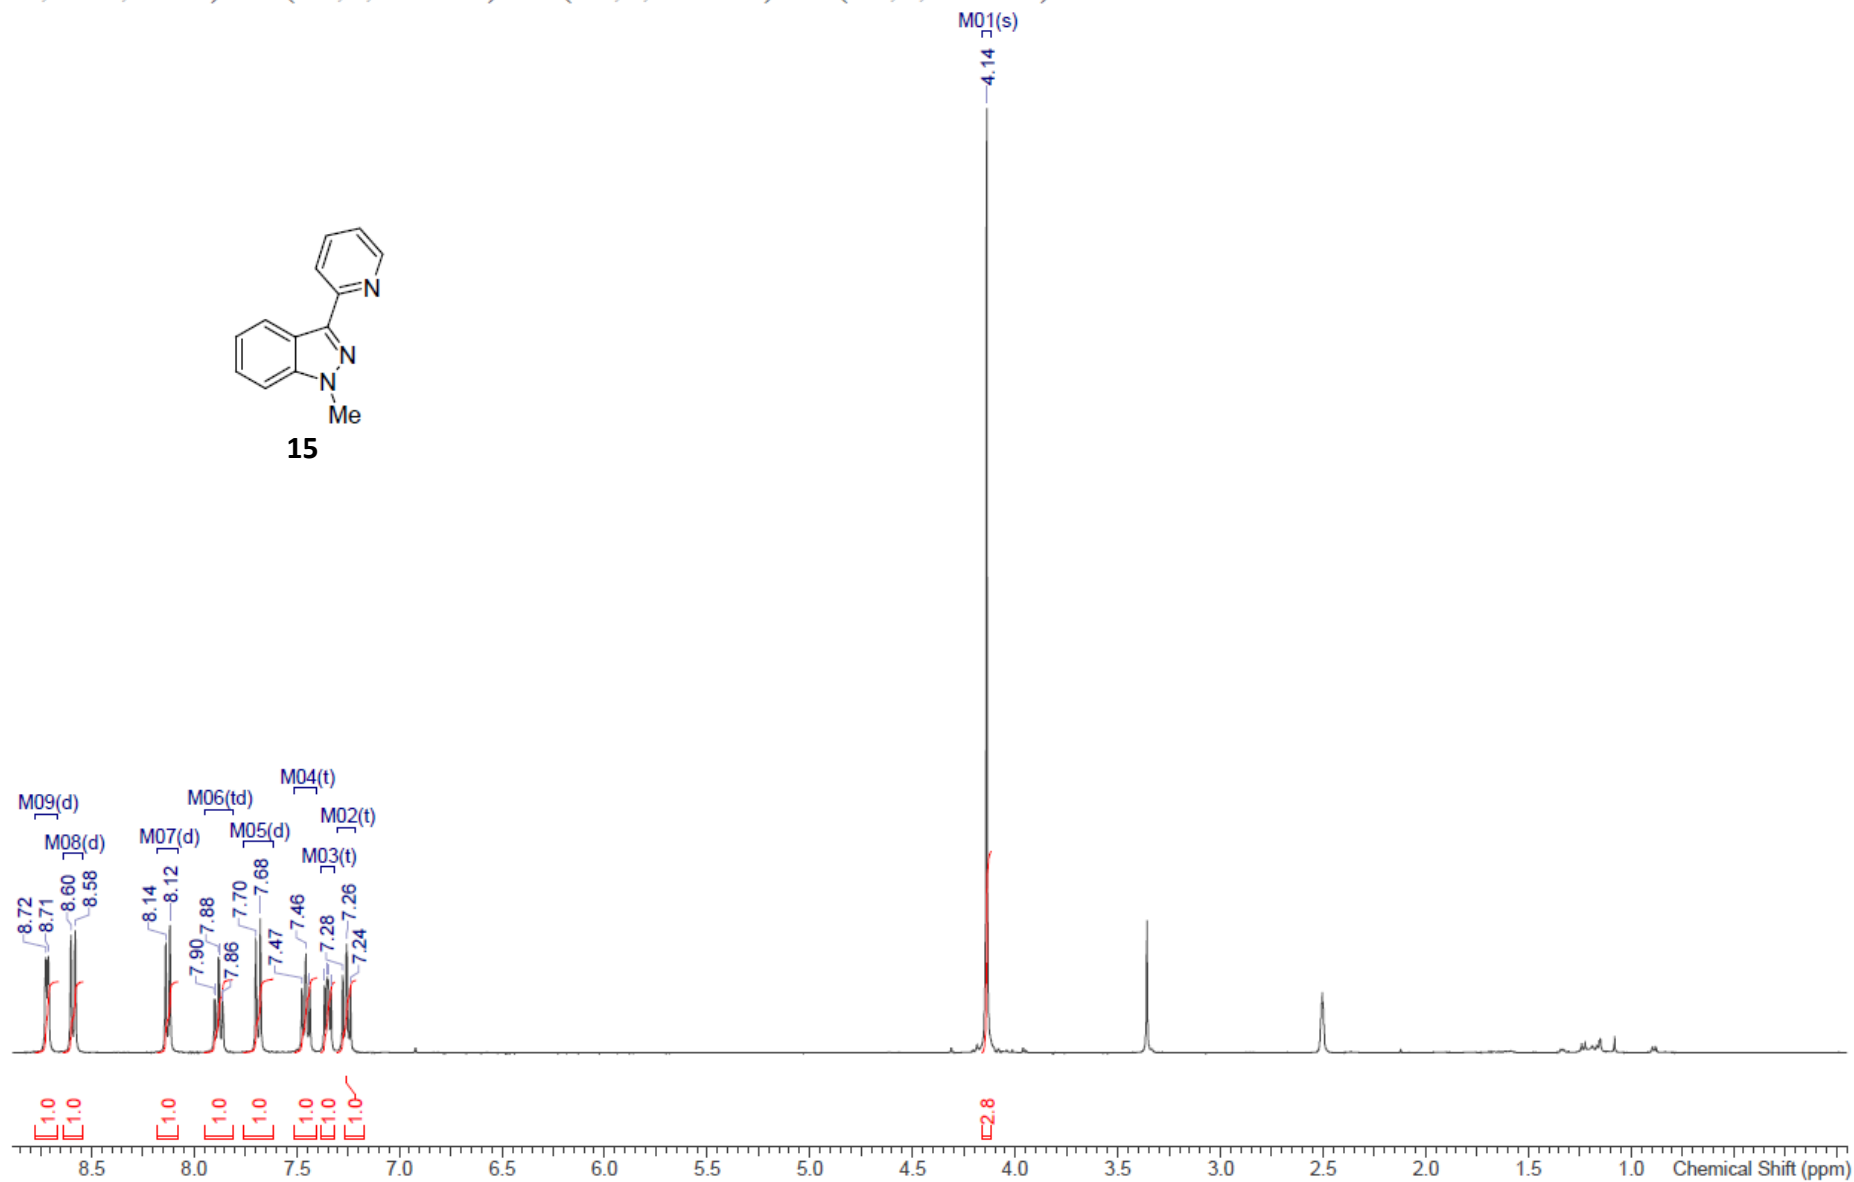



$^{13}\text{C}$  NMR (100 MHz,  $\text{DMSO-}d_6$ )

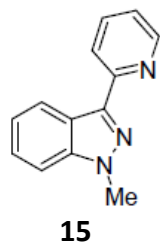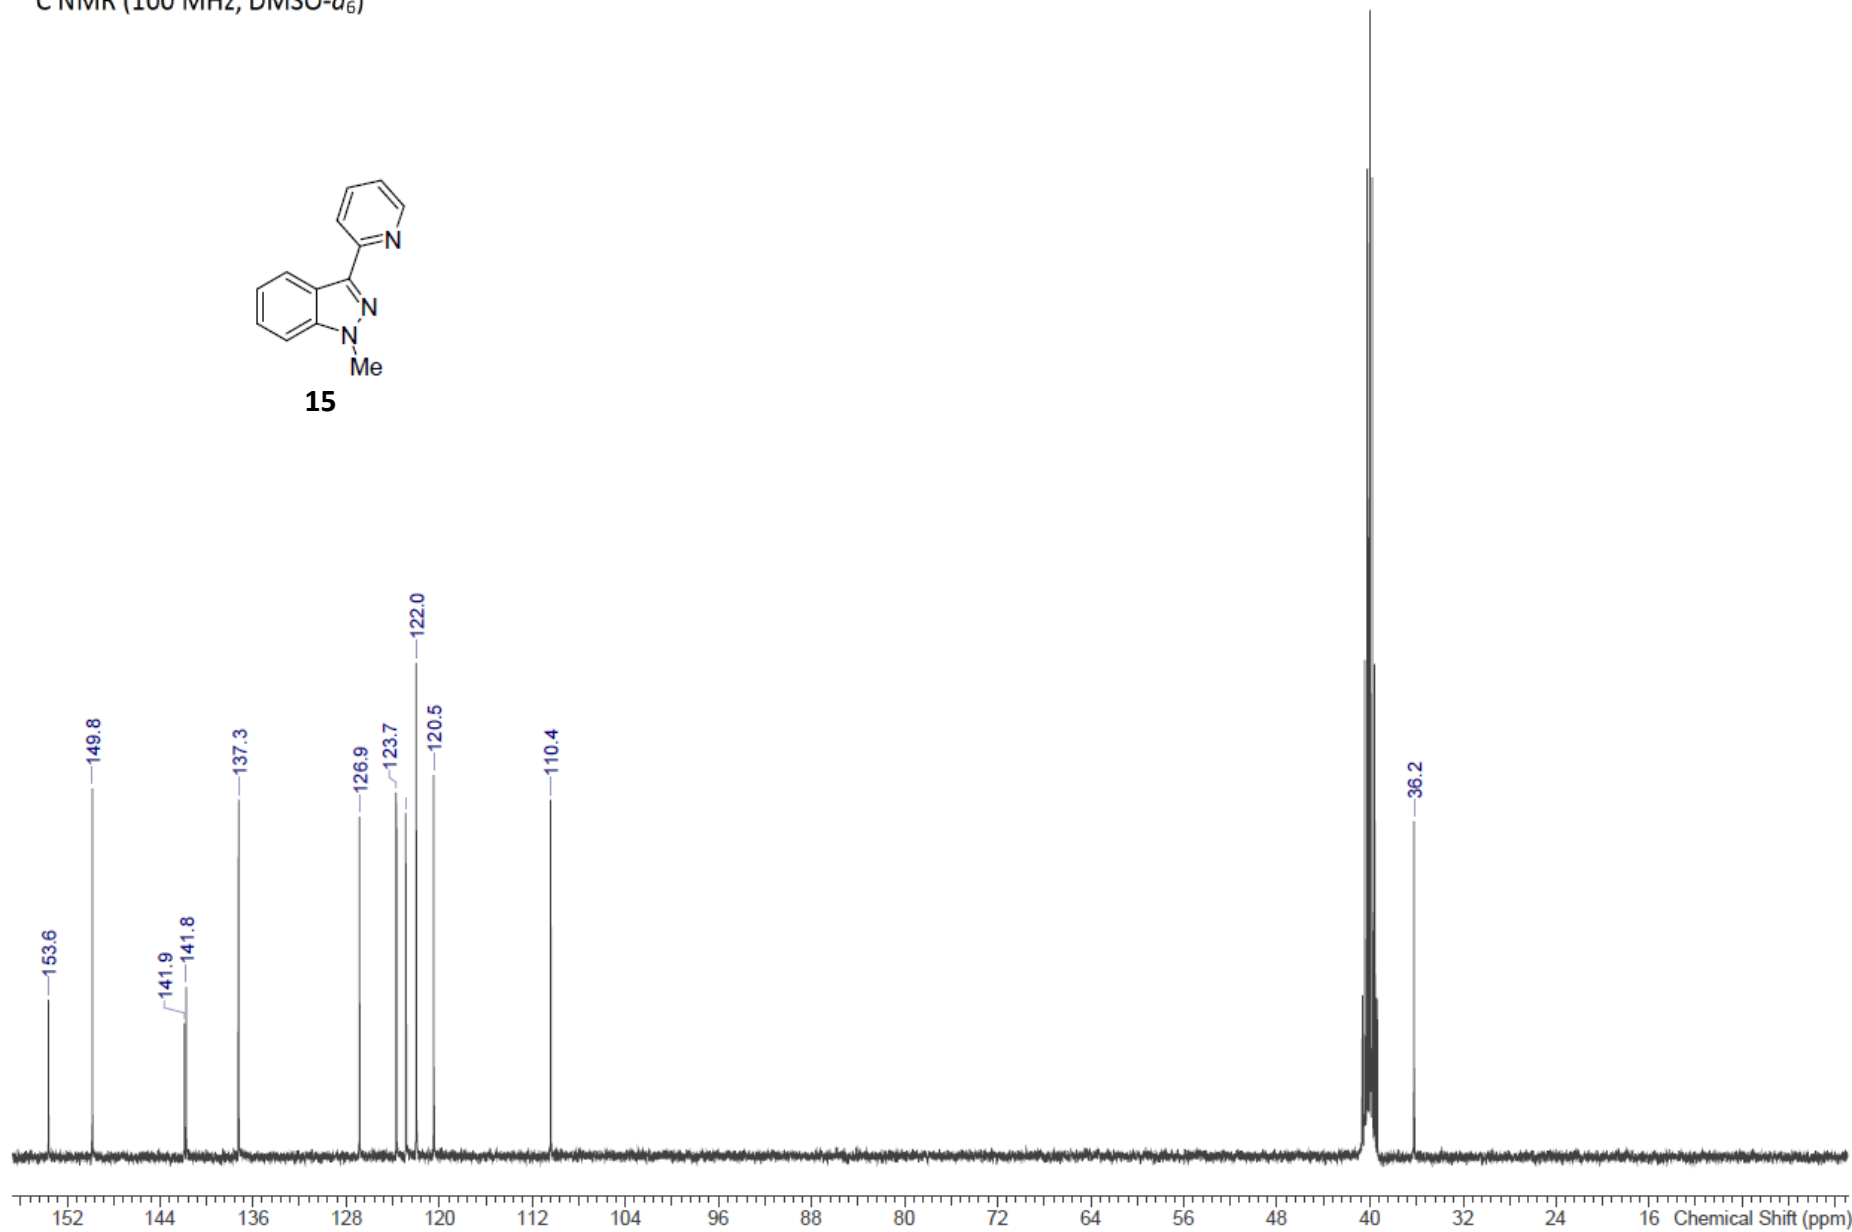

$^1\text{H}$  NMR (500 MHz,  $\text{CDCl}_3$ ): 4.23 (3 H, s) 7.22 (1 H, t,  $J=4.8$  Hz) 7.32 (1 H, ddd,  $J=8.1, 4.7, 3.2$  Hz) 7.45 - 7.48 (1 H, m) 8.68 (1 H, d,  $J=8.2$  Hz) 8.89 (2 H, d,  $J=4.9$  Hz)

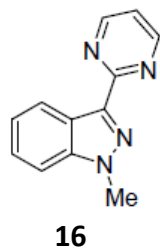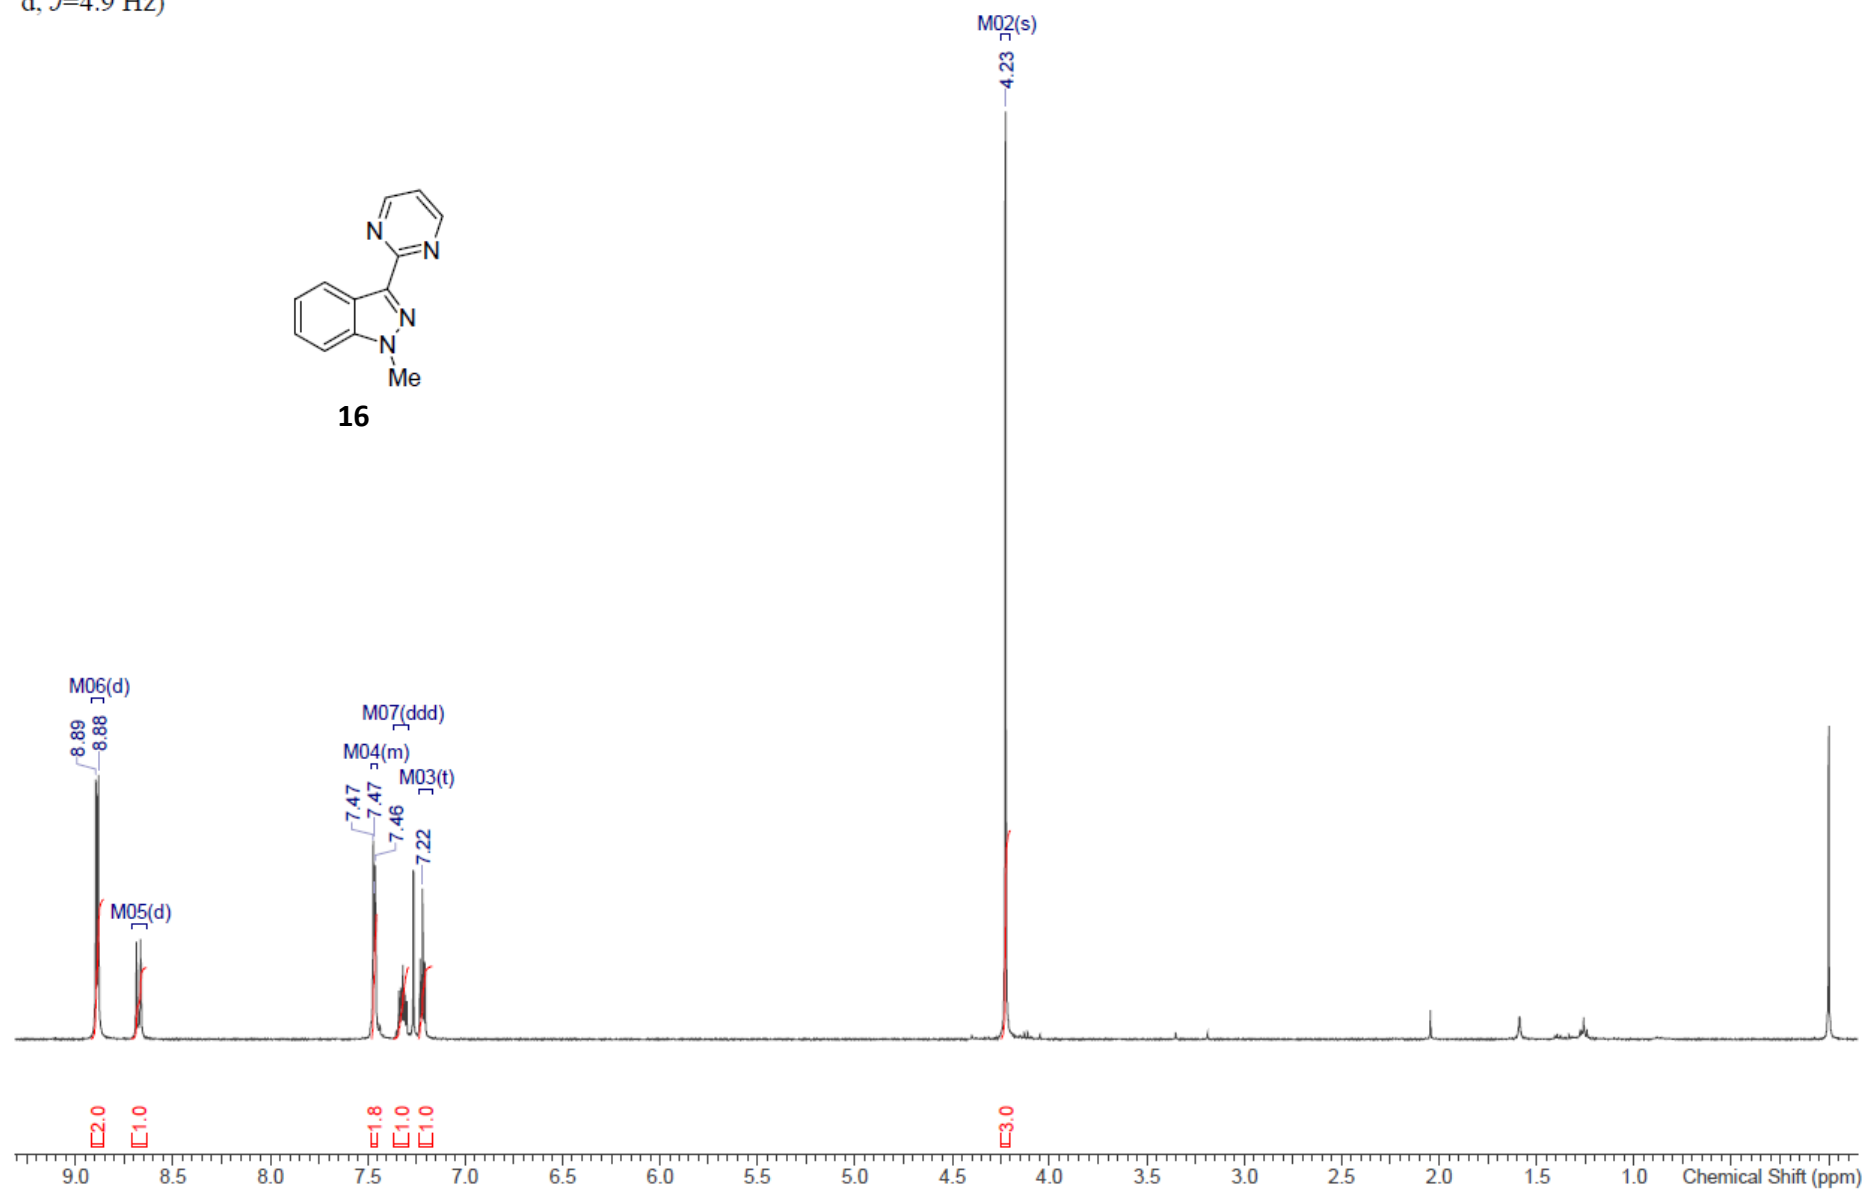

$^{13}\text{C}$  NMR (100 MHz,  $\text{CDCl}_3$ )

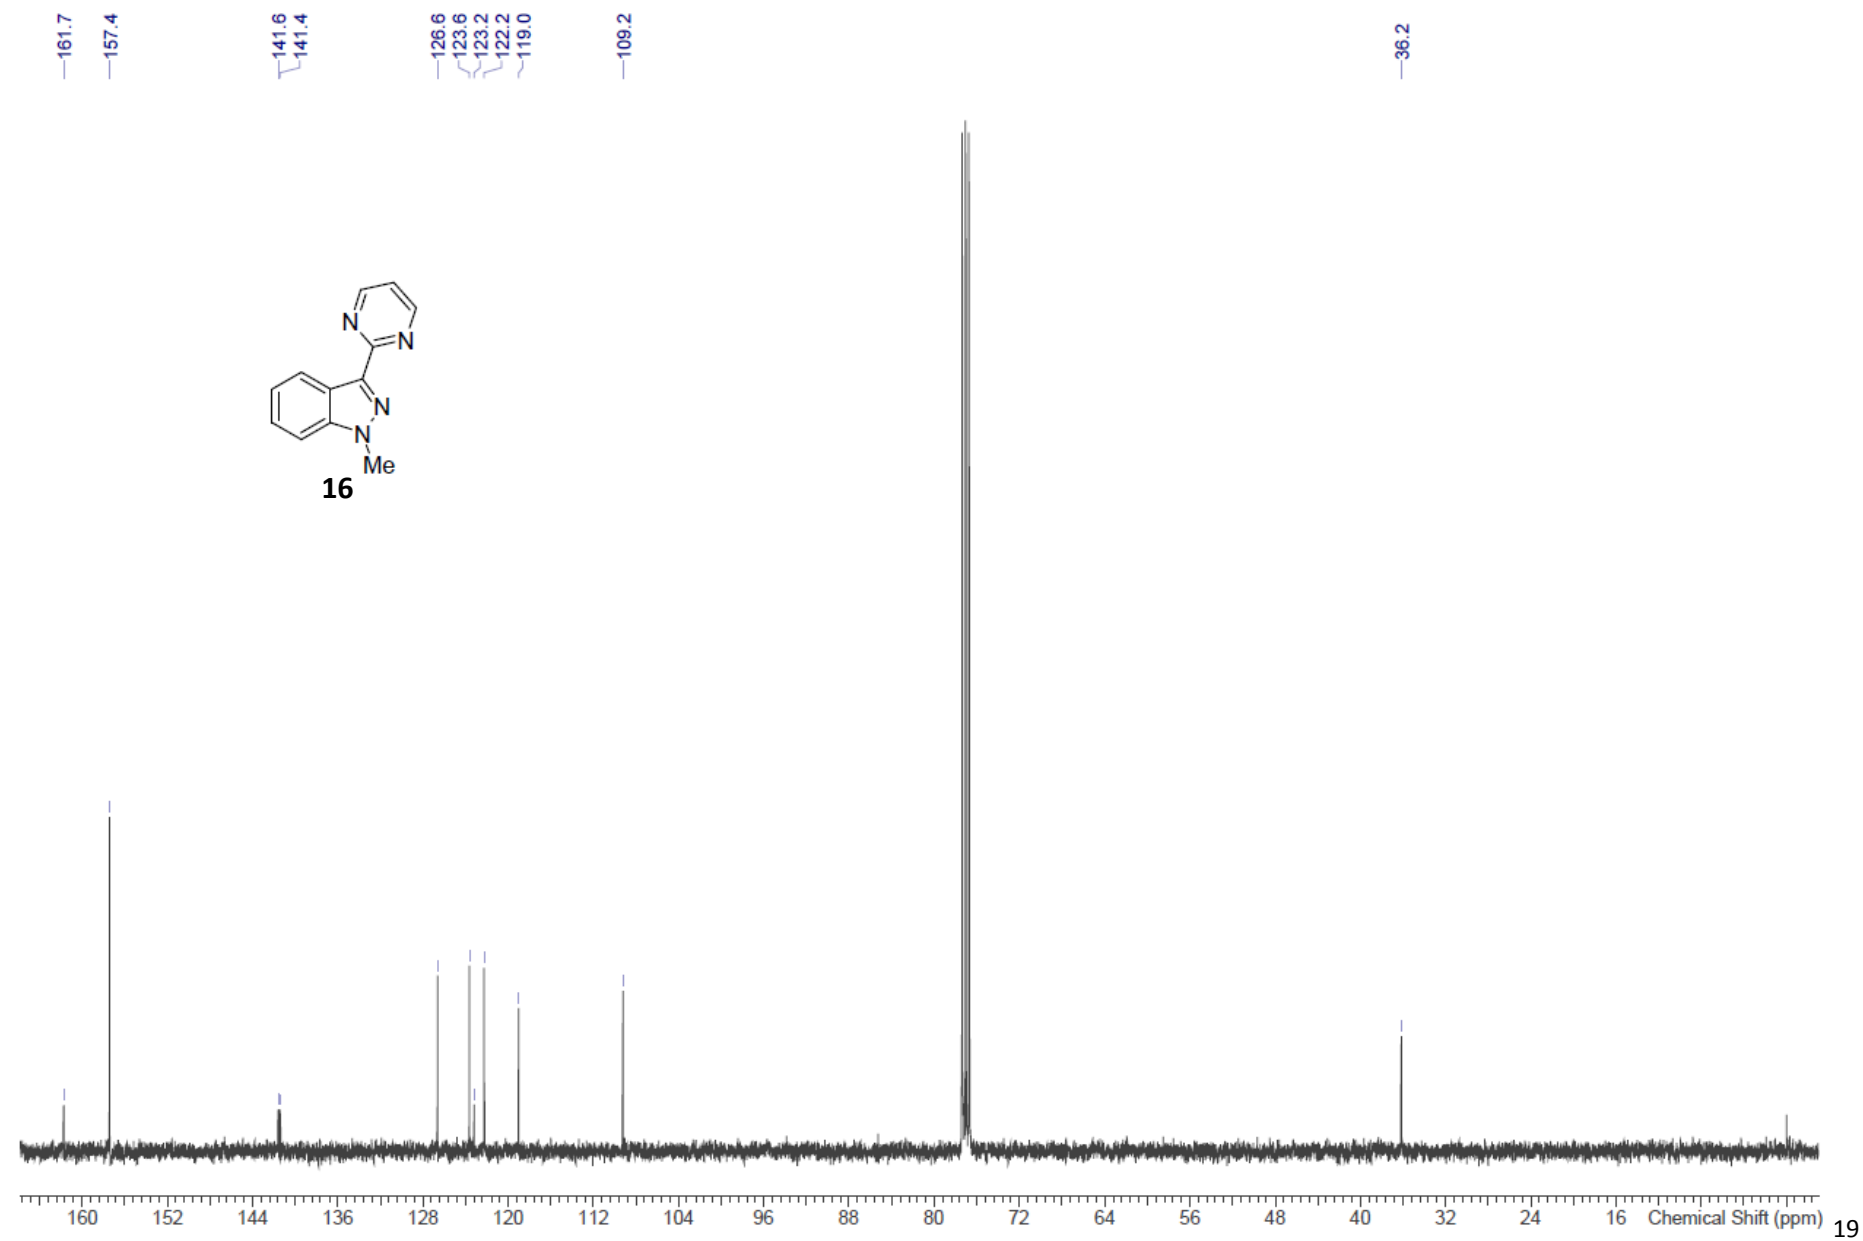

$^1\text{H}$  NMR (400 MHz,  $\text{CDCl}_3$ ): 3.89 (3 H, s) 3.95 (3 H, s) 4.13 (3 H, s) 7.02 - 7.11 (2 H, m) 7.40 (1 H, d,  $J=8.8$  Hz) 7.87 - 7.93 (2 H, m) 8.09 (1 H, dd,  $J=8.8$ , 1.5 Hz) 8.74 (1 H, s).

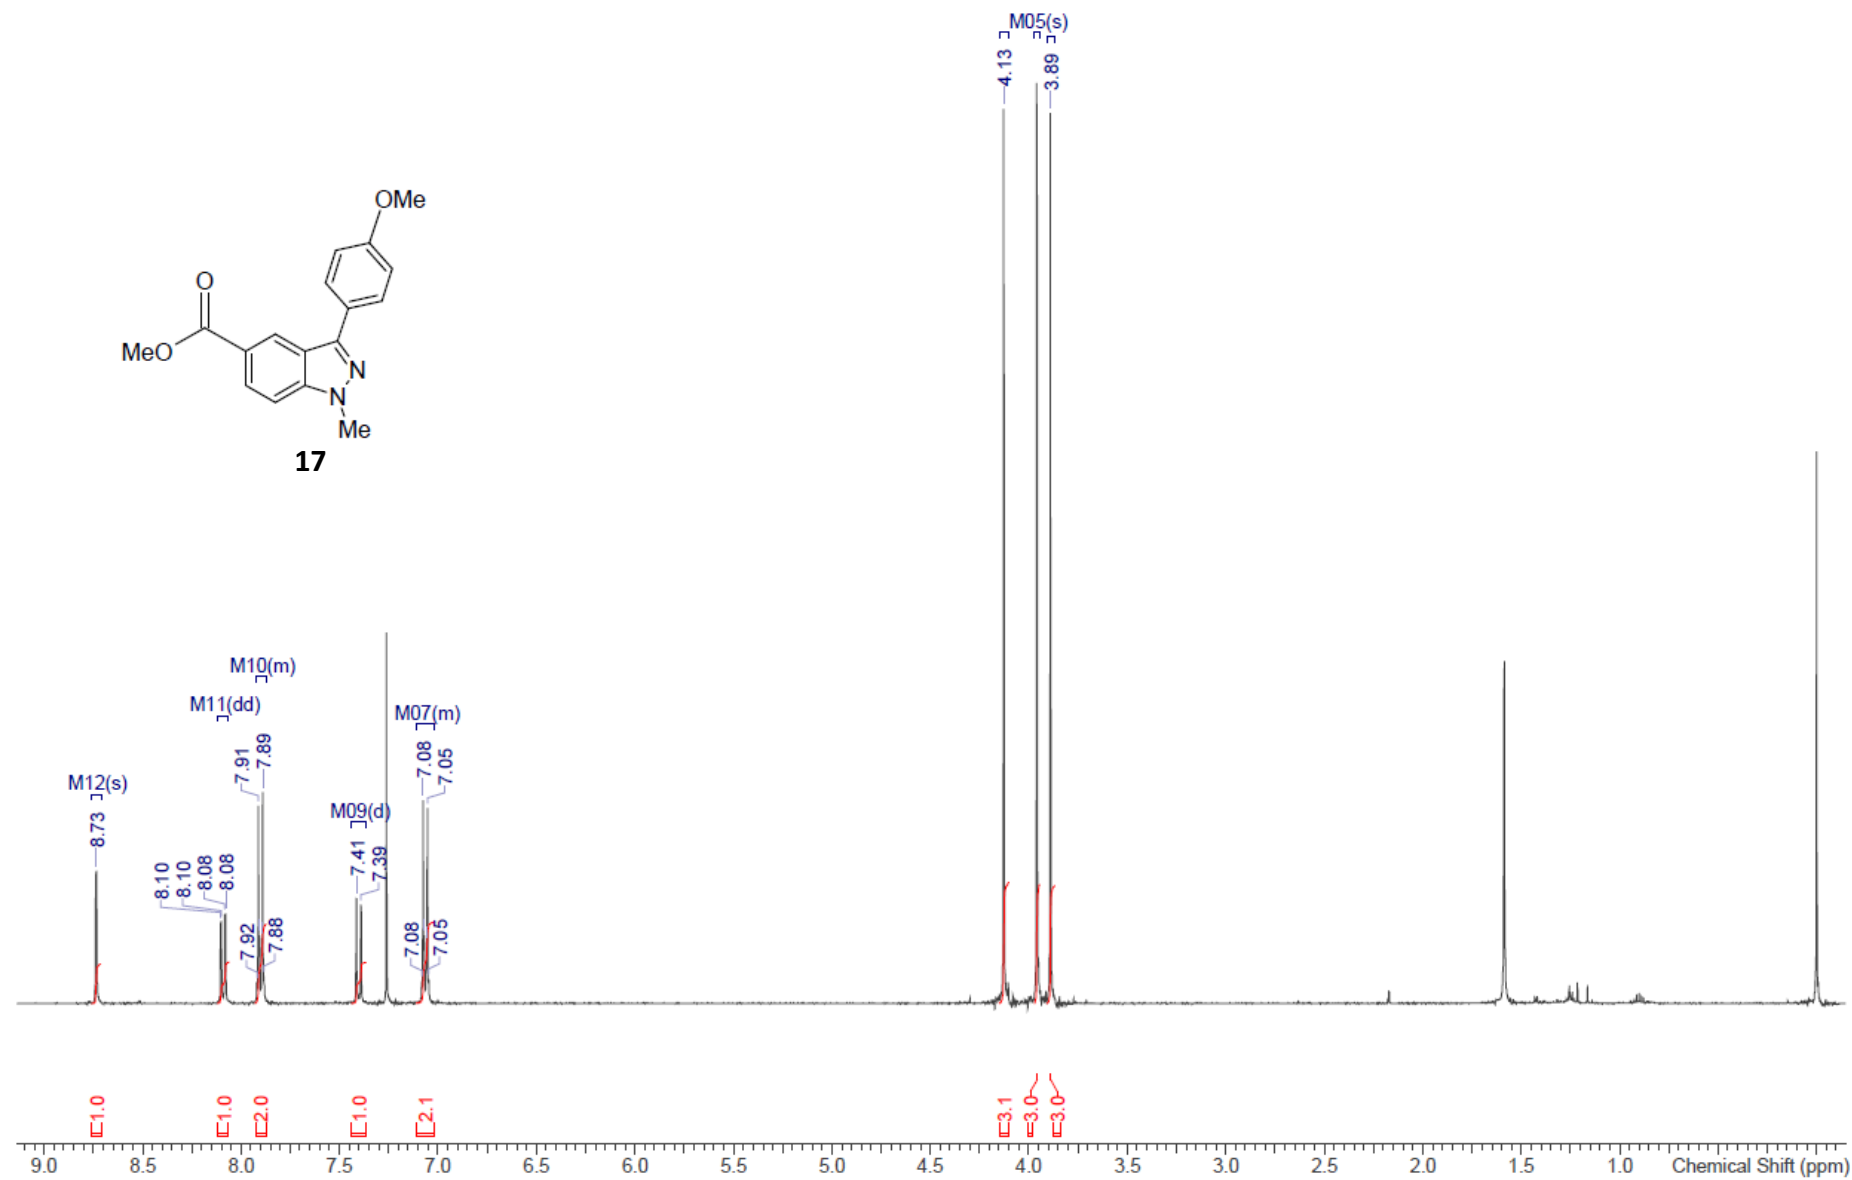

<sup>13</sup>C NMR (100 MHz, CDCl<sub>3</sub>)

—167.4

—159.9

—145.5

—143.1

—128.8

—127.2

—125.5

—125.0

—122.9

—121.3

—114.4

—108.8

—55.4

—52.1

—35.7

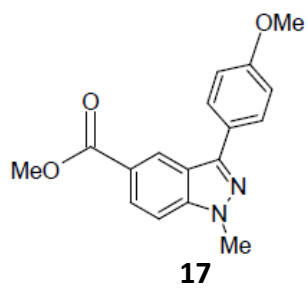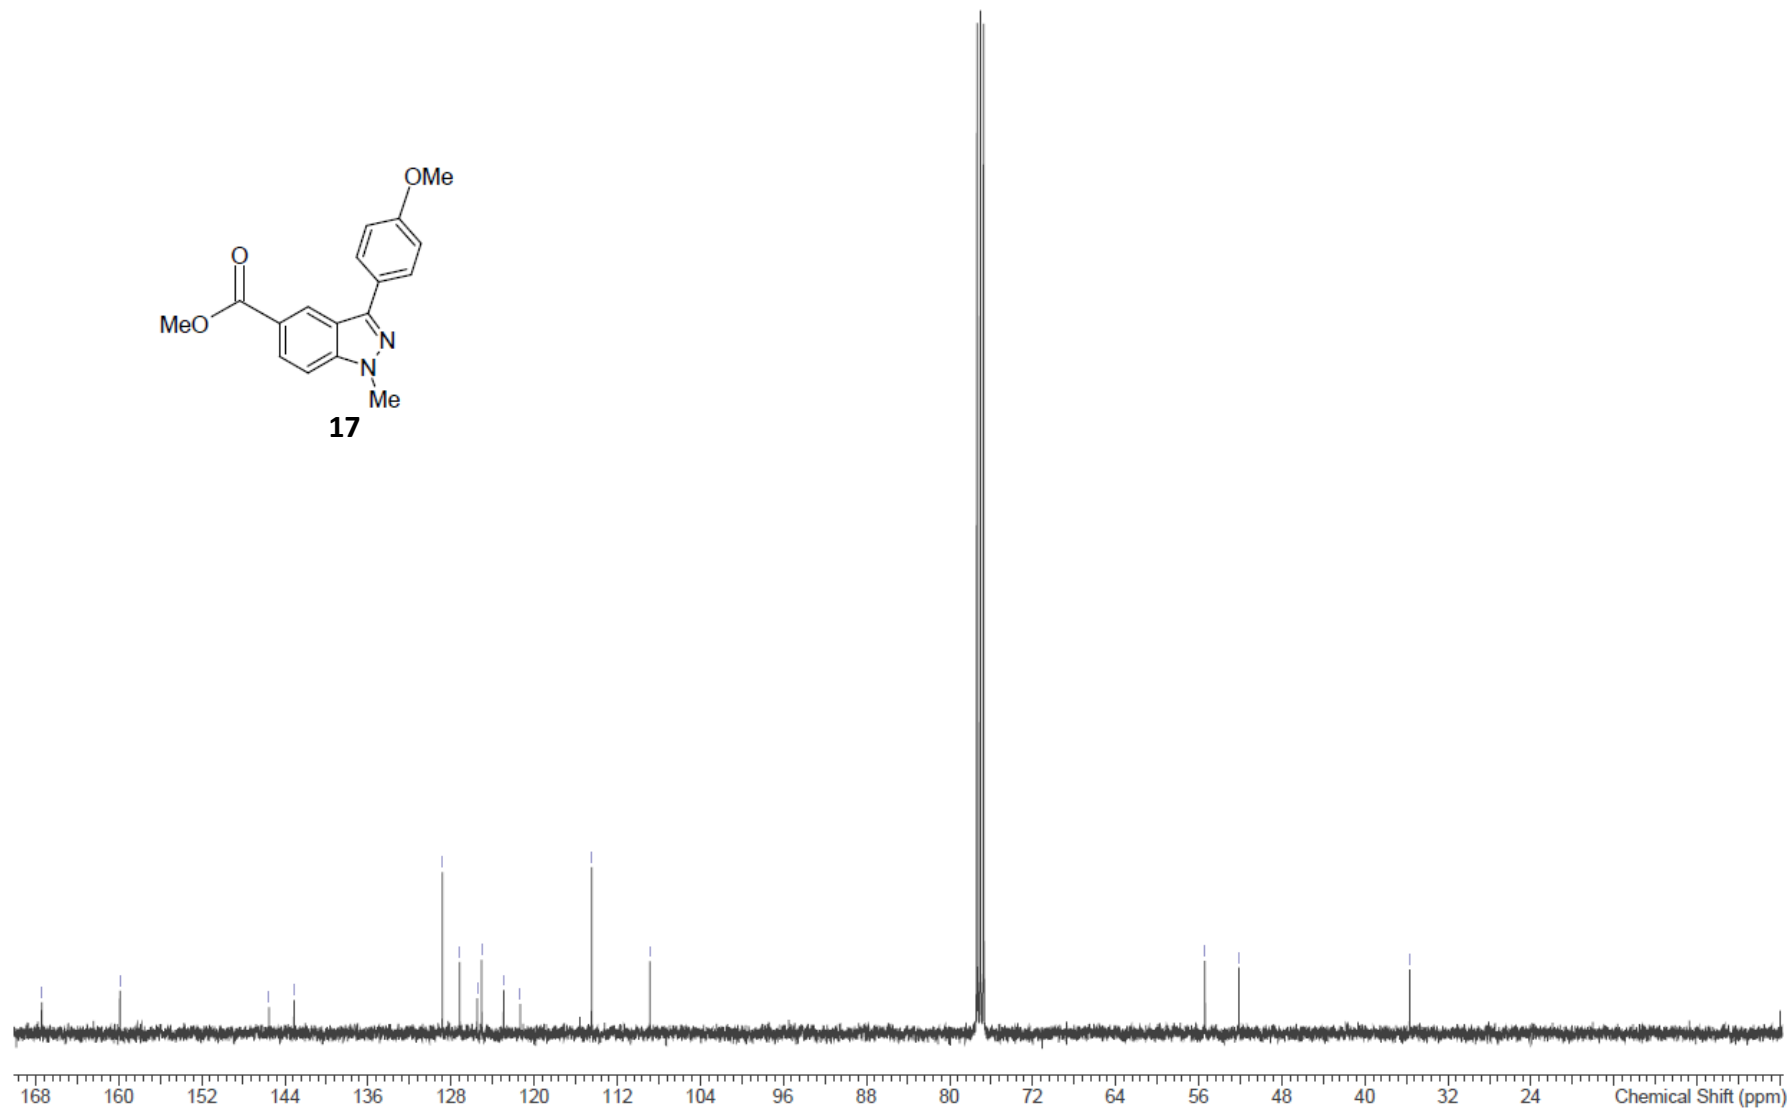

$^1\text{H}$  NMR (500 MHz,  $\text{CDCl}_3$ ): 3.36 (3 H, s) 3.88 (3 H, s), 5.74 (2 H, s) 7.05 (2 H, d,  $J=8.4$  Hz) 7.25 (1 H, t,  $J=7.7$  Hz) 7.44 (1 H, t,  $J=7.6$  Hz) 7.58 (1 H, d,  $J=8.4$  Hz) 7.89 - 7.93 (1 H, m) 7.91 (2 H, d,  $J=8.3$  Hz) 7.99 (1 H, d,  $J=8.1$  Hz).

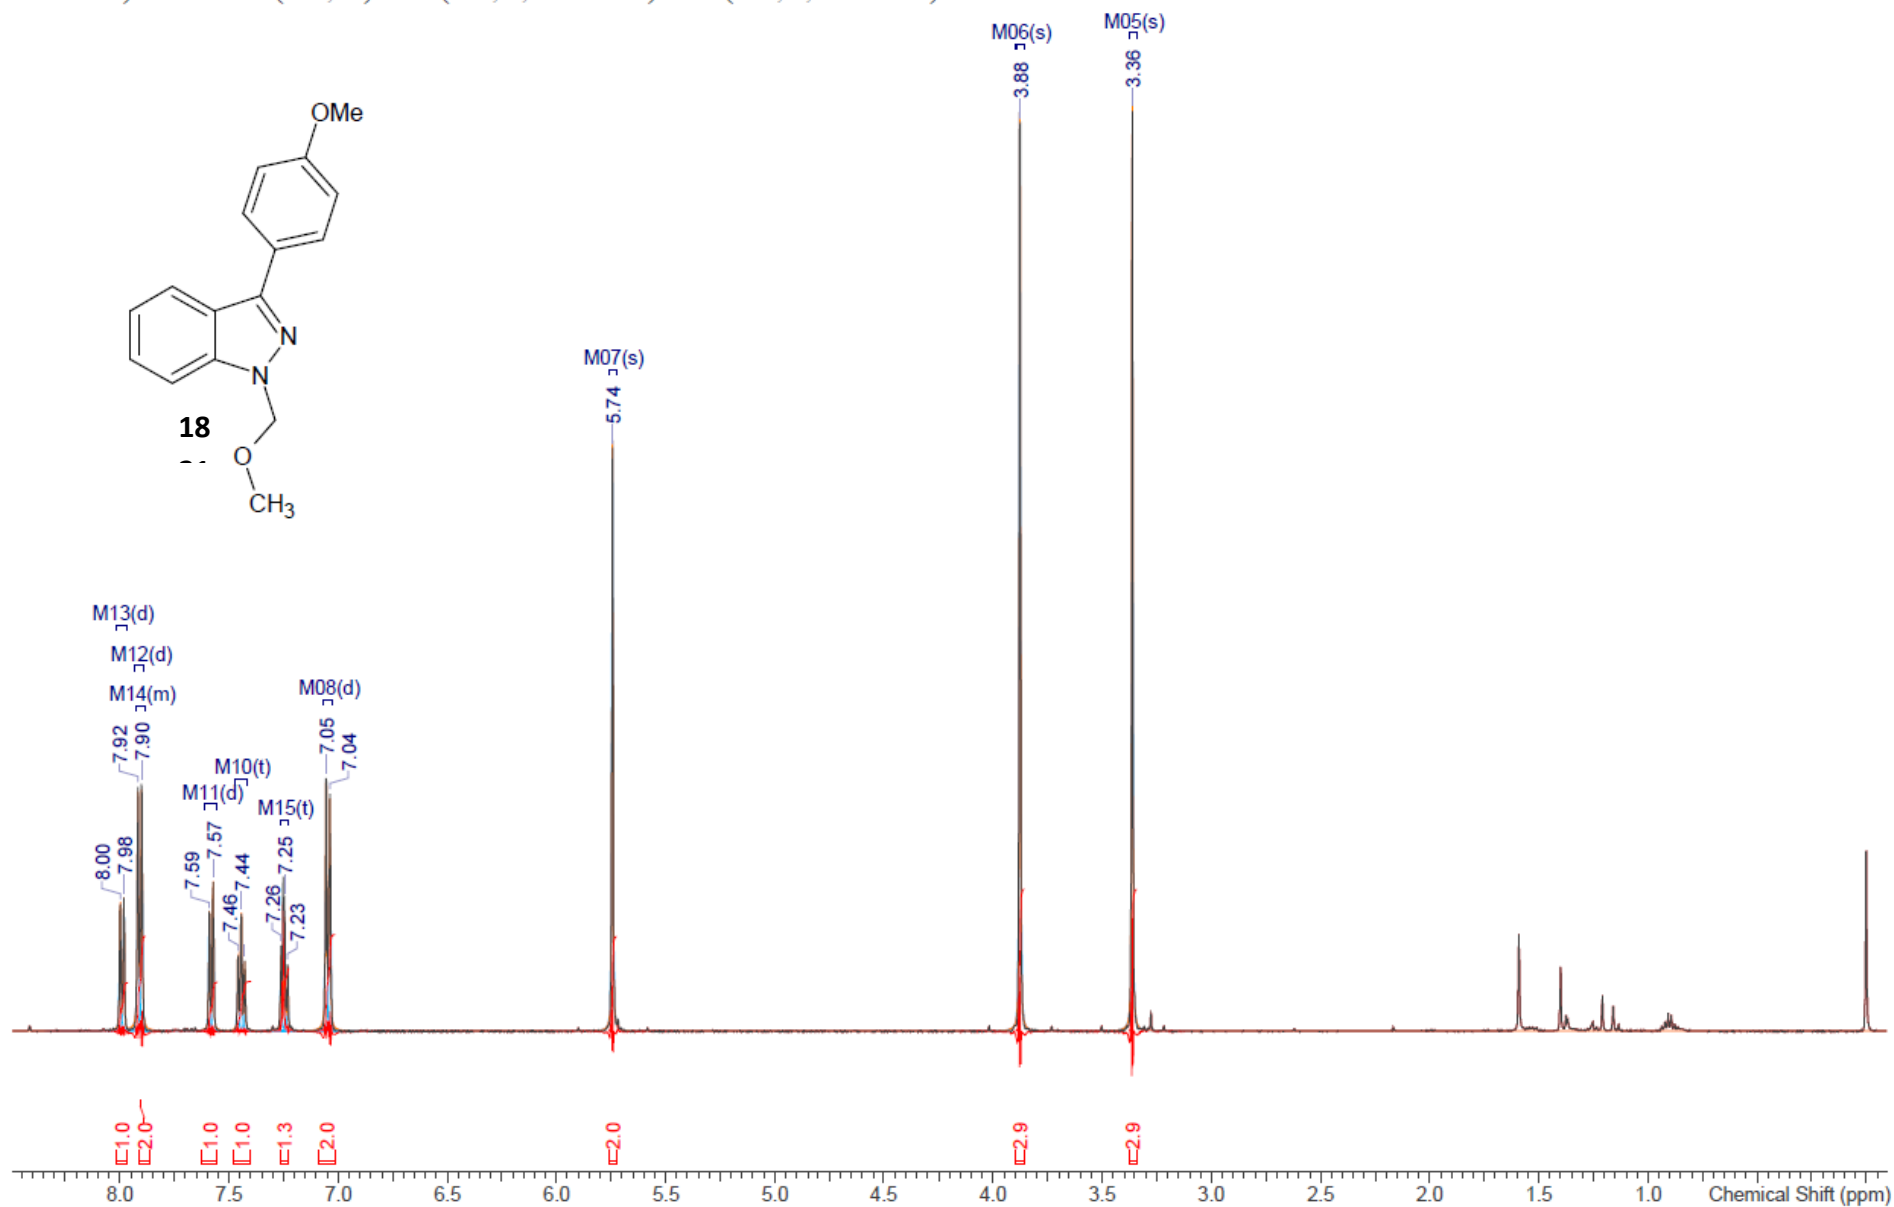

$^{13}\text{C}$  NMR (100 MHz,  $\text{CDCl}_3$ )  $\delta$  ppm 55.4, 56.6, 79.4, 109.8, 114.3, 121.5, 121.6, 122.6, 125.9, 126.8, 128.9, 141.3, 145.0, 159.7.

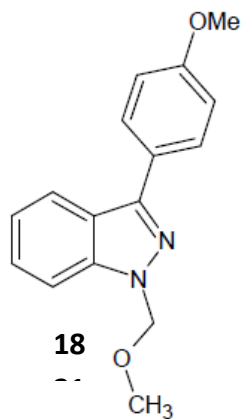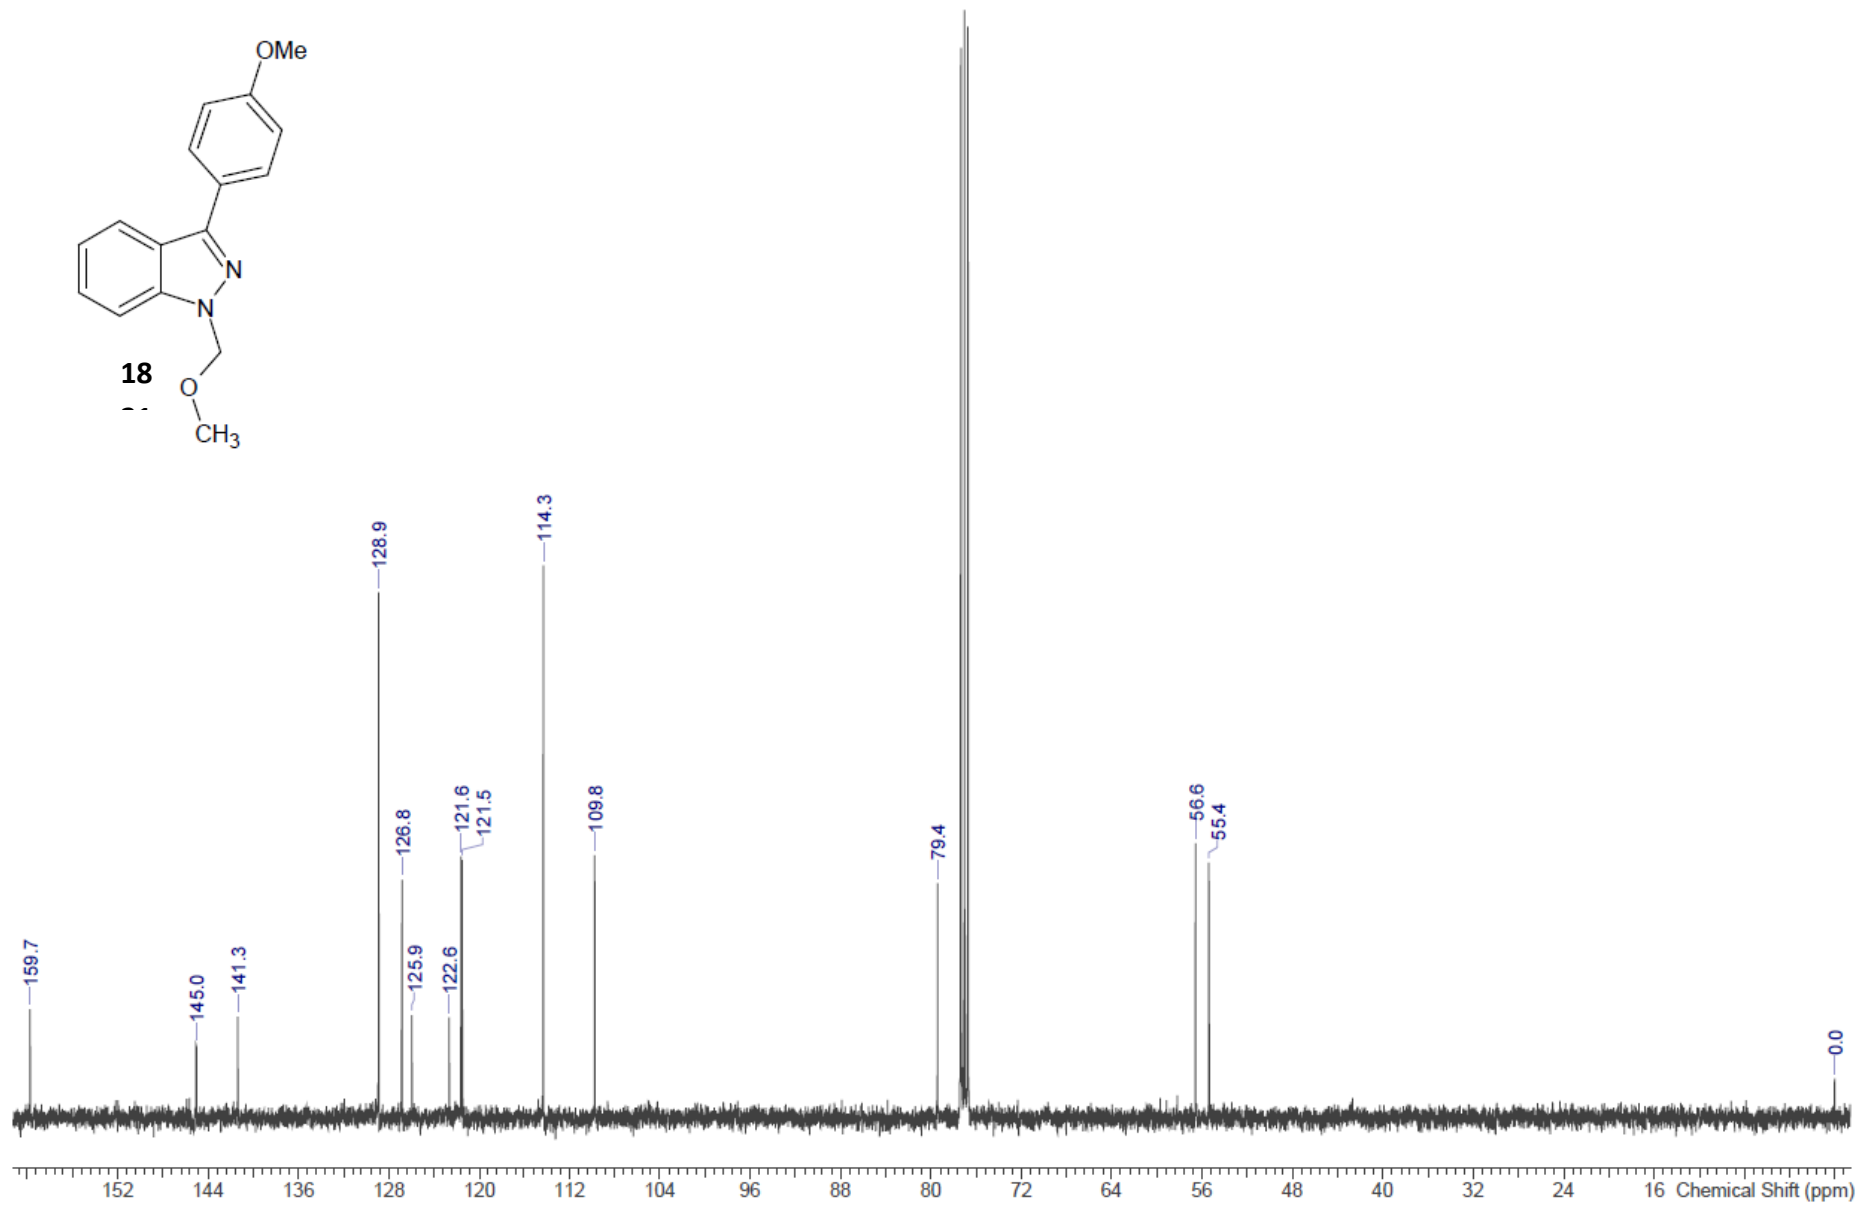

$^1\text{H}$  NMR (500 MHz,  $\text{CDCl}_3$ ): 3.38 (3 H, s) 3.96 (3 H, s) 5.78 (2 H, s) 7.28 - 7.33 (1 H, m) 7.46 - 7.51 (1 H, m) 7.63 (1 H, d,  $J=8.5$  Hz) 8.05 (1 H, d,  $J=8.2$  Hz) 8.07 - 8.10 (2 H, m) 8.17 - 8.20 (2 H, m).

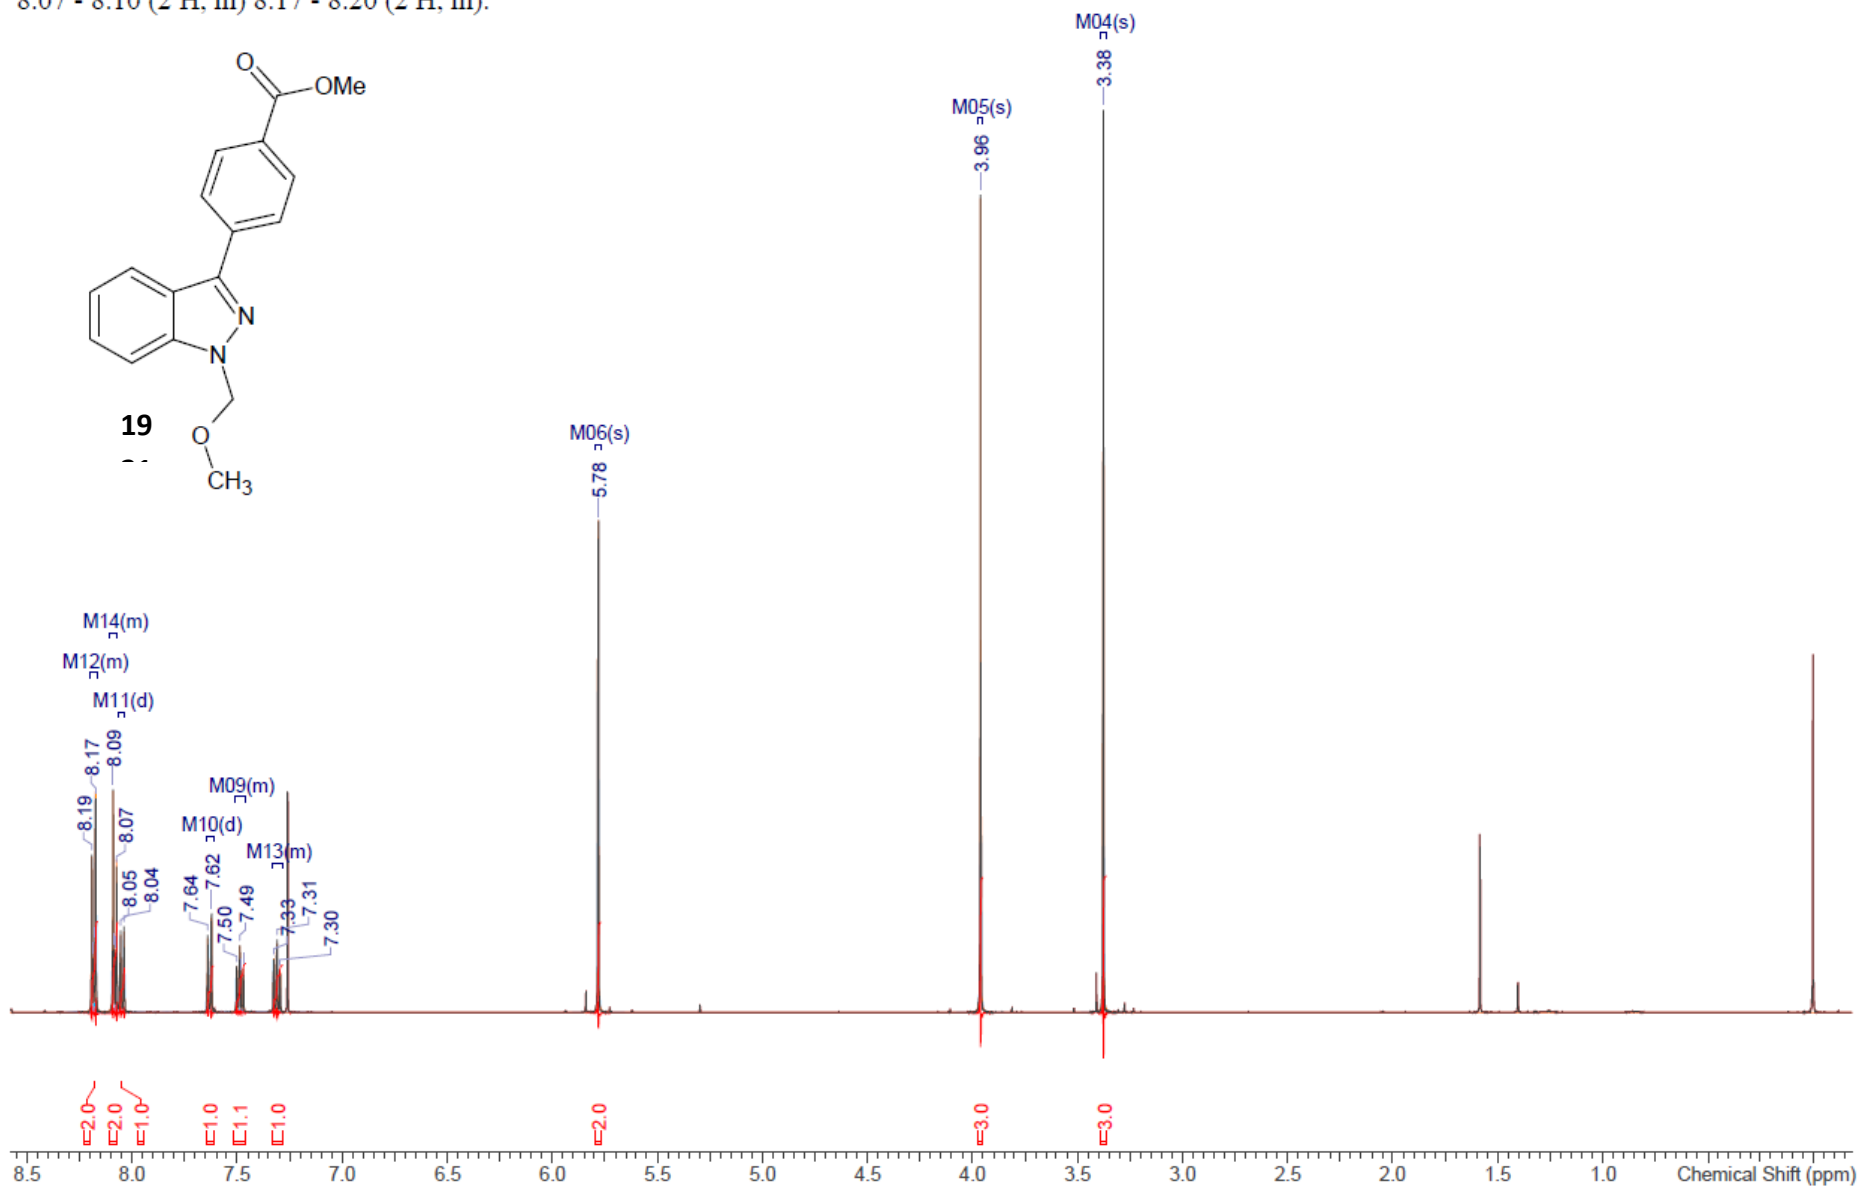



$^{13}\text{C}$  NMR (101 MHz,  $\text{CDCl}_3$ )  $\delta$  ppm 52.2, 56.7, 79.7, 110.1, 121.2, 122.3, 122.6, 127.1, 127.3, 129.6, 130.1, 137.8, 141.4, 143.9, 166.9.

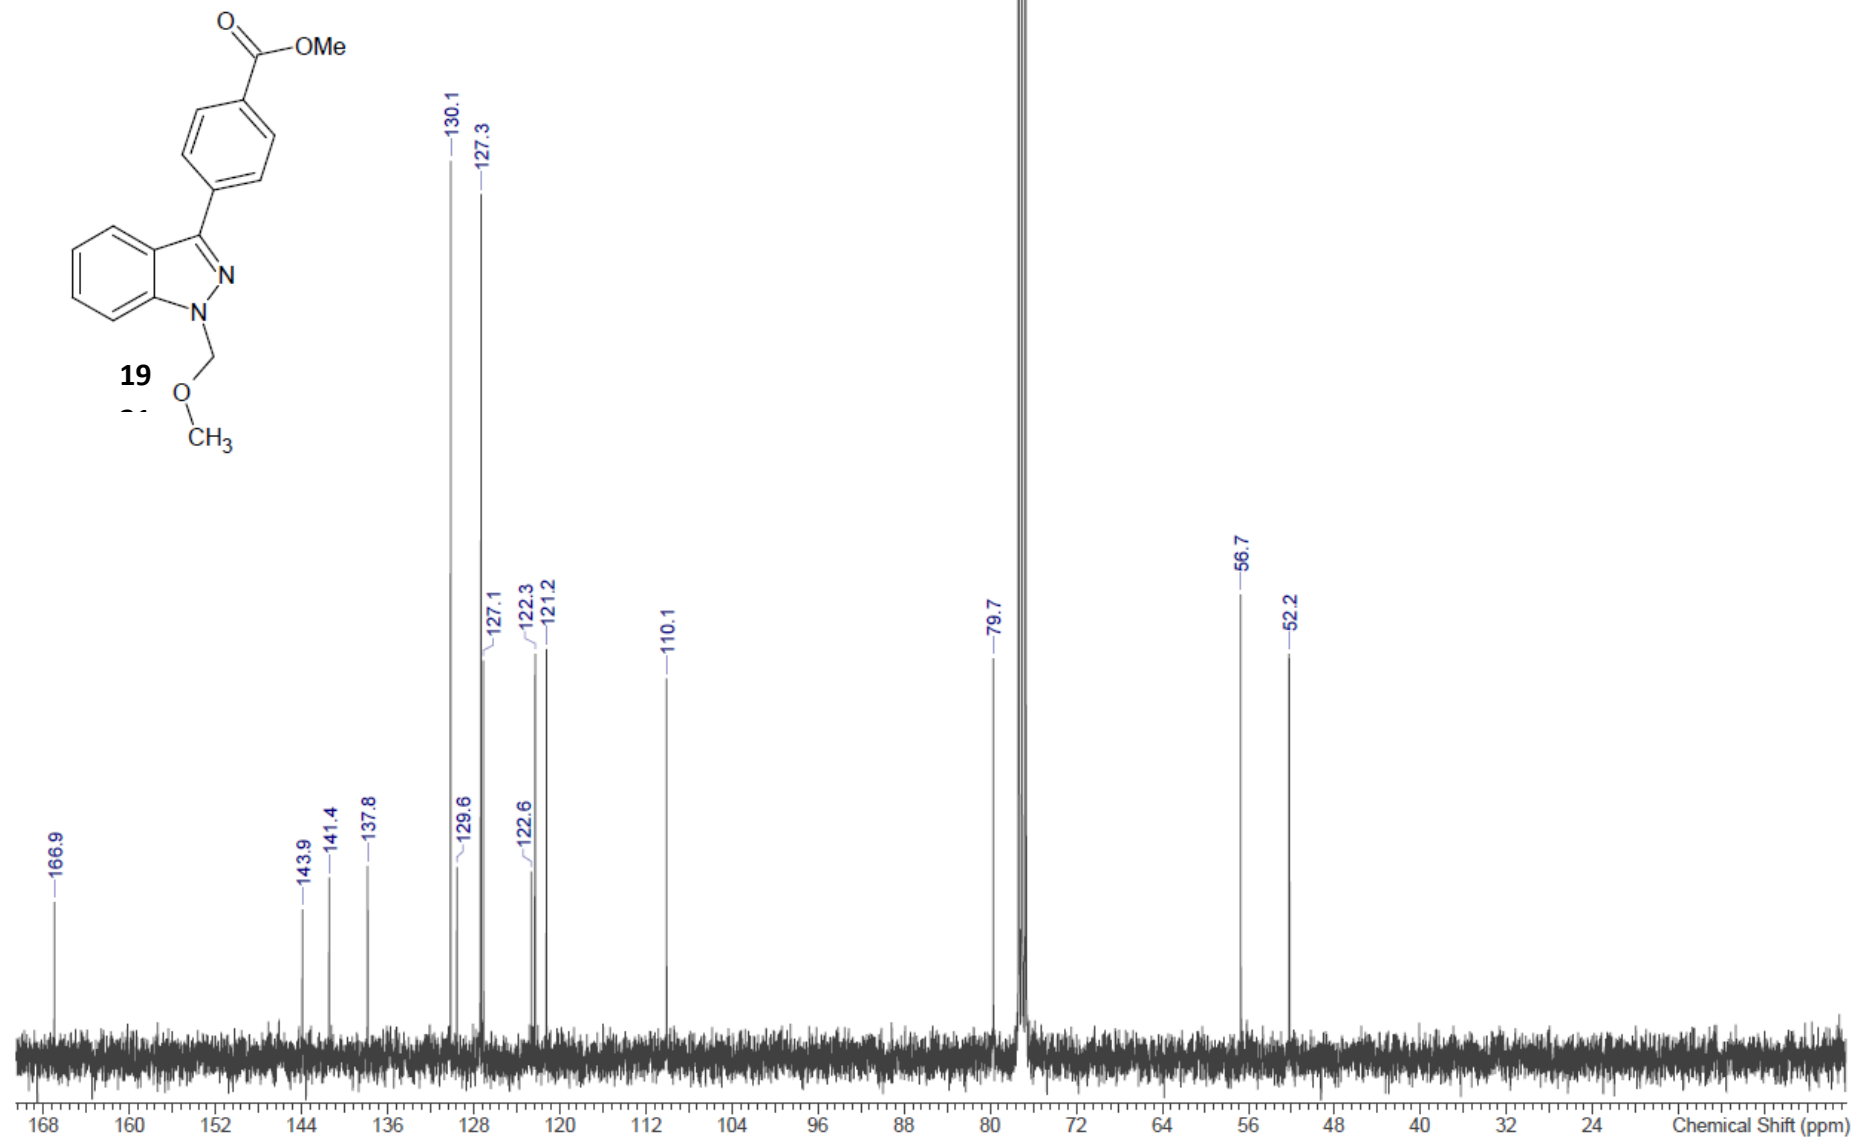



$^1\text{H}$  NMR (400 MHz,  $\text{CDCl}_3$ ): 3.89 (3 H, s) 4.20 (3 H, s) 7.05 (2 H, d,  $J=8.7$  Hz) 7.16 (1 H, dd,  $J=8.1, 4.5$  Hz) 7.89 (2 H, d,  $J=8.7$  Hz) 8.31 (1 H, d,  $J=8.1$  Hz) 8.53 - 8.61 (1 H, m).

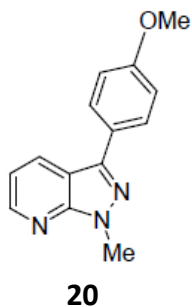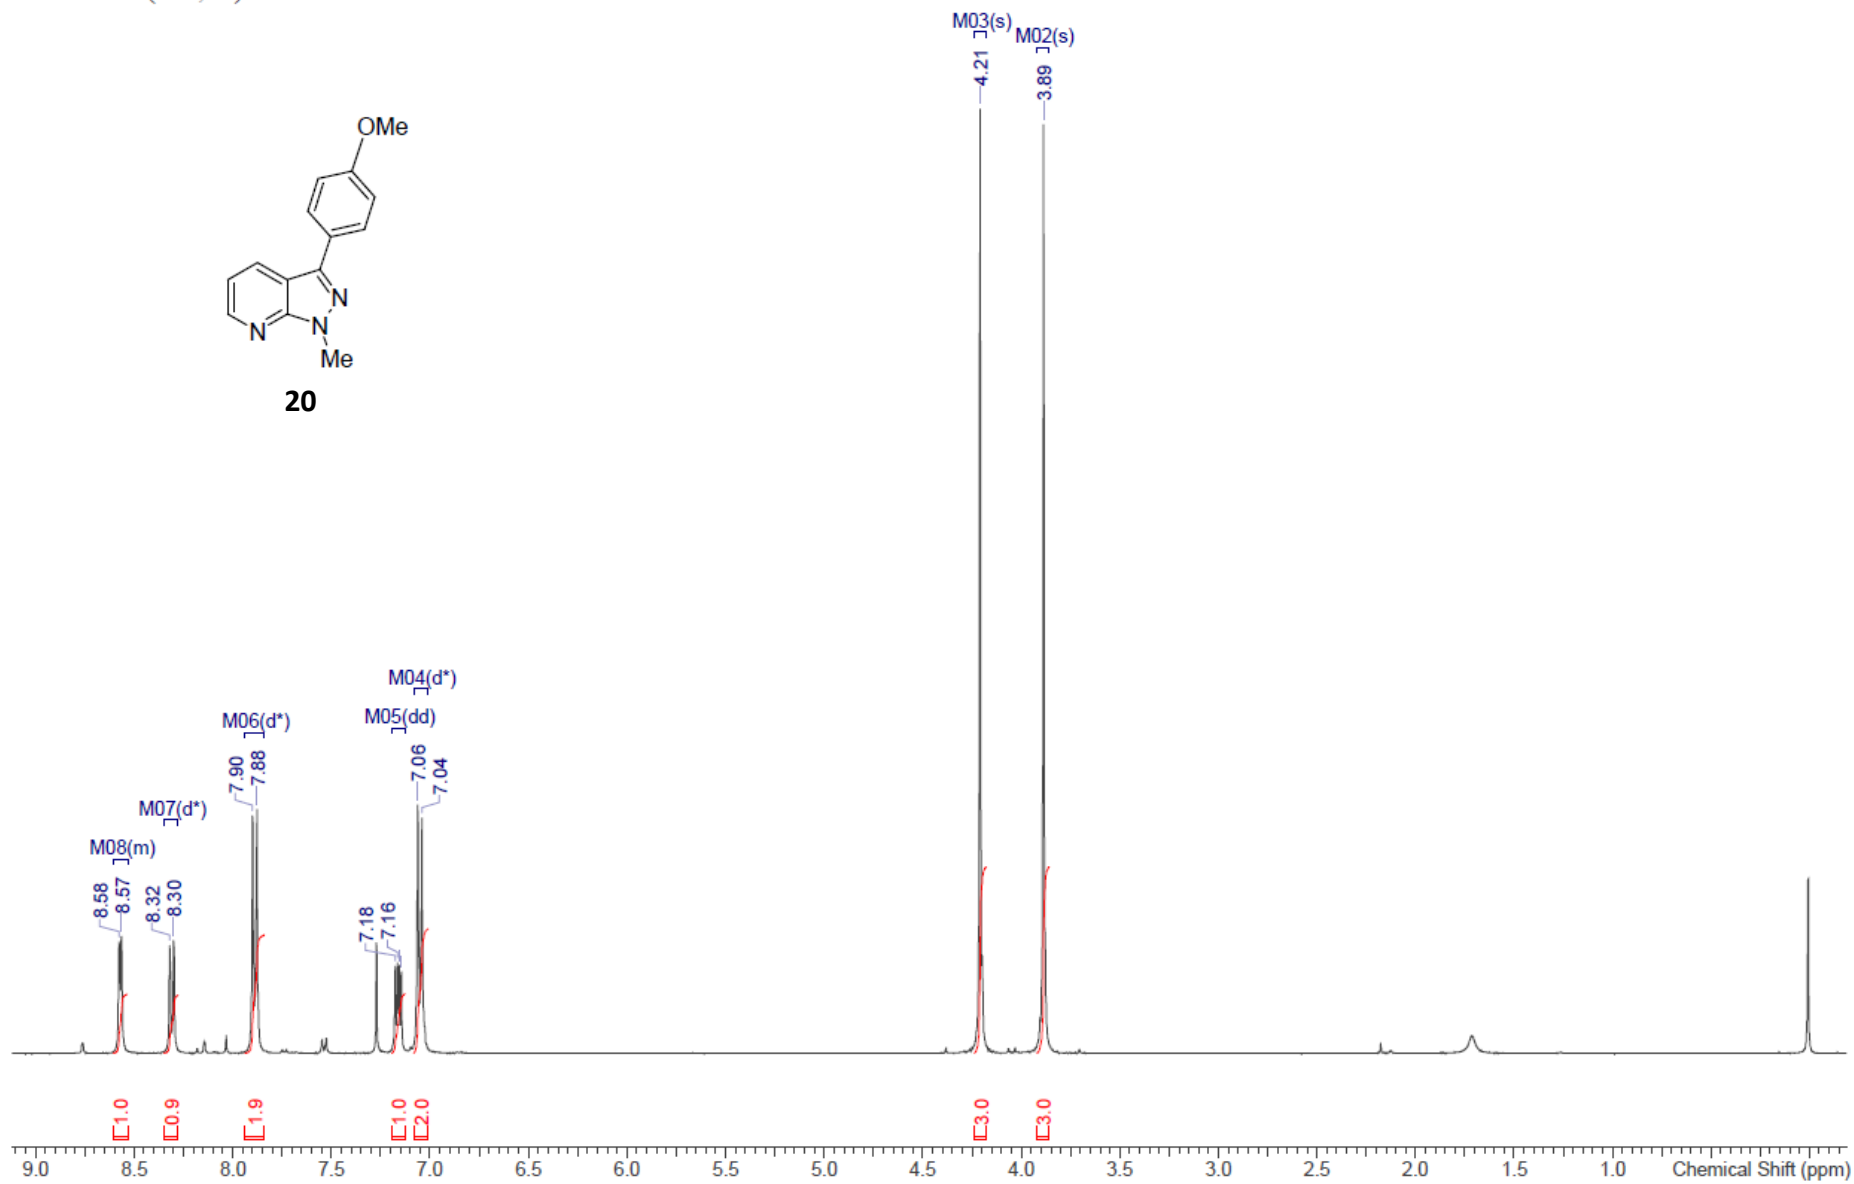

$^{13}\text{C}$  NMR (100 MHz,  $\text{CDCl}_3$ )

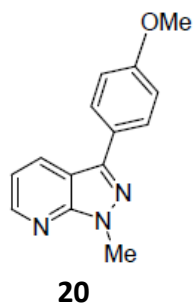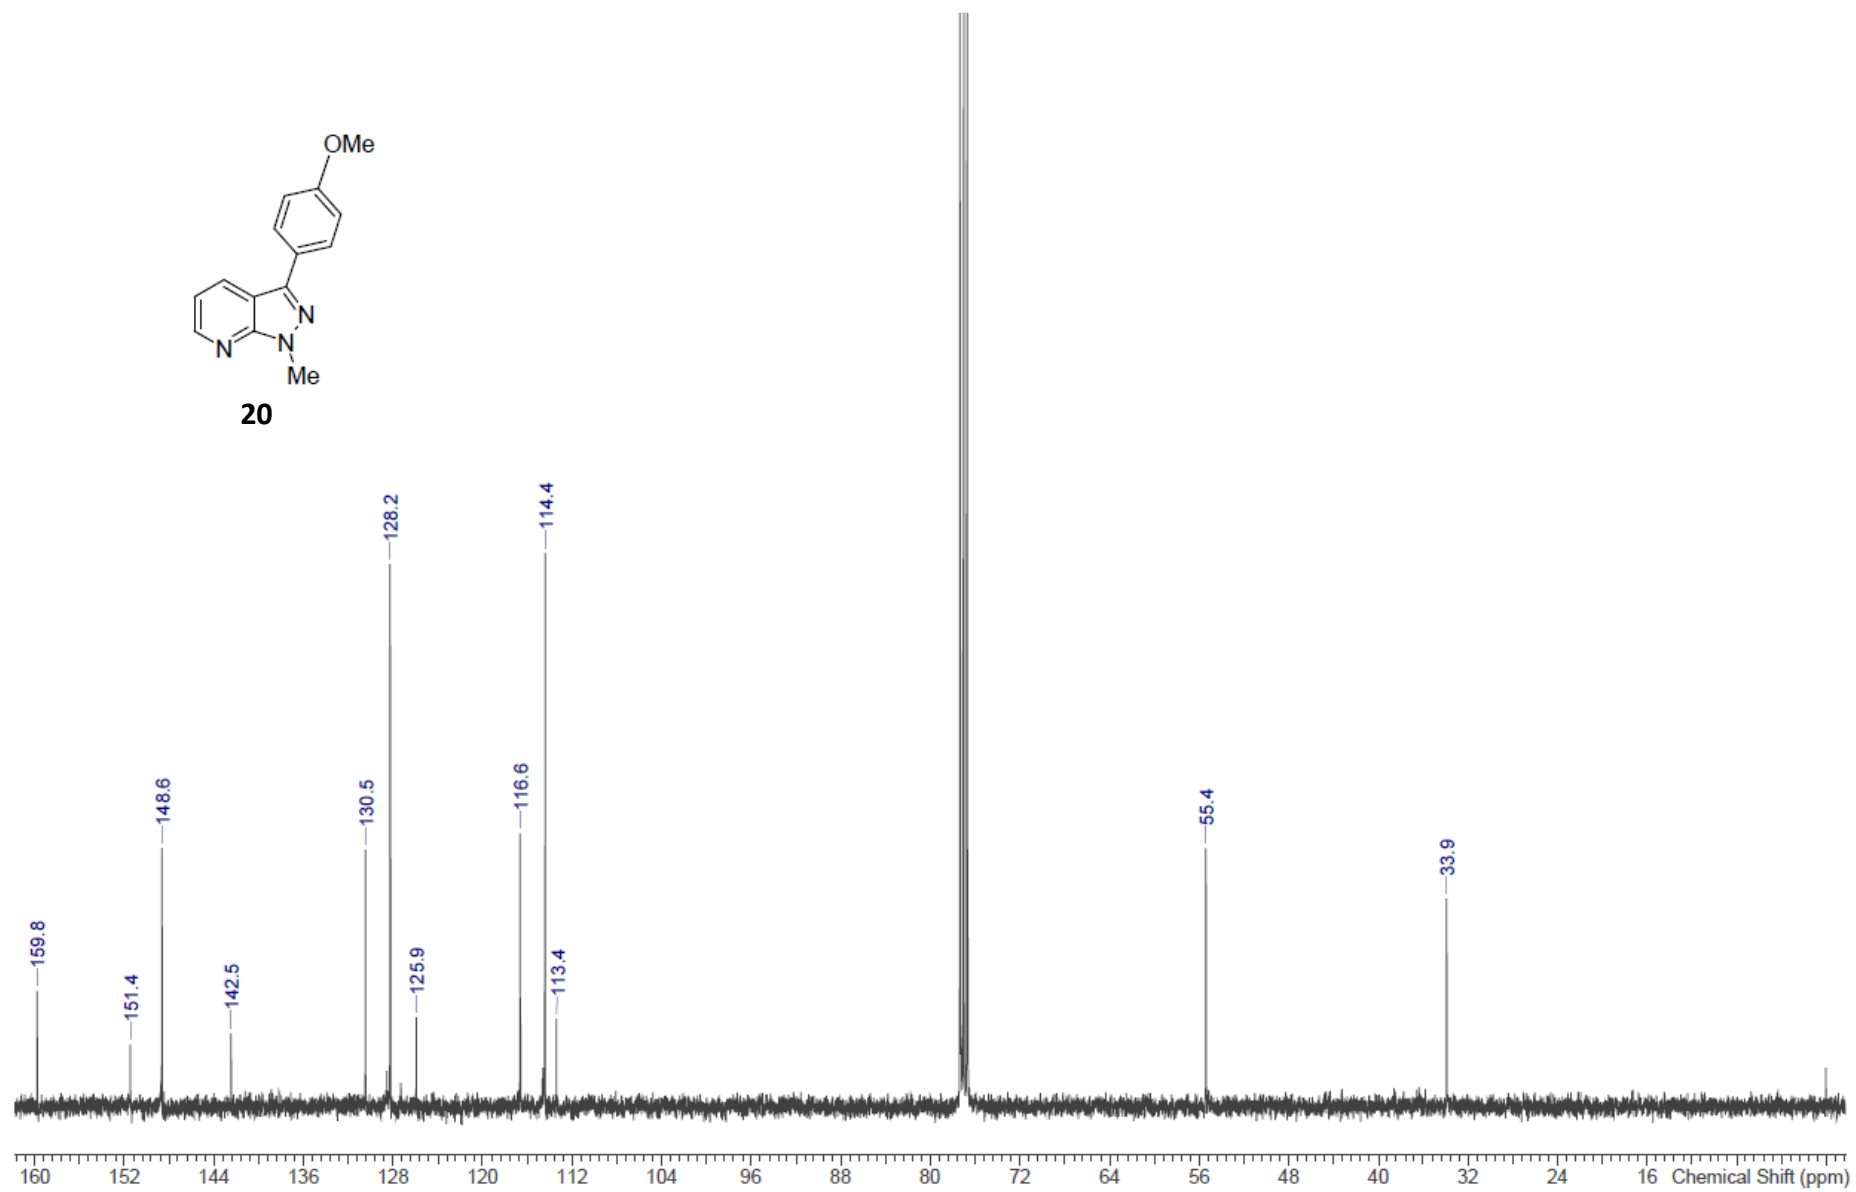

$^1\text{H}$  NMR (400 MHz,  $\text{CDCl}_3$ ): 3.97 (3 H, s) 4.06 (3 H, s) 4.18 (3 H, s) 7.75 - 7.80 (2 H, m) 7.81 (1 H, t,  $J=1.1$  Hz) 8.14 - 8.19 (2 H, m) 8.21 (1 H, d,  $J=1.3$  Hz) 8.49 (1 H, d,  $J=0.9$  Hz).

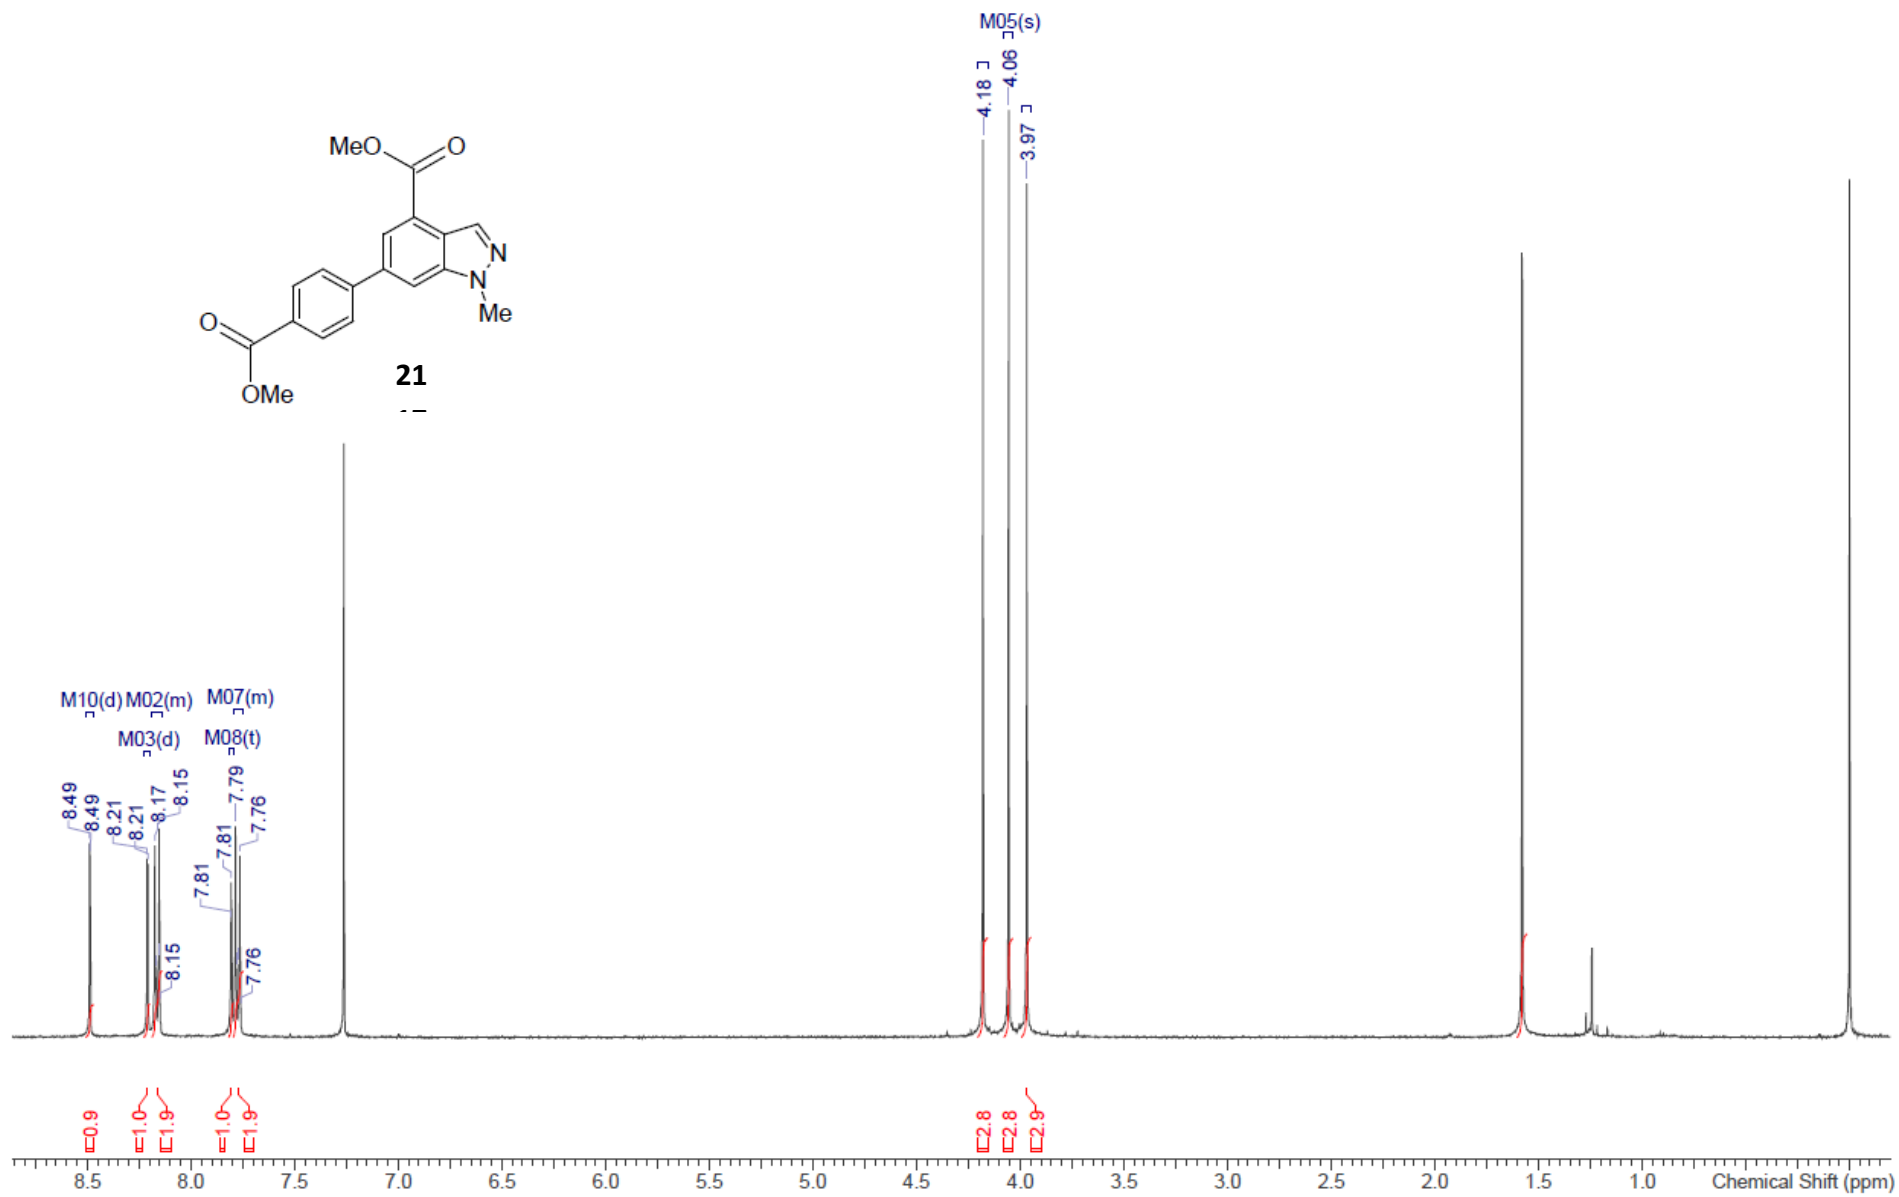

$^{13}\text{C}$  NMR (100 MHz,  $\text{CDCl}_3$ )

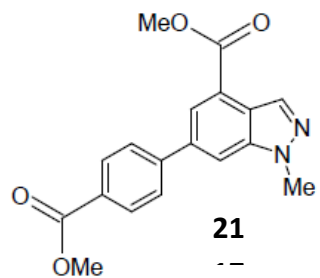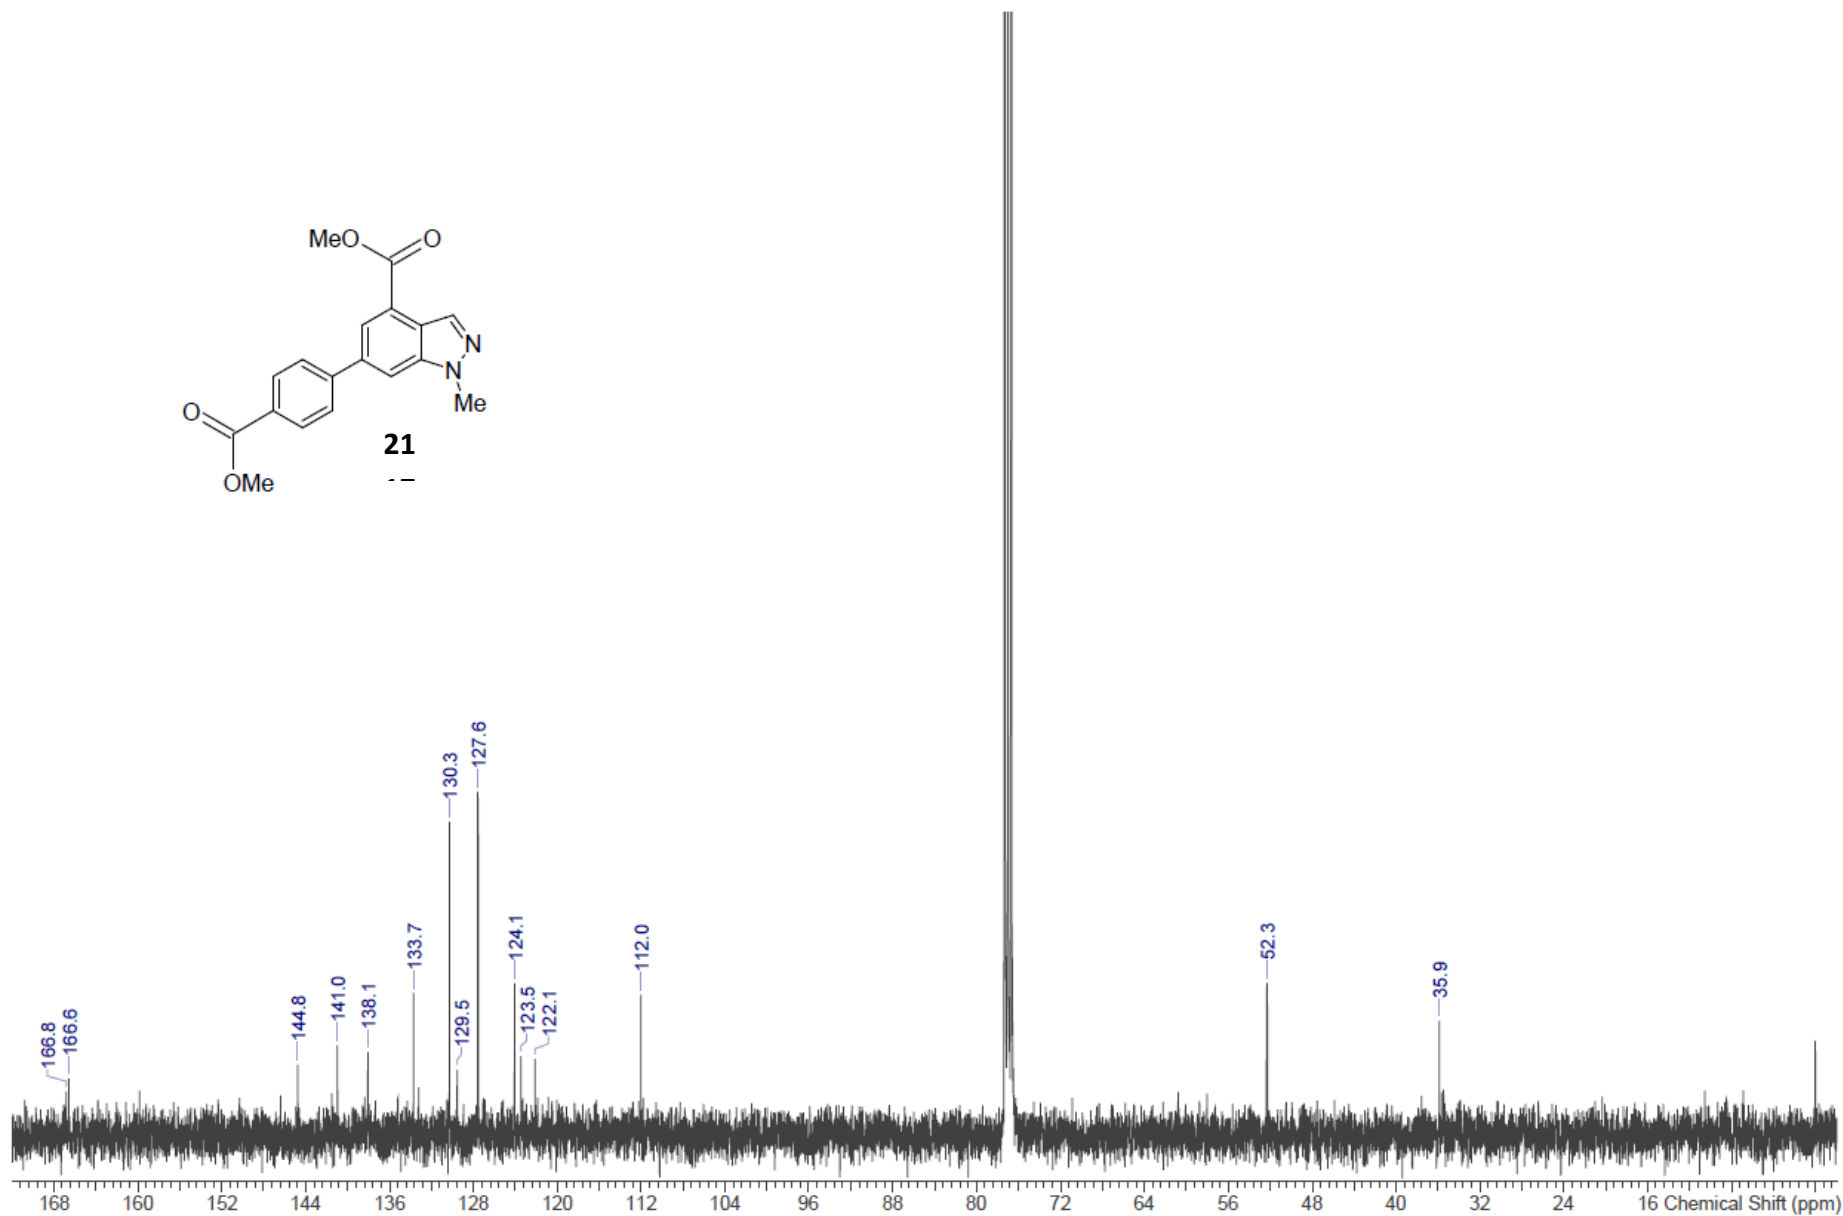

Supplement: c4ra04235b1.pdf [file c4ra04235b1.pdf]
