# Supplementary material for: Synthesis of 3-aryl-1H-indazoles via iridium-catalysed C–H borylation and Suzuki–Miyaura coupling
Source: Royal Society of Chemistry journal article supplement (doi:10.1039/c4ra04235b), 2014-01-01
Supplement: c4ra04235b2.pdf [file c4ra04235b2.pdf]

## Synthesis of 3-aryl-1*H*-indazoles via iridium-catalysed C-H borylation and Suzuki-Miyaura coupling

Ben. A. Egan and Paul M. Burton

*Syngenta Ltd., Jealott's Hill International Research Centre, Bracknell,  
Berkshire RG42 6EY, U.K.*

Paul.Burton@Syngenta.com

### *Reagents*

The following reagents were obtained from commercial suppliers: XPHOS-2nd Generation Precatalyst (XPHOS-Pd-G2) and [Ir(OMe)COD]<sub>2</sub> (Strem), di-*tert*-butyl bipyridine (dtbpy), *tert*-butyl methyl ether (TBME) and potassium phosphate (Sigma Aldrich), bis(pinacolato)diboron (B<sub>2</sub>Pin<sub>2</sub>) (Alfa Aesar). All reagents were used without purification.

### *Starting Materials*

All aryl halides were purchased from commercial suppliers and used without further purification. The following indazoles were obtained from commercial suppliers: 1-methyl-1*H*-indazole (Combi-Blocks), methyl 1-methyl-1*H*-indazole-4-carboxylate (Apollo Scientific) and methyl 1-methyl-1*H*-indazole-5-carboxylate (Apollo Scientific). Other indazoles were synthesised using modified procedures from the literature: 1-methylpyrazolo[3,4-*b*]pyridine<sup>1</sup> and 1-(methoxymethyl)indazole<sup>2</sup>.

---

1. Lynch, B. M.; Khan, M. A.; Teo, H. C.; Pedrotti, F. *Can. J. Chem.*, 1988, 66, 420-428.

2. Unsinn, A.; Knochel, P. *Chem. Commun.* 2012, 48, 2680-2682.

## General Procedure 1: Indazole Borylation

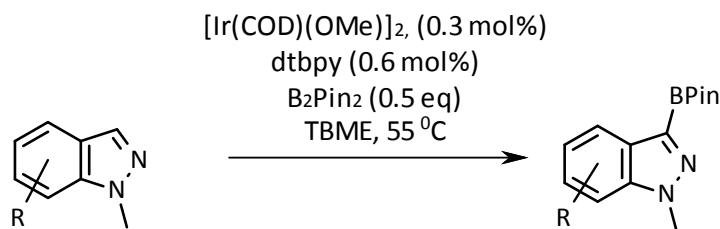

A round-bottomed flask equipped with reflux condenser was charged with indazole (1.0 Eq.),  $\text{B}_2\text{Pin}_2$  (0.505 Eq.), dtbpy (0.006 Eq.) and  $[\text{Ir}(\text{OMe})\text{COD}]_2$  (0.003 Eq.) in TBME (typically 0.2 M) and the resultant solution was heated at reflux ( $55^\circ\text{C}$ ) under an atmosphere of  $\text{N}_2$ . The reaction monitored by GC-MS analysis until completion (typical reaction times of 0.5-4 h, with a reaction conversion of approx. 70-95%). The reaction was cooled to RT before being quenched with water and extracted with DCM. The combined organics were collected, dried and concentrated *in vacuo*. Purification via flash column chromatography afforded the product. This could be further purified (to remove any pinacol/boronate residues) by recrystallization from hexane or trituration from hexane at  $5^\circ\text{C}$ . The pinacolato-boronate products were typically obtained as colourless crystalline solids, stable at RT, however they were kept in the freezer for long-term storage.

## General Procedure 2: Thermal Suzuki

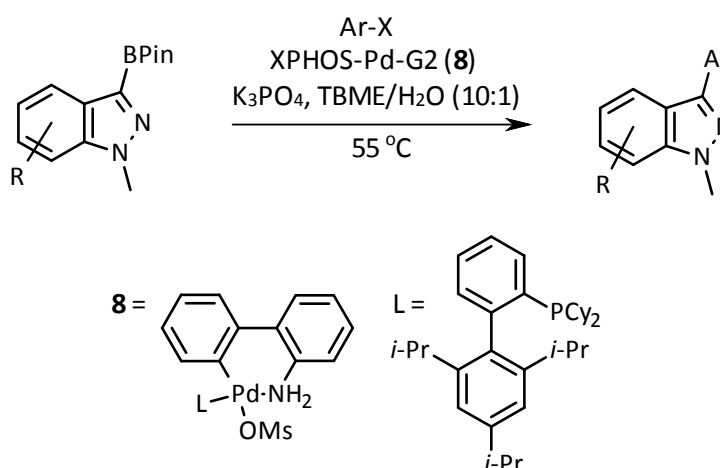

A round-bottomed flask equipped with reflux condenser was charged with boryl-indazole (1.1-1.5 Eq.), tripotassium phosphate (2.1 Eq.), XPHOS-Pd-G2(0.02 Eq.) and aryl halide (1.0 Eq.) in TBME and water (typically in a 10:1 ratio at 0.1 M). The reaction mixture was heated at reflux ( $55^\circ\text{C}$ ) under  $\text{N}_2$  for 0-24 h (typically 16 h). The reaction was monitored by a combination of TLC, GC-MS

and LC-MS analysis. After cooling to RT, reactions were quenched with water and extracted with organic solvent (typically DCM or EtOAc), washed with sat'd brine solution, dried and concentrated *in vacuo*. Purification by flash column chromatography afforded the product.

### General Procedure 3: Microwave Assisted Suzuki

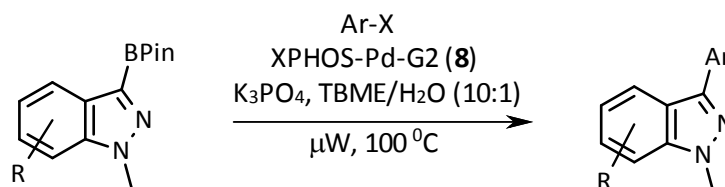

The reaction was performed under analogous conditions to General Procedure 2, except the reaction was heated in a microwave reactor at 100 °C for 20 min. The reaction was monitored by a combination of TLC, GC-MS and LC-MS analysis. After cooling to RT, reactions were diluted with water and extracted with organic solvent (typically DCM or EtOAc), washed with sat'd brine solution, dried and concentrated *in vacuo*. Purification by flash column chromatography afforded the product.

### General Procedure 4: One-Pot Thermal Borylation Suzuki

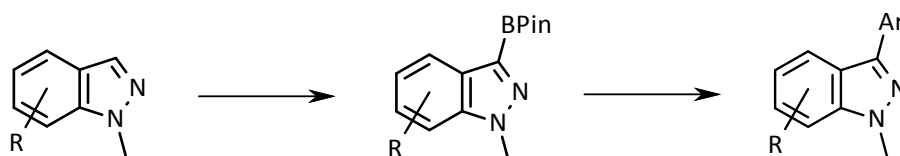

A round-bottomed flask equipped with reflux condenser was charged with indazole (1.0 Eq.), B<sub>2</sub>Pin<sub>2</sub> (0.505 Eq.), dtbpy (0.006 Eq.) and [Ir(OMe)COD]<sub>2</sub> (0.003 Eq.) in TBME (0.2 M) and the resultant solution was heated at reflux (55 °C) under an atmosphere of nitrogen. The reaction was monitored by GC-MS analysis (typical conversion of 80%). The reaction was cooled to RT and tripotassium phosphate (2.1 Eq.), XPHOS-Pd-G2 (0.02 Eq.), aryl halide (1.0 eq)\* and water (1:10 ratio with TBME) were added. The reaction mixture was heated at reflux (55 °C). Alternatively, the reaction mixture could be transferred to a microwave vial and heated in a microwave reactor at 100 °C for 20 min. The reaction was monitored by a combination of TLC, GC-MS and LC-MS analysis. After cooling to RT, reactions were diluted with water and extracted with organic solvent

(typically DCM or EtOAc), washed with sat'd brine solution, dried and concentrated *in vacuo*. Purification by flash column chromatography afforded the product.

\*N.B. As the aryl halide is used as the limiting reagent and the boryl-indazole in excess, a relative ratio of indazole:aryl halide of 1.6:1, ensures that the active concentration of boryl-indazole of approx. 1.3 Eq., relative to the aryl halide, based on an 80% conversion in the borylation step.)

### 1-Methyl-3-(4,4,5,5-tetramethyl-1,3,2-dioxaborolan-2-yl)indazole, **7**

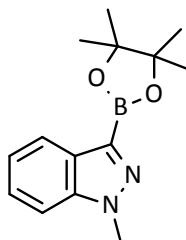

Using General Procedure 1, 1-methyl-1*H*-indazole (4.96 g, 37.5 mmol, 1.0 Eq.), B<sub>2</sub>Pin<sub>2</sub> (4.80 g 18.9 mmol, 0.504 Eq.), dtbpy (60 mg, 0.23 mmol, 0.006 Eq.) and [Ir(OMe)COD]<sub>2</sub> (75 mg 0.113 mmol, 0.003 Eq.) in TBME (150 mL) were heated at reflux (55 °C) under N<sub>2</sub> for 90 min. The reaction was diluted with water (80 mL) and extracted with DCM (3 x 100 mL) and the combined organics were collected and passed through a phase separator cartridge. The organics were concentrated *in vacuo*. Flash column chromatography, elution with 0-50% EtOAc:Hexane, afforded the product. Further purification via trituration from hexane at 5 °C provided the desired product, 1-methyl-3-(4,4,5,5-tetramethyl-1,3,2-dioxaborolan-2-yl)indazole **7** (4.84 g, 18.8 mmol, 50%) as a colourless crystalline solid. NMR analysis showed a trace of pinacol present that did not affect future reactions.

<sup>1</sup>H NMR (400 MHz, DMSO-*d*<sub>6</sub>) δ ppm 1.34 (12 H, s) 4.11 (3 H, s) 7.21 (1 H, t, *J*=7.2 Hz) 7.40 (1 H, t, *J*=7.3 Hz) 7.68 (1 H, d, *J*=8.4 Hz) 7.90 (1 H, d, *J*=8.1 Hz). <sup>13</sup>C NMR (100 MHz, DMSO-*d*<sub>6</sub>) δ ppm 25.2, 36.2, 83.9, 110.4, 121.6, 122.0, 126.2, 129.8, 140.2. MP: 105-107 °C. GCMS (EI): *m/z* = 258, *R*<sub>t</sub> = 2.81 / 5.00 min.

Note: *ipso*-carbon (3 position on indazole) signal not visible in <sup>13</sup>C spectrum.

## 1-Methyl-3-phenyl-indazole, **9**

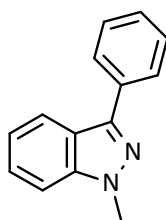

### *Synthesis from Chlorobenzene*

Using General Procedure 2, XPHOS-Pd-G2 (7 mg, 8  $\mu$ mol, 0.02 Eq., tripotassium phosphate (176 mg, 0.828 mmol, 2.10 Eq.), 1-methyl-3-(4,4,5,5-tetramethyl-1,3,2-dioxaborolan-2-yl)indazole **7** (132 mg, 0.513 mmol, 1.3 Eq.), chlorobenzene (44 mg, 0.39 mmol, 1.00 Eq.) in TBME (5 mL) and water (0.5 mL) was heated at reflux (55  $^{\circ}$ C) under  $N_2$  for 18 h. Standard work up, followed by flash column chromatography, elution with 0-15% DCM:Hexane, provided the desired product 1-methyl-3-phenyl-indazole **9** (58 mg, 0.28 mmol, 71%) as a colourless crystalline solid.

Using General Procedure 3, XPHOS-Pd-G2 (7 mg, 8  $\mu$ mol, 0.02 Eq.), tripotassium phosphate (177 mg, 0.83 mmol, 2.10 Eq.), 1-methyl-3-(4,4,5,5-tetramethyl-1,3,2-dioxaborolan-2-yl)indazole **7** (131 mg, 0.511 mmol, 1.3 Eq.), chlorobenzene (44 mg, 0.39 mmol, 1.00 Eq.) in TBME (5 mL) and water (0.5 mL) was heated in a microwave reactor at 100  $^{\circ}$ C for 1 h. Standard work up with DCM, followed by flash column chromatography, elution with 0-15% DCM:Hexane, provided the desired product 1-methyl-3-phenyl-indazole **9** (54 mg, 0.26 mmol, 66%) as a colourless crystalline solid.

Using General Procedure 4, 1-methyl-1*H*-indazole (300 mg, 2.27 mmol),  $B_2Pin_2$  (288 mg 1.13 mmol), dtbpy (1.8 mg, 6.8  $\mu$ mol) and  $[Ir(OMe)COD]_2$  (2.3 mg 3.4  $\mu$ mol) in TBME (5 mL) were heated at reflux (55  $^{\circ}$ C) under  $N_2$  for 90 min. The reaction was cooled to RT and tripotassium phosphate (534 mg, 2.52 mmol), XPHOS-Pd-G2(15 mg, 18  $\mu$ mol), chlorobenzene (135 mg, 1.20 mmol, 1.0 eq) and water (0.5 mL) were added.\* The reaction mixture was heated at reflux (55  $^{\circ}$ C) for 16 h. Standard work up with DCM, followed by flash column chromatography, elution with 0-15% DCM:Hexane, provided the desired product 1-methyl-3-phenyl-indazole **9** (176 mg, 0.85 mmol, 70%) as a colourless crystalline solid.

\*Based on GC-MS for borylation step: 74% conversion to 1-methyl-3-(4,4,5,5-tetramethyl-1,3,2-dioxaborolan-2-yl)indazole **7** provides approx. 1.68 mmol, 1.4 Eq. of active boronate species.

### *Synthesis from Bromobenzene*

Using General Procedure 2, XPHOS-Pd-G2 (9 mg, 10  $\mu$ mol, 0.02 Eq.), tripotassium phosphate (227 mg, 1.07 mmol, 2.10 Eq.), 1-methyl-3-(4,4,5,5-tetramethyl-1,3,2-dioxaborolan-2-yl)indazole **7** (144 mg, 0.56 mmol, 1.1 Eq.), bromobenzene (80 mg, 0.51 mmol, 1.00 Eq.) in TBME (5 mL) and water (0.5 mL) was heated at reflux (55  $^{\circ}$ C) under N<sub>2</sub> for 16 h. Standard work up with DCM, followed by flash column chromatography, elution with 0-30% DCM:Hexane, provided the desired product 1-methyl-3-phenyl-indazole **9** (91 mg, 0.44 mmol, 86%) as a white solid.

Using General Procedure 3, XPHOS-Pd-G2 (9 mg, 10  $\mu$ mol, 0.02 Eq.), tripotassium phosphate (227 mg, 1.07 mmol, 2.10 Eq.), 1-methyl-3-(4,4,5,5-tetramethyl-1,3,2-dioxaborolan-2-yl)indazole **7** (170 mg, 0.66 mmol, 1.3 Eq.), bromobenzene (81 mg, 0.51 mmol, 1.00 Eq.) in TBME (5 mL) and water (0.5 mL) was heated in a microwave reactor at 100  $^{\circ}$ C for 1 h. Standard work up, followed by flash column chromatography, elution with 2.5% EtOAc:Hexane, provided the desired product 1-methyl-3-phenyl-indazole **9** (57 mg, 0.35 mmol, 68%) as a white solid.

### *Synthesis from Iodobenzene*

Using General Procedure 2, XPHOS-Pd-G2 (6 mg, 7  $\mu$ mol, 0.02 Eq.), tripotassium phosphate (160 mg, 0.753 mmol, 2.10 Eq.), 1-methyl-3-(4,4,5,5-tetramethyl-1,3,2-dioxaborolan-2-yl)indazole **7** (102 mg, 0.395 mmol, 1.1 Eq.), iodobenzene (73 mg, 0.36 mmol, 1.00 Eq.) in TBME (5 mL) and water (0.5 mL) was heated at reflux (55  $^{\circ}$ C) under N<sub>2</sub> for 16 h. Standard work up with DCM, followed by flash column chromatography, elution with 0-50% DCM:Hexane, provided the desired product 1-methyl-3-phenyl-indazole **9** (54 mg, 0.26 mmol, 72%) as a white solid.

Using General Procedure 3, XPHOS-Pd-G2 (6 mg, 7  $\mu$ mol, 0.02 Eq.), tripotassium phosphate (160 mg, 0.753 mmol, 2.10 Eq.), 1-methyl-3-(4,4,5,5-tetramethyl-1,3,2-dioxaborolan-2-yl)indazole **7** (102 mg, 0.395 mmol, 1.1 Eq.), iodobenzene (73 mg, 0.36 mmol, 1.00 Eq.) in TBME (5 mL) and water (0.5 mL) was heated in a microwave reactor at 100  $^{\circ}$ C for 45 min. Standard work up with DCM, followed by flash column chromatography, elution with 0-50% DCM:Hexane, provided the desired product 1-methyl-3-phenyl-indazole **9** (55 mg, 0.27 mmol, 74%) as a white solid.

$^1\text{H}$  NMR (400 MHz,  $\text{DMSO-}d_6$ )  $\delta$  ppm 4.12 (3 H, s) 7.24 (1 H, t,  $J=7.6$  Hz) 7.38 - 7.43 (1 H, m) 7.46 (1 H, t,  $J=7.6$  Hz) 7.52 (2 H, t,  $J=7.6$  Hz) 7.70 (1 H, d,  $J=8.3$  Hz) 7.98 (2 H, d,  $J=7.3$  Hz) 8.07 (1 H, d,  $J=8.3$  Hz).  $^{13}\text{C}$  NMR (100 MHz,  $\text{DMSO-}d_6$ )  $\delta$  ppm 36.0, 110.6, 121.1, 121.3, 121.7, 126.7, 127.2, 128.2, 129.4, 133.8, 141.7, 142.4.  $m/z$  [ $\text{Cl}^+$ , isobutane] 209 [ $\text{M}+\text{H}^+$ ] (100%), HRMS found [ $\text{M}+\text{H}^+$ ] 209.1073,  $\text{C}_{14}\text{H}_{13}\text{N}_2$  requires 209.1079. MP: 74-76 °C.

### 1-Methyl-3-(1-naphthyl)indazole, **10**

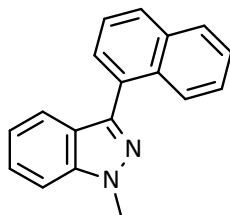

Using General Procedure 2, XPHOS-Pd-G2 (6 mg, 7  $\mu\text{mol}$ , 0.02 Eq.), tripotassium phosphate (163 mg, 0.770 mmol, 2.10 Eq.), 1-methyl-3-(4,4,5,5-tetramethyl-1,3,2-dioxaborolan-2-yl)indazole **7** (104 mg, 0.403 mmol, 1.1 Eq.), 1-chloronaphthalene (60 mg, 0.37 mmol, 1.00 Eq.) in TBME (5 mL) and water (0.5 mL) was heated at reflux (55 °C) under  $\text{N}_2$  for 10 h. Standard work up with DCM, followed by flash column chromatography, elution with 0-100% DCM:Hexane, provided the desired product 1-Methyl-3-(1-naphthyl)indazole **10** (60 mg, 0.63 mmol, 63%) as a white solid.

Using General Procedure 3, XPHOS-Pd-G2 (7 mg, 9  $\mu\text{mol}$ , 0.02 Eq.), tripotassium phosphate (193 mg, 0.910 mmol, 2.10 Eq.), 1-methyl-3-(4,4,5,5-tetramethyl-1,3,2-dioxaborolan-2-yl)indazole **7** (153 mg, 0.592 mmol, 1.3 Eq.), 1-chloronaphthalene (73 mg, 0.36 mmol, 1.00 Eq.) in TBME (5 mL) and water (0.5 mL) was heated in a microwave reactor at 100 °C for 20 min. Standard work up with DCM, followed by flash column chromatography, elution with 0-100% DCM:Hexane, provided the desired product, 1-methyl-3-(1-naphthyl)indazole **10** (114 mg, 0.97 mmol, 97%) as a white solid.

$^1\text{H}$  NMR (400 MHz,  $\text{DMSO-}d_6$ )  $\delta$  ppm 4.20 (3 H, s) 7.20 (1 H, t,  $J=7.5$  Hz) 7.46 - 7.69 (5 H, m) 7.76 (2 H, d,  $J=7.7$  Hz) 8.04 (2 H, d,  $J=8.1$  Hz) 8.29 (1 H, d,  $J=8.3$  Hz).  $^{13}\text{C}$  NMR (100 MHz,  $\text{DMSO-}d_6$ )  $\delta$  ppm 36.1, 110.6, 121.0, 121.5, 123.1, 126.1, 126.3, 126.6, 126.8, 126.9, 128.3, 128.8, 128.9, 130.5, 131.6, 134.2, 141.1, 142.5.  $m/z$  [ $\text{Cl}^+$ , isobutane] 259 [ $\text{M}+\text{H}^+$ ] (100%), HRMS found [ $\text{M}+\text{H}^+$ ] 259.1228,  $\text{C}_{18}\text{H}_{15}\text{N}_2$  requires 259.1235. MP: 135-138 °C.

### 3-(2,6-Diethylphenyl)-1-methyl-indazole, **11**

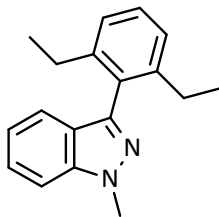

Using General Procedure 3, XPHOS-Pd-G2 (9 mg, 10  $\mu\text{mol}$ , 0.02 Eq.), tripotassium phosphate (230 mg, 1.08 mmol, 2.10 Eq.), 1-methyl-3-(4,4,5,5-tetramethyl-1,3,2-dioxaborolan-2-yl)indazole **7** (173 mg, 0.671 mmol, 1.3 Eq.), 2-bromo-1,3-diethyl-benzene (110 mg, 0.516 mmol, 1.00 Eq.) in TBME (5 mL) and water (0.5 mL) was heated in a microwave reactor at 100  $^{\circ}\text{C}$  for 20 min. Standard work up with DCM, followed by flash column chromatography, elution with 0-3% EtOAc:Hexane, provided the desired product, 3-(2,6-diethylphenyl)-1-methyl-indazole **11** (123 mg, 0.465 mmol, 90%) as a white solid.

$^1\text{H}$  NMR (400 MHz,  $\text{DMSO}-d_6$ )  $\delta$  ppm 0.90 (6 H, t,  $J=7.5$  Hz) 2.15 - 2.24 (2 H, m) 2.24 - 2.34 (2 H, m) 4.10 (3 H, s) 7.10 (1 H, t,  $J=7.1$  Hz) 7.20 (2 H, d,  $J=7.7$  Hz) 7.26 (1 H, d,  $J=8.2$  Hz) 7.36 (1 H, t,  $J=7.7$  Hz) 7.40 - 7.44 (1 H, m) 7.68 (1 H, d,  $J=8.6$  Hz).  $^{13}\text{C}$  NMR (100 MHz,  $\text{DMSO}-d_6$ )  $\delta$  ppm 16.2, 26.8, 35.8, 110.3, 120.5, 120.9, 123.7, 126.2, 126.5, 129.2, 131.2, 140.6, 142.4, 144.4.  $m/z$  [ $\text{Cl}^+$ , isobutane] 265 [ $\text{M}+\text{H}$ ] $^+$  (100%), HRMS found [ $\text{M}+\text{H}$ ] $^+$  265.1697,  $\text{C}_{18}\text{H}_{21}\text{N}_2$  requires 265.1705. MP: 91-93  $^{\circ}\text{C}$ .

### 3-(4-Methoxyphenyl)-1-methyl-indazole, **12**

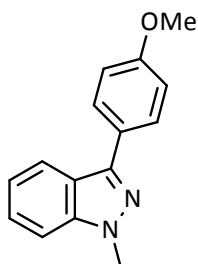

Using General Procedure 3, XPHOS-Pd-G2 (6 mg, 8  $\mu\text{mol}$ , 0.02 Eq.), tripotassium phosphate (169 mg, 0.795 mmol, 2.10 Eq.), 1-methyl-3-(4,4,5,5-tetramethyl-1,3,2-dioxaborolan-2-yl)indazole **7** (127 mg, 0.492 mmol, 1.3 Eq.), 1-chloro-4-methoxy-benzene (54 mg, 0.379 mmol, 1.00 Eq.) in TBME (5 mL) and water (0.5 mL) was heated in a microwave reactor at 100  $^{\circ}\text{C}$  for 20 min. Standard work up with DCM, followed by flash column chromatography, elution with 0-5% EtOAc:Hexane,



provided the desired product, 3-(4-methoxyphenyl)-1-methyl-indazole **12** (69 mg, 0.290 mmol, 76%) as a colourless oil.

$^1\text{H}$  NMR (400 MHz,  $\text{DMSO-}d_6$ )  $\delta$  ppm 3.83 (3 H, s) 4.09 (3 H, s) 7.03 - 7.14 (2 H, m) 7.21 (1 H, t,  $J=7.5$  Hz) 7.45 (1 H, t,  $J=7.5$  Hz) 7.67 (1 H, d,  $J=8.3$  Hz) 7.84 - 7.96 (2 H, m) 8.03 (1 H, d,  $J=7.8$  Hz).  $^{13}\text{C}$  NMR (100 MHz,  $\text{DMSO-}d_6$ )  $\delta$  ppm 35.9, 55.7, 110.5, 114.8, 121.0, 121.3, 121.4, 126.4, 126.6, 128.4, 141.6, 142.4, 159.4.  $m/z$  [ $\text{Cl}^+$ , isobutane] 239 [ $\text{M}+\text{H}^+$ ] (100%), HRMS found [ $\text{M}+\text{H}^+$ ] 239.1176,  $\text{C}_{15}\text{H}_{15}\text{N}_2\text{O}$  requires 239.1184.

### 3-(3,5-Dimethoxyphenyl)-1-methyl-indazole, **13**

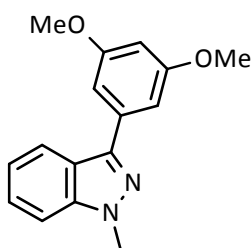

Using General Procedure 3, XPHOS-Pd-G2 (6 mg, 7  $\mu\text{mol}$ , 0.02 Eq.), tripotassium phosphate (147 mg, 0.694 mmol, 2.10 Eq.), 1-methyl-3-(4,4,5,5-tetramethyl-1,3,2-dioxaborolan-2-yl)indazole **7** (111 mg, 0.429 mmol, 1.3 Eq.), 1-chloro-3,5-dimethoxy-benzene (57 mg, 0.330 mmol, 1.00 Eq.) in TBME (5 mL) and water (0.5 mL) was heated in a microwave reactor at 100  $^{\circ}\text{C}$  for 20 min. Standard work up with DCM, followed by flash column chromatography, elution with 0-7.5% EtOAc:Hexane, provided the desired product, 3-(3,5-Dimethoxyphenyl)-1-methyl-indazole **13** (81 mg, 0.302 mmol, 91%) as a colourless oil.

$^1\text{H}$  NMR (400 MHz,  $\text{DMSO-}d_6$ )  $\delta$  ppm 3.84 (6 H, s) 4.11 (3 H, s) 6.55 (1 H, t,  $J=2.2$  Hz) 7.06 (2 H, d,  $J=2.4$  Hz) 7.24 (1 H, t,  $J=7.6$  Hz) 7.42 - 7.50 (1 H, m) 7.70 (1 H, d,  $J=8.3$  Hz) 8.04 (1 H, d,  $J=7.8$  Hz).  $^{13}\text{C}$  NMR (100 MHz,  $\text{DMSO-}d_6$ )  $\delta$  ppm 36.0, 55.8, 100.4, 105.1, 110.6, 121.1, 121.2, 121.8, 126.7, 135.7, 141.7, 142.3, 161.3.  $m/z$  [ $\text{Cl}^+$ , isobutane] 269 [ $\text{M}+\text{H}^+$ ] (100%), HRMS found [ $\text{M}+\text{H}^+$ ] 269.1282,  $\text{C}_{16}\text{H}_{17}\text{N}_2\text{O}_2$  requires 269.1290. MP: 47-50  $^{\circ}\text{C}$ .

#### 4-(1-Methylindazol-3-yl)phenol, **14**

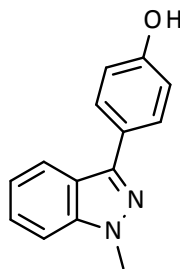

Using General Procedure 3, XPHOS-Pd-G2 (7 mg, 8  $\mu$ mol, 0.02 Eq.), tripotassium phosphate (173 mg, 0.817 mmol, 2.10 Eq.), 1-methyl-3-(4,4,5,5-tetramethyl-1,3,2-dioxaborolan-2-yl)indazole **7** (131 mg, 0.506 mmol, 1.3 Eq.), 4-chlorophenol (50 mg, 0.326 mmol, 1.00 Eq.) in TBME (5 mL) and water (0.5 mL) was heated in a microwave reactor at 100 °C for 20 min. Standard work up with EtOAc, followed by flash column chromatography, elution with 0-40% EtOAc:Hexane, provided the desired product, 4-(1-Methylindazol-3-yl)phenol **14** (73 mg, 0.326 mmol, 84%) as a white solid.

Using General Procedure 4, 1-methyl-1*H*-indazole (300 mg, 2.27 mmol), B<sub>2</sub>Pin<sub>2</sub> (288 mg 1.13 mmol), dtbpy (1.8 mg, 6.8  $\mu$ mol, 0.003 Eq.) and [Ir(OMe)COD]<sub>2</sub> (2.3 mg 3.4  $\mu$ mol) in TBME (5 mL) were heated at reflux (55 °C) under N<sub>2</sub> for 90 min. The reaction was cooled to RT and the contents were transferred to a microwave vial. Tripotassium phosphate (534 mg, 2.52 mmol), XPHOS-Pd-G2 (15 mg, 18  $\mu$ mol), 4-chlorophenol (154 mg, 1.20 mmol) and water (0.5 mL) were added.\* The reaction mixture was heated in a microwave reactor at 100 °C for 20 min. Standard work up with DCM, followed by flash column chromatography, elution with 0-40% EtOAc:Hexane, provided the desired product, 4-(1-methylindazol-3-yl)phenol **14** (71 mg, 0.318 mmol, 82%) as a white solid.

\*Based on GC-MS for borylation step: 74% conversion to 1-methyl-3-(4,4,5,5-tetramethyl-1,3,2-dioxaborolan-2-yl)indazole **7** provides approx. 1.68 mmol, 1.4 Eq. of active boronate species.

<sup>1</sup>H NMR (400 MHz, DMSO-*d*<sub>6</sub>)  $\delta$  ppm 4.06 (3 H, s) 6.93 (2 H, d, *J*=8.6 Hz) 7.18 (1 H, t, *J*=7.5 Hz) 7.42 (1 H, t, *J*=7.6 Hz) 7.62 (1 H, d, *J*=8.6 Hz) 7.80 (2 H, d, *J*=8.6 Hz) 8.00 (1 H, d, *J*=8.2 Hz) 9.65 (1 H, s).  
<sup>13</sup>C NMR (100 MHz, DMSO-*d*<sub>6</sub>)  $\delta$  ppm 35.8, 110.3, 116.2, 120.9, 121.2, 121.4, 124.8, 126.5, 128.5, 141.6, 142.8, 157.7. *m/z* [Cl<sup>+</sup>, isobutane] 225 [M+H]<sup>+</sup> (100%), HRMS found [M+H]<sup>+</sup> 225.1019, C<sub>14</sub>H<sub>12</sub>N<sub>2</sub>O requires 225.1028. MP: 242-145 °C.

### 1-Methyl-3-(2-pyridyl)indazole, 15

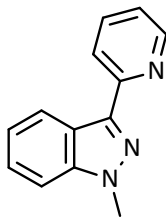

Using General Procedure 3, XPHOS-Pd-G2 (7 mg, 9  $\mu$ mol, 0.02 Eq.), tripotassium phosphate (196 mg, 0.925 mmol, 2.10 Eq.), 1-methyl-3-(4,4,5,5-tetramethyl-1,3,2-dioxaborolan-2-yl)indazole **7** (148 mg, 0.573 mmol, 1.3 Eq.), 2-chloropyridine (50 mg, 0.440 mmol, 1.00 Eq.) in TBME (5 mL) and water (0.5 mL) was heated in a microwave reactor at 100 °C for 20 min. Standard work up with EtOAc, followed by flash column chromatography, elution with 0-2% MeOH:DCM, provided the desired product, 1-methyl-3-(2-pyridyl)indazole **15** (80 mg, 0.382 mmol, 87%) as a colourless oil.

$^1\text{H}$  NMR (400 MHz, DMSO- $d_6$ )  $\delta$  ppm 4.14 (3 H, s) 7.26 (1 H, t,  $J=7.5$  Hz) 7.35 (1 H, t,  $J=6.2$  Hz) 7.46 (1 H, t,  $J=7.6$  Hz) 7.69 (1 H, d,  $J=8.6$  Hz) 7.88 (1 H, td,  $J=7.8, 1.7$  Hz) 8.13 (1 H, d,  $J=7.9$  Hz) 8.59 (1 H, d,  $J=8.2$  Hz) 8.72 (1 H, d,  $J=4.8$  Hz).  $^{13}\text{C}$  NMR (100 MHz, DMSO- $d_6$ )  $\delta$  ppm 36.2, 110.4, 120.5, 122.0, 122.0, 122.9, 123.7, 126.9, 137.3, 141.8, 141.9, 149.8, 153.6.  $m/z$  [ $\text{Cl}^+$ , isobutane] 210 [ $\text{M}+\text{H}^+$ ] (100%), HRMS found [ $\text{M}+\text{H}^+$ ] 210.1022,  $\text{C}_{13}\text{H}_{12}\text{N}_3$  requires 210.1031.

### 1-Methyl-3-pyrimidin-2-yl-indazole, 16

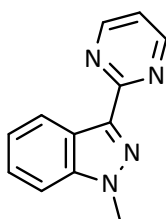

Using General Procedure 3, XPHOS-Pd-G2 (9 mg, 10  $\mu$ mol, 0.02 Eq.), tripotassium phosphate (224 mg, 1.06 mmol, 2.10 Eq.), 1-methyl-3-(4,4,5,5-tetramethyl-1,3,2-dioxaborolan-2-yl)indazole **7** (156 mg, 0.604 mmol, 1.3 Eq.), 2-bromopyrimidine (80 mg, 0.503 mmol, 1.00 Eq.) in TBME (5 mL) and water (0.5 mL) was heated in a microwave reactor at 100 °C for 20 min. Standard work up with EtOAc, followed by flash column chromatography, elution with 0-100% EtOAc:Hexane, provided the desired product, 1-methyl-3-pyrimidin-2-yl-indazole **16** (103 mg, 0.490 mmol, 97%) as a beige solid.

$^1\text{H}$  NMR (400 MHz,  $\text{CDCl}_3$ )  $\delta$  ppm 4.23 (3 H, s) 7.22 (1 H, t,  $J=4.8$  Hz) 7.32 (1 H, ddd,  $J=8.1, 4.7, 3.2$  Hz) 7.45 - 7.48 (2 H, m) 8.68 (1 H, d,  $J=8.2$  Hz) 8.89 (2 H, d,  $J=4.9$  Hz).  $^{13}\text{C}$  NMR (100 MHz,  $\text{CDCl}_3$ )  $\delta$  ppm 36.2, 109.2, 119.0, 122.2, 123.2, 123.6, 126.6, 141.4, 141.6, 157.4, 161.7.  $m/z$  [ $\text{Cl}^+$ , isobutane] 211 [ $\text{M}+\text{H}^+$ ] (100%), HRMS found [ $\text{M}+\text{H}^+$ ] 211.0976,  $\text{C}_{12}\text{H}_{11}\text{N}_4$  requires 211.0984. MP: 76-78 °C.

### Methyl 3-(4-methoxyphenyl)-1-methyl-indazole-5-carboxylate, **17**

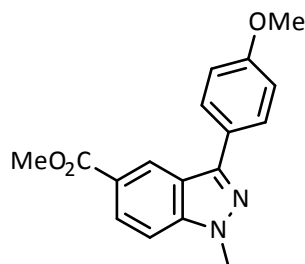

Using General Procedure 4, methyl 1-methyl-1H-indazole-5-carboxylate (225 mg, 1.18 mmol),  $\text{B}_2\text{Pin}_2$  (300 mg 1.18 mmol), dtbpy (1.9 mg, 7.1  $\mu\text{mol}$ ) and  $[\text{Ir}(\text{OMe})\text{COD}]_2$  (2.3 mg, 3.5  $\mu\text{mol}$ ) in TBME (5 mL) were heated at reflux (55 °C) under  $\text{N}_2$  for 2.5 h. The reaction was cooled to RT and the contents were transferred to a microwave vial. Tripotassium phosphate (309 mg, 1.46 mmol), XPHOS-Pd-G2 (12 mg, 15  $\mu\text{mol}$ ), 1-chloro-4-methoxy-benzene (104 mg, 0.728 mmol) and water (0.5 mL) were added.\* The reaction mixture was heated in a microwave reactor at 100 °C for 20 min. Standard work up with DCM, followed by flash column chromatography, elution with 0-10% EtOAc:Hexane, provided the desired product, methyl 3-(4-hydroxyphenyl)-1-methyl-indazole-5-carboxylate **17** (140 mg, 0.473 mmol, 65%) as a white solid.

\*Based on GC-MS for borylation step: 80% conversion to methyl 1-methyl-3-(4,4,5,5-tetramethyl-1,3,2-dioxaborolan-2-yl)indazole-5-carboxylate provides approx. 0.946 mmol, 1.3 Eq. of active boronate species.

$^1\text{H}$  NMR (400 MHz,  $\text{CDCl}_3$ )  $\delta$  ppm 3.89 (3 H, s) 3.95 (3 H, s) 4.13 (3 H, s) 7.02 - 7.11 (2 H, m) 7.40 (1 H, d,  $J=8.8$  Hz) 7.87 - 7.93 (2 H, m) 8.09 (1 H, dd,  $J=8.8, 1.5$  Hz) 8.74 (1 H, s).  $^{13}\text{C}$  NMR (100 MHz,  $\text{CDCl}_3$ )  $\delta$  ppm 35.7, 52.1, 55.4, 108.8, 114.4, 121.3, 122.9, 125.0, 125.5, 127.2, 128.8, 143.1, 145.5, 159.9, 167.4.  $m/z$  [ $\text{Cl}^+$ , isobutane] 297 [ $\text{M}+\text{H}^+$ ] (100%), HRMS found [ $\text{M}+\text{H}^+$ ] 297.1229,  $\text{C}_{17}\text{H}_{17}\text{N}_2\text{O}_3$  requires 297.1239. MP: 122-124 °C.

### 1-(Methoxymethyl)-3-(4-methoxyphenyl)indazole, **18**

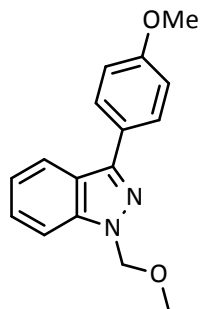

Using General Procedure 4, 1-(methoxymethyl)indazole (471 mg, 2.89 mmol),  $B_2Pin_2$  (738 mg, 2.89 mmol), dtbpy (4.6 mg, 17  $\mu$ mol) and  $[Ir(OMe)COD]_2$  (5.8 mg, 8.6  $\mu$ mol) in TBME (10 mL) were heated at reflux (55  $^{\circ}C$ ) under  $N_2$  for 70 min. The reaction was cooled to RT and the contents were transferred to a microwave vial. Tripotassium phosphate (790 mg, 3.72 mmol, 2.0 Eq.), XPHOS-Pd-G2 (23 mg, 28  $\mu$ mol), 1-chloro-4-methoxy-benzene (274 mg, 1.86 mmol) and water (1 mL) were added.\* The reaction mixture was heated in a microwave reactor at 100  $^{\circ}C$  for 20 min. Standard work up with DCM, followed by flash column chromatography, elution with 0-4% EtOAc:Hexane, provided the desired product, 1-(methoxymethyl)-3-(4-methoxyphenyl)indazole **18** (349 mg, 1.30 mmol, 70%) as a white solid.

\*Based on GC-MS for borylation step: 90% conversion to 1-(methoxymethyl)-3-[4-(4,4,5,5-tetramethyl-1,3-dioxolan-2-yl)phenyl]indazole provides approx. 2.60 mmol, 1.4 Eq. of active boronate species.

$^1H$  NMR (500 MHz,  $CDCl_3$ )  $\delta$  ppm 3.36 (3 H, s) 3.88 (3 H, s), 5.74 (2 H, s) 7.05 (2 H, d,  $J=8.4$  Hz) 7.25 (1 H, t,  $J=7.7$  Hz) 7.44 (1 H, t,  $J=7.6$  Hz) 7.58 (1 H, d,  $J=8.4$  Hz) 7.89 - 7.93 (1 H, m) 7.91 (2 H, d,  $J=8.3$  Hz) 7.99 (1 H, d,  $J=8.1$  Hz).  $^{13}C$  NMR (100 MHz,  $CDCl_3$ )  $\delta$  ppm 55.4, 56.6, 79.4, 109.8, 114.3, 121.5, 121.6, 122.6, 125.9, 126.8, 128.9, 141.3, 145.0, 159.7.  $m/z$  [ $Cl^+$ , isobutane] 269 [ $M+H$ ] $^+$  (100%), HRMS found [ $M+H$ ] $^+$  269.1274,  $C_{16}H_{17}N_2O_2$  requires 269.1285. MP: 52-53  $^{\circ}C$ .

## Methyl 4-[1-(methoxymethyl)indazol-3-yl]benzoate, **19**

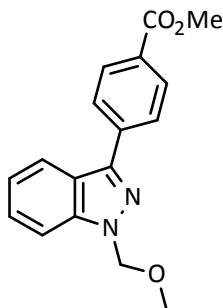

Using General Procedure 4, 1-(methoxymethyl)indazole (471 mg, 2.89 mmol),  $B_2Pin_2$  (738 mg, 2.89 mmol), dtbpy (4.6 mg, 17  $\mu$ mol) and  $[Ir(OMe)COD]_2$  (5.8 mg, 8.6  $\mu$ mol) in TBME (10 mL) were heated at reflux (55  $^{\circ}C$ ) under  $N_2$  for 70 min. The reaction was cooled to RT and the contents were transferred to a microwave vial. Tripotassium phosphate (790 mg, 3.72 mmol), XPHOS-Pd-G2 (23 mg, 28  $\mu$ mol), methyl 4-bromobenzoate (400 mg, 1.86 mmol) and water (1 mL) were added.\* The reaction mixture was heated in a microwave reactor at 100  $^{\circ}C$  for 20 min. Standard work up with DCM, followed by flash column chromatography, elution with 0-100% DCM:Hexane, provided the desired product, methyl 4-[1-(methoxymethyl)indazol-3-yl]benzoate **19** (430 mg, 1.45 mmol, 78%) as a white solid.

\*Based on GC-MS for borylation step: 90% conversion to 1-(methoxymethyl)-3-[4-(4,4,5,5-tetramethyl-1,3-dioxolan-2-yl)phenyl]indazole provides approx. 2.60 mmol, 1.4 Eq. of active boronate species.

$^1H$  NMR (500 MHz,  $CDCl_3$ )  $\delta$  ppm 3.38 (3 H, s) 3.96 (3 H, s) 5.78 (2 H, s) 7.28 - 7.33 (1 H, m) 7.46 - 7.51 (1 H, m) 7.63 (1 H, d,  $J=8.5$  Hz) 8.05 (1 H, d,  $J=8.2$  Hz) 8.07 - 8.10 (2 H, m) 8.17 - 8.20 (2 H, m).  $^{13}C$  NMR (100 MHz,  $CDCl_3$ )  $\delta$  ppm 52.2, 56.7, 79.7, 110.1, 121.2, 122.3, 122.6, 127.1, 127.3, 129.6, 130.1, 137.8, 141.4, 143.9, 166.9.  $m/z$  [ $Cl^+$ , isobutane] 297 [ $M+H$ ] $^+$  (100%), HRMS found [ $M+H$ ] $^+$  297.1223,  $C_{17}H_{17}N_2O_3$  requires 297.1234. MP: 110-112  $^{\circ}C$ .

### 3-(4-Methoxyphenyl)-1-methyl-pyrazolo[3,4-b]pyridine, **20**

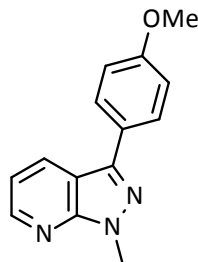

Using General Procedure 4, 1-methylpyrazolo[3,4-*b*]pyridine (245 mg, 1.35 mmol), B<sub>2</sub>Pin<sub>2</sub> (173 mg, 0.681 mmol), dtbpy (2.2 mg, 8.1 μmol, 0.006 Eq.) and [Ir(OMe)COD]<sub>2</sub> (2.7 mg, 4.1 μmol) in TBME (5 mL) were heated at reflux (55 °C) under N<sub>2</sub> for 4 h. The reaction was cooled to RT and the contents were transferred to a microwave vial. Tripotassium phosphate (287 mg, 1.35 mmol), XPHOS-Pd-G2 (9 mg, 11 μmol), 1-chloro-4-methoxy-benzene (96 mg, 0.68 mmol) and water (0.5 mL) were added.\* The reaction mixture was heated in a microwave reactor at 100 °C for 20 min. Standard work up with DCM, followed by flash column chromatography, elution with 0-15% EtOAc:Hexane, provided the desired product, 3-(4-methoxyphenyl)-1-methyl-pyrazolo[3,4-*b*]pyridine **20** (114 mg, 0.476 mmol, 71%) as an off-white solid.

\*Based on GC-MS for borylation step: 70% conversion to 1-methyl-3-(4,4,5,5-tetramethyl-1,3,2-dioxaborolan-2-yl)pyrazolo[3,4-*b*]pyridine provides approx. 1.95 mmol, 1.4 Eq. of active boronate species.

<sup>1</sup>H NMR (400 MHz, CDCl<sub>3</sub>) δ ppm 3.89 (3 H, s) 4.20 (3 H, s) 7.05 (2 H, d, *J*=8.7 Hz) 7.16 (1 H, dd, *J*=8.1, 4.5 Hz) 7.89 (2 H, d, *J*=8.7 Hz) 8.31 (1 H, d, *J*=8.1 Hz) 8.53 - 8.61 (1 H, m). <sup>13</sup>C NMR (100 MHz, CDCl<sub>3</sub>) δ ppm 33.9, 55.4, 113.4, 114.4, 116.6, 125.9, 128.2, 130.5, 142.5, 148.6, 151.4, 159.8. *m/z* [Cl<sup>+</sup>, isobutane] 240 [M+H]<sup>+</sup> (100%), HRMS found [M+H]<sup>+</sup> 240.1130, C<sub>14</sub>H<sub>14</sub>N<sub>3</sub>O requires 240.1137. MP: 67-69 °C.

## Methyl 6-(4-methoxycarbonylphenyl)-1-methyl-indazole-4-carboxylate, **21**

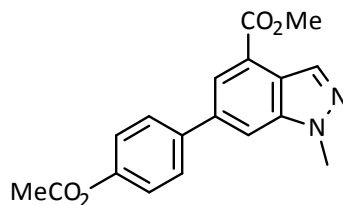

Using General Procedure 4, methyl 1-methyl-1*H*-indazole-4-carboxylate (232 mg, 1.22 mmol), B<sub>2</sub>Pin<sub>2</sub> (310 mg, 1.22 mmol), dtbpy (2.0 mg, 7.3 μmol) and [Ir(OMe)COD]<sub>2</sub> (2.5 mg, 3.7 μmol) in TBME (5 mL) were heated at reflux (55 °C) under N<sub>2</sub> for 6 h. The reaction was cooled to RT and the contents were transferred to a microwave vial. Tripotassium phosphate (259 mg, 1.22 mmol), XPHOS-Pd-G2 (8 mg, 9 μmol), methyl 4-bromobenzoate (131 mg, 0.610 mmol) and water (0.5 mL) were added.\* The reaction mixture was heated in a microwave reactor at 100 °C for 20 min. Standard work up with DCM, followed by flash column chromatography, elution with 0-10% EtOAc:Hexane, provided the undesired product, methyl 6-(4-methoxycarbonylphenyl)-1-methyl-indazole-4-carboxylate **21** (175 mg, 0.540 mmol, 89%) as a white solid.

\*Based on GC-MS for borylation step: 85% conversion to methyl 1-methyl-6-(4,4,5,5-tetramethyl-1,3,2-dioxaborolan-2-yl)indazole-4-carboxylate provides approx. 0.854 mmol, 1.4 Eq. of active boronate species.

<sup>1</sup>H NMR (400 MHz, CDCl<sub>3</sub>) δ ppm 3.97 (3 H, s) 4.06 (3 H, s) 4.18 (3 H, s) 7.75 - 7.80 (2 H, m) 7.81 (1 H, t, *J*=1.1 Hz) 8.14 - 8.19 (2 H, m) 8.21 (1 H, d, *J*=1.3 Hz) 8.49 (1 H, d, *J*=0.9 Hz). <sup>13</sup>C NMR (100 MHz, CDCl<sub>3</sub>) δ ppm 35.9, 52.3, 52.3, 112.0, 122.1, 123.5, 124.1, 127.6, 129.5, 130.3, 133.7, 138.1, 141.0, 144.8, 166.6, 166.8. *m/z* [Cl<sup>+</sup>, isobutane] 325 [M+H]<sup>+</sup> (100%), HRMS found [M+H]<sup>+</sup> 325.1181, C<sub>18</sub>H<sub>17</sub>N<sub>2</sub>O<sub>4</sub> requires 325.1189. MP: 177-179 °C.
